# Supplementary material
Source: PubMed Central journal article supplement (PMC7031468)
Supplement: 11357_2019_120_MOESM3_ESM.pdf [file 11357_2019_120_MOESM3_ESM.pdf]

**Online Resource 3: CircRNA profile in ageing human peripheral blood.** CircRNA profiles were generated from 2 pooled samples of human peripheral blood. Pool 1 consisted of RNA samples from 20 young individuals (median age 33 years) and 20 aged individuals (median age 87 years) using CircleSeq. The table gives the host transcript identity, the host transcript NM\_ number, the chromosomal position and the ranked abundance of each from those expressed exclusively in the young (rows 4 to 434), those expressed in both old and young ranked by fold change (rows 436 to 619) and those expressed exclusively in old samples (rows 621 to 2122). Assays to unique circRNA backspliced junctions were designed to transcripts marked in bold type. These represented the top 5 most abundant circRNA expressed exclusively in young, the top 5 circRNA expressed exclusively in old, and 5 which demonstrated the most dysregulation between young and old pools. In some cases, we were unable to design assays to circRNAs in these categories, because of sequence and assay design constraints. In these cases, we designed assays to the next most abundant/dysregulated circRNA.

| Transcript Id             | Gene Id         | chromosome             | start            | stop             | raw_count<br>(young) | BPM<br>(young)  | raw_count<br>Old | BPA<br>(old) | Fold<br>change |
|---------------------------|-----------------|------------------------|------------------|------------------|----------------------|-----------------|------------------|--------------|----------------|
| <b>NM_000887.12.10</b>    | <b>ITGAX</b>    | <b>chr16</b>           | <b>31373156</b>  | <b>31374074</b>  | <b>13</b>            | <b>357.6646</b> | N/A              | N/A          | N/A            |
| <b>NM_014798.4.4</b>      | <b>PLEKHM1</b>  | <b>chr17_ctg5_hap1</b> | <b>167528</b>    | <b>168155</b>    | <b>9</b>             | <b>247.614</b>  | N/A              | N/A          | N/A            |
| <i>NM_007166.12.9</i>     | <i>PICALM</i>   | <i>chr11</i>           | <i>85707868</i>  | <i>85714494</i>  | <i>9</i>             | <i>247.614</i>  | <i>N/A</i>       | <i>N/A</i>   | <i>N/A</i>     |
| <b>NM_022047.5.4</b>      | <b>DEF6</b>     | <b>chr6</b>            | <b>35280078</b>  | <b>35280549</b>  | <b>7</b>             | <b>192.5886</b> | N/A              | N/A          | N/A            |
| <b>NM_001130021.17.16</b> | <b>ATP6V0A1</b> | <b>chr17</b>           | <b>40652724</b>  | <b>40653322</b>  | <b>7</b>             | <b>192.5886</b> | N/A              | N/A          | N/A            |
| <b>NM_018482.13.10</b>    | <b>ASAP1</b>    | <b>chr8</b>            | <b>131164981</b> | <b>131181313</b> | <b>7</b>             | <b>192.5886</b> | N/A              | N/A          | N/A            |
| NM_000333.4.3             | ATXN7           | chr3                   | 63898263         | 63898901         | 6                    | 165.076         | N/A              | N/A          | N/A            |
| NM_032959.8.7             | POLR2J2         | chr7                   | 102279160        | 102279646        | 6                    | 165.076         | N/A              | N/A          | N/A            |
| NM_004824.2.2             | CDYL            | chr6                   | 4891946          | 4892613          | 6                    | 165.076         | N/A              | N/A          | N/A            |
| NR_002939.9.6             | -               | chr16                  | 29367107         | 29376380         | 5                    | 137.5633        | N/A              | N/A          | N/A            |
| NM_001242357.4.3          | NCR1            | chr19                  | 55420603         | 55421425         | 5                    | 137.5633        | N/A              | N/A          | N/A            |
| NM_016004.8.7             | IFT52           | chr20                  | 42242489         | 42247666         | 5                    | 137.5633        | N/A              | N/A          | N/A            |
| NM_152487.6.2             | TMEM56          | chr1                   | 95609446         | 95639445         | 5                    | 137.5633        | N/A              | N/A          | N/A            |
| NM_001146032.20.16        | FCHO2           | chr5                   | 72354259         | 72373320         | 5                    | 137.5633        | N/A              | N/A          | N/A            |
| NM_198925.4.2             | SEMA4B          | chr15                  | 90760670         | 90763123         | 5                    | 137.5633        | N/A              | N/A          | N/A            |
| NM_001195733.5.4          | PIP5K1C         | chr19                  | 3660963          | 3661999          | 5                    | 137.5633        | N/A              | N/A          | N/A            |
| NM_001282679.17.16        | GAPVD1          | chr9                   | 128099296        | 128099870        | 5                    | 137.5633        | N/A              | N/A          | N/A            |
| NM_002881.4.2             | RALB            | chr2                   | 121036193        | 121047333        | 4                    | 110.0507        | N/A              | N/A          | N/A            |
| NM_007280.4.3             | OIP5            | chr15                  | 41605470         | 41611978         | 4                    | 110.0507        | N/A              | N/A          | N/A            |
| NM_020765.9.8             | UBR4            | chr1                   | 19519926         | 19523759         | 4                    | 110.0507        | N/A              | N/A          | N/A            |

|                    |         |       |           |           |   |          |     |     |     |
|--------------------|---------|-------|-----------|-----------|---|----------|-----|-----|-----|
| NM_022039.6.2      | FBXW4   | chr10 | 103384501 | 103436193 | 4 | 110.0507 | N/A | N/A | N/A |
| NM_018449.12.9     | UBAP2   | chr9  | 33953282  | 33963789  | 4 | 110.0507 | N/A | N/A | N/A |
| NM_030802.5.4      | FAM117A | chr17 | 47797121  | 47797798  | 4 | 110.0507 | N/A | N/A | N/A |
| NM_000124.7.6      | ERCC6   | chr10 | 50708583  | 50714058  | 4 | 110.0507 | N/A | N/A | N/A |
| NM_015179.6.4      | RRP12   | chr10 | 99150179  | 99153517  | 4 | 110.0507 | N/A | N/A | N/A |
| NM_014282.5.2      | HABP4   | chr9  | 99220660  | 99233376  | 4 | 110.0507 | N/A | N/A | N/A |
| NM_001167681.4.3   | FLI1    | chr11 | 128628009 | 128638167 | 4 | 110.0507 | N/A | N/A | N/A |
| NM_213662.4.2      | STAT3   | chr17 | 40497576  | 40500557  | 4 | 110.0507 | N/A | N/A | N/A |
| NM_001146032.20.19 | FCHO2   | chr5  | 72370568  | 72373320  | 4 | 110.0507 | N/A | N/A | N/A |
| NM_001130420.25.23 | SMARCC2 | chr12 | 56563312  | 56563992  | 4 | 110.0507 | N/A | N/A | N/A |
| NM_001202504.4.2   | CTDP1   | chr18 | 77455224  | 77457988  | 4 | 110.0507 | N/A | N/A | N/A |
| NR_028075.10.9     | -       | chr17 | 1540002   | 1540356   | 4 | 110.0507 | N/A | N/A | N/A |
| NM_016293.10.10    | BIN2    | chr12 | 51685374  | 51686128  | 4 | 110.0507 | N/A | N/A | N/A |
| NM_023018.7.6      | NADK    | chr1  | 1686812   | 1687782   | 4 | 110.0507 | N/A | N/A | N/A |
| NM_000293.7.2      | PHKB    | chr16 | 47531309  | 47581459  | 4 | 110.0507 | N/A | N/A | N/A |
| NM_015226.18.11    | CLEC16A | chr16 | 11114049  | 11154879  | 4 | 110.0507 | N/A | N/A | N/A |
| NM_207123.10.7     | GAB1    | chr4  | 144378832 | 144387378 | 4 | 110.0507 | N/A | N/A | N/A |
| NM_152415.4.2      | VPS37A  | chr8  | 17123415  | 17126465  | 4 | 110.0507 | N/A | N/A | N/A |
| NR_103473.6.5      | -       | chr1  | 59811918  | 59844509  | 4 | 110.0507 | N/A | N/A | N/A |
| NM_001144072.4.2   | UBAC2   | chr13 | 99890680  | 99896878  | 4 | 110.0507 | N/A | N/A | N/A |
| NM_001146054.4.2   | SNCA    | chr4  | 90743396  | 90756843  | 4 | 110.0507 | N/A | N/A | N/A |
| NM_018359.4.3      | UFSP2   | chr4  | 186339594 | 186339924 | 3 | 82.53799 | N/A | N/A | N/A |
| NM_001002762.5.4   | DNAJB12 | chr10 | 74100546  | 74100928  | 3 | 82.53799 | N/A | N/A | N/A |
| NM_016581.4.3      | ECSIT   | chr19 | 11623870  | 11625036  | 3 | 82.53799 | N/A | N/A | N/A |
| NM_001144823.19.15 | DENND4A | chr15 | 65993388  | 65998562  | 3 | 82.53799 | N/A | N/A | N/A |
| NM_174917.8.2      | ACSF3   | chr16 | 89164998  | 89199670  | 3 | 82.53799 | N/A | N/A | N/A |
| NM_020774.10.2     | MIB1    | chr18 | 19345732  | 19383975  | 3 | 82.53799 | N/A | N/A | N/A |
| NM_080627.14.2     | SOGA1   | chr20 | 35421651  | 35467844  | 3 | 82.53799 | N/A | N/A | N/A |
| NM_001008660.7.5   | PICALM  | chr11 | 85722072  | 85726006  | 3 | 82.53799 | N/A | N/A | N/A |
| NM_016426.9.8      | GTSE1   | chr22 | 46719086  | 46722551  | 3 | 82.53799 | N/A | N/A | N/A |
| NM_004286.9.5      | GTPBP1  | chr22 | 39117746  | 39123353  | 3 | 82.53799 | N/A | N/A | N/A |
| NM_018062.5.2      | FANCL   | chr2  | 58449076  | 58459247  | 3 | 82.53799 | N/A | N/A | N/A |
| NM_015435.4.3      | RNF19A  | chr8  | 101287180 | 101300495 | 3 | 82.53799 | N/A | N/A | N/A |

|                    |           |       |           |           |   |          |     |     |     |
|--------------------|-----------|-------|-----------|-----------|---|----------|-----|-----|-----|
| NM_013448.15.12    | BAZ1A     | chr14 | 35252967  | 35262127  | 3 | 82.53799 | N/A | N/A | N/A |
| NM_002061.6.3      | GCLM      | chr1  | 94360169  | 94367225  | 3 | 82.53799 | N/A | N/A | N/A |
| NM_001172219.10.9  | SCMH1     | chr1  | 41536266  | 41541123  | 3 | 82.53799 | N/A | N/A | N/A |
| NM_101395.4.3      | DYRK1A    | chr21 | 38792600  | 38845182  | 3 | 82.53799 | N/A | N/A | N/A |
| NM_001242599.5.4   | RBM39     | chr20 | 34317233  | 34320057  | 3 | 82.53799 | N/A | N/A | N/A |
| NM_001009905.4.2   | B3GNTL1   | chr17 | 80992910  | 81006661  | 3 | 82.53799 | N/A | N/A | N/A |
| NR_037615.4.3      | -         | chr12 | 70687850  | 70704797  | 3 | 82.53799 | N/A | N/A | N/A |
| NM_001258273.14.13 | MLH1      | chr3  | 37081676  | 37083822  | 3 | 82.53799 | N/A | N/A | N/A |
| NM_138341.9.4      | TMEM116   | chr12 | 112370389 | 112381173 | 3 | 82.53799 | N/A | N/A | N/A |
| NM_022836.3.3      | DCLRE1B   | chr1  | 114450630 | 114450813 | 3 | 82.53799 | N/A | N/A | N/A |
| NM_032412.2.2      | CYSTM1    | chr5  | 139574030 | 139574237 | 3 | 82.53799 | N/A | N/A | N/A |
| NM_007010.13.10    | DDX52     | chr17 | 35979812  | 35981565  | 3 | 82.53799 | N/A | N/A | N/A |
| NM_001429.5.3      | EP300     | chr22 | 41521867  | 41526007  | 3 | 82.53799 | N/A | N/A | N/A |
| NM_006561.9.7      | CELF2     | chr10 | 11312628  | 11330515  | 3 | 82.53799 | N/A | N/A | N/A |
| NM_020314.14.13    | C16orf62  | chr16 | 19627435  | 19628130  | 3 | 82.53799 | N/A | N/A | N/A |
| NM_017643.6.3      | MBTD1     | chr17 | 49294694  | 49302570  | 3 | 82.53799 | N/A | N/A | N/A |
| NM_014972.12.6     | TCF25     | chr16 | 89958600  | 89967202  | 3 | 82.53799 | N/A | N/A | N/A |
| NM_001283032.23.19 | SCFD1     | chr14 | 31185129  | 31204064  | 3 | 82.53799 | N/A | N/A | N/A |
| NM_001282886.3.2   | EIF4E3    | chr3  | 71759562  | 71777774  | 3 | 82.53799 | N/A | N/A | N/A |
| NM_015335.4.3      | MED13L    | chr12 | 116534473 | 116549317 | 3 | 82.53799 | N/A | N/A | N/A |
| NM_015033.15.12    | FNBP1     | chr9  | 132662243 | 132671278 | 3 | 82.53799 | N/A | N/A | N/A |
| NM_024874.6.4      | KIAA0319L | chr1  | 35936463  | 35944813  | 3 | 82.53799 | N/A | N/A | N/A |
| NM_001127183.8.2   | CFLAR     | chr2  | 201994451 | 202014558 | 3 | 82.53799 | N/A | N/A | N/A |
| NM_005819.7.2      | STX6      | chr1  | 180953812 | 180974599 | 3 | 82.53799 | N/A | N/A | N/A |
| NM_024561.9.3      | NAA16     | chr13 | 41892941  | 41910892  | 3 | 82.53799 | N/A | N/A | N/A |
| NM_006836.22.10    | GCN1      | chr12 | 120599293 | 120614020 | 3 | 82.53799 | N/A | N/A | N/A |
| NM_001164759.4.2   | PRKAR1B   | chr7  | 716865    | 751164    | 3 | 82.53799 | N/A | N/A | N/A |
| NM_005993.7.3      | TBCD      | chr17 | 80721840  | 80739597  | 3 | 82.53799 | N/A | N/A | N/A |
| NM_001265612.42.40 | CNOT1     | chr16 | 58565861  | 58568299  | 3 | 82.53799 | N/A | N/A | N/A |
| NM_015013.8.3      | KDM1A     | chr1  | 23376879  | 23385660  | 3 | 82.53799 | N/A | N/A | N/A |
| NM_032206.35.32    | NLRC5     | chr16 | 57099123  | 57101740  | 3 | 82.53799 | N/A | N/A | N/A |
| NR_073585.4.2      | -         | chr17 | 61655830  | 61657304  | 3 | 82.53799 | N/A | N/A | N/A |
| NM_024948.8.2      | FAM188A   | chr10 | 15875628  | 15889942  | 3 | 82.53799 | N/A | N/A | N/A |

|                    |          |       |           |           |   |          |     |     |     |
|--------------------|----------|-------|-----------|-----------|---|----------|-----|-----|-----|
| NM_198896.6.4      | RAB6A    | chr11 | 73418464  | 73429763  | 3 | 82.53799 | N/A | N/A | N/A |
| NM_014688.14.11    | USP6NL   | chr10 | 11523768  | 11527910  | 3 | 82.53799 | N/A | N/A | N/A |
| NM_001271635.4.3   | CNOT9    | chr2  | 219447693 | 219449444 | 3 | 82.53799 | N/A | N/A | N/A |
| NM_032959.8.5      | POLR2J2  | chr7  | 102279160 | 102281220 | 3 | 82.53799 | N/A | N/A | N/A |
| NM_001163735.15.13 | MYO19    | chr17 | 34864900  | 34867294  | 3 | 82.53799 | N/A | N/A | N/A |
| NM_032156.12.9     | CAPRIN2  | chr12 | 30873744  | 30879022  | 3 | 82.53799 | N/A | N/A | N/A |
| NM_000086.6.3      | CLN3     | chr16 | 28498776  | 28500707  | 3 | 82.53799 | N/A | N/A | N/A |
| NM_032213.8.5      | ELMOD3   | chr2  | 85595808  | 85598685  | 3 | 82.53799 | N/A | N/A | N/A |
| NM_001256865.5.3   | DNAJC6   | chr1  | 65830317  | 65831879  | 3 | 82.53799 | N/A | N/A | N/A |
| NM_003262.7.3      | SEC62    | chr3  | 169694733 | 169706147 | 2 | 55.02533 | N/A | N/A | N/A |
| NM_004814.5.3      | SNRNP40  | chr1  | 31754220  | 31764853  | 2 | 55.02533 | N/A | N/A | N/A |
| NM_001178137.7.4   | CPEB3    | chr10 | 93870832  | 93940776  | 2 | 55.02533 | N/A | N/A | N/A |
| NM_001243249.7.6   | NPRL3    | chr16 | 148142    | 150507    | 2 | 55.02533 | N/A | N/A | N/A |
| NM_024789.9.8      | MFSD13A  | chr10 | 104233326 | 104233769 | 2 | 55.02533 | N/A | N/A | N/A |
| NR_033676.3.2      | -        | chrX  | 106410878 | 106418423 | 2 | 55.02533 | N/A | N/A | N/A |
| NM_007368.4.4      | RASA3    | chr13 | 114806475 | 114806570 | 2 | 55.02533 | N/A | N/A | N/A |
| NM_001127391.11.10 | ALS2CR12 | chr2  | 202172241 | 202173973 | 2 | 55.02533 | N/A | N/A | N/A |
| NM_001135190.5.3   | ARAP1    | chr11 | 72423240  | 72424288  | 2 | 55.02533 | N/A | N/A | N/A |
| NM_001172639.15.13 | CELF1    | chr11 | 47493742  | 47497073  | 2 | 55.02533 | N/A | N/A | N/A |
| NM_000052.13.11    | ATP7A    | chrX  | 77270158  | 77275895  | 2 | 55.02533 | N/A | N/A | N/A |
| NM_014173.8.7      | BABAM1   | chr19 | 17387303  | 17387718  | 2 | 55.02533 | N/A | N/A | N/A |
| NM_184234.11.7     | RBM39    | chr20 | 34302106  | 34313077  | 2 | 55.02533 | N/A | N/A | N/A |
| NM_001080432.8.5   | FTO      | chr16 | 53907697  | 53968021  | 2 | 55.02533 | N/A | N/A | N/A |
| NM_001097615.4.2   | POLR2J3  | chr7  | 102207443 | 102210371 | 2 | 55.02533 | N/A | N/A | N/A |
| NM_024074.3.2      | TMEM38A  | chr19 | 16790794  | 16791392  | 2 | 55.02533 | N/A | N/A | N/A |
| NM_001009.4.3      | RPS5     | chr19 | 58904342  | 58904854  | 2 | 55.02533 | N/A | N/A | N/A |
| NM_014949.10.8     | KIAA0907 | chr1  | 155891165 | 155893478 | 2 | 55.02533 | N/A | N/A | N/A |
| NM_025090.7.6      | USP36    | chr17 | 76818018  | 76823429  | 2 | 55.02533 | N/A | N/A | N/A |
| NM_002973.18.16    | ATXN2    | chr12 | 111923074 | 111924628 | 2 | 55.02533 | N/A | N/A | N/A |
| NM_198435.6.3      | AURKA    | chr20 | 54956488  | 54961589  | 2 | 55.02533 | N/A | N/A | N/A |
| NM_003161.12.10    | RPS6KB1  | chr17 | 58012553  | 58013902  | 2 | 55.02533 | N/A | N/A | N/A |
| NM_032410.5.3      | HOOK3    | chr8  | 42780699  | 42798588  | 2 | 55.02533 | N/A | N/A | N/A |
| NM_173083.10.9     | LIN9     | chr1  | 226453233 | 226454033 | 2 | 55.02533 | N/A | N/A | N/A |

|                    |          |       |           |           |   |          |     |     |     |
|--------------------|----------|-------|-----------|-----------|---|----------|-----|-----|-----|
| NM_002209.15.14    | ITGAL    | chr16 | 30507417  | 30507887  | 2 | 55.02533 | N/A | N/A | N/A |
| NM_004728.2.2      | DDX21    | chr10 | 70719561  | 70720005  | 2 | 55.02533 | N/A | N/A | N/A |
| NM_002756.9.2      | MAP2K3   | chr17 | 21201724  | 21208440  | 2 | 55.02533 | N/A | N/A | N/A |
| NM_005761.4.2      | PLXNC1   | chr12 | 94562928  | 94580249  | 2 | 55.02533 | N/A | N/A | N/A |
| NM_053043.5.3      | RBM33    | chr7  | 155465560 | 155473602 | 2 | 55.02533 | N/A | N/A | N/A |
| NM_212554.4.2      | METTL10  | chr10 | 126463243 | 126478907 | 2 | 55.02533 | N/A | N/A | N/A |
| NM_020122.6.4      | KCMF1    | chr2  | 85270686  | 85276771  | 2 | 55.02533 | N/A | N/A | N/A |
| NM_001013837.3.2   | MAD1L1   | chr7  | 2269618   | 2270359   | 2 | 55.02533 | N/A | N/A | N/A |
| NM_139057.6.3      | ADAMTS17 | chr15 | 100801683 | 100871259 | 2 | 55.02533 | N/A | N/A | N/A |
| NM_001110781.8.5   | SLC35E2B | chr1  | 1599765   | 1603068   | 2 | 55.02533 | N/A | N/A | N/A |
| NM_001243403.18.13 | CLEC16A  | chr16 | 11133610  | 11154879  | 2 | 55.02533 | N/A | N/A | N/A |
| NM_001134335.6.3   | EIF2AK1  | chr7  | 6085701   | 6089676   | 2 | 55.02533 | N/A | N/A | N/A |
| NM_032226.2.2      | ZCCHC7   | chr9  | 37126308  | 37126939  | 2 | 55.02533 | N/A | N/A | N/A |
| NM_001144823.3.2   | DENND4A  | chr15 | 66048477  | 66053776  | 2 | 55.02533 | N/A | N/A | N/A |
| NM_001005366.9.7   | KDM2B    | chr12 | 121958787 | 121972495 | 2 | 55.02533 | N/A | N/A | N/A |
| NM_001029880.10.5  | SFMBT2   | chr10 | 7269816   | 7327916   | 2 | 55.02533 | N/A | N/A | N/A |
| NM_138384.9.7      | MTG1     | chr10 | 135215032 | 135216277 | 2 | 55.02533 | N/A | N/A | N/A |
| NM_138571.4.3      | HINT3    | chr6  | 126293404 | 126296119 | 2 | 55.02533 | N/A | N/A | N/A |
| NM_001040033.4.3   | CD53     | chr1  | 111434013 | 111435155 | 2 | 55.02533 | N/A | N/A | N/A |
| NR_103729.8.4      | -        | chr2  | 173429230 | 173435552 | 2 | 55.02533 | N/A | N/A | N/A |
| NM_001037144.13.13 | CNTROB   | chr17 | 7849045   | 7849304   | 2 | 55.02533 | N/A | N/A | N/A |
| NM_004618.8.4      | TOP3A    | chr17 | 18205198  | 18210280  | 2 | 55.02533 | N/A | N/A | N/A |
| NM_145648.2.2      | SLC15A4  | chr12 | 129299319 | 129299615 | 2 | 55.02533 | N/A | N/A | N/A |
| NM_020732.4.4      | ARID1B   | chr6  | 157222509 | 157222659 | 2 | 55.02533 | N/A | N/A | N/A |
| NM_025000.7.4      | DCAF17   | chr2  | 172305190 | 172314585 | 2 | 55.02533 | N/A | N/A | N/A |
| NM_015172.12.8     | PRRC2C   | chr1  | 171492359 | 171502100 | 2 | 55.02533 | N/A | N/A | N/A |
| NM_001286057.2.2   | ADCY7    | chr16 | 50321822  | 50322261  | 2 | 55.02533 | N/A | N/A | N/A |
| NR_024573.8.7      | -        | chr17 | 40342202  | 40342775  | 2 | 55.02533 | N/A | N/A | N/A |
| NM_003831.7.3      | RIOK3    | chr18 | 21043930  | 21047490  | 2 | 55.02533 | N/A | N/A | N/A |
| NM_001271.26.21    | CHD2     | chr15 | 93521463  | 93528903  | 2 | 55.02533 | N/A | N/A | N/A |
| NM_003502.5.3      | AXIN1    | chr16 | 354303    | 364683    | 2 | 55.02533 | N/A | N/A | N/A |
| NM_001002264.9.2   | EPSTI1   | chr13 | 43491676  | 43544806  | 2 | 55.02533 | N/A | N/A | N/A |
| NM_194313.6.5      | KIF24    | chr9  | 34286614  | 34290387  | 2 | 55.02533 | N/A | N/A | N/A |

|                    |         |       |           |           |   |          |     |     |     |
|--------------------|---------|-------|-----------|-----------|---|----------|-----|-----|-----|
| NM_033000.25.23    | GTF2I   | chr7  | 74162351  | 74163788  | 2 | 55.02533 | N/A | N/A | N/A |
| NM_001184856.4.2   | KLHDC4  | chr16 | 87788799  | 87795646  | 2 | 55.02533 | N/A | N/A | N/A |
| NM_021644.6.2      | HNRNPH3 | chr10 | 70096955  | 70099312  | 2 | 55.02533 | N/A | N/A | N/A |
| NM_030938.7.6      | VMP1    | chr17 | 57842331  | 57851246  | 2 | 55.02533 | N/A | N/A | N/A |
| NR_037663.4.3      | -       | chr1  | 202126866 | 202127376 | 2 | 55.02533 | N/A | N/A | N/A |
| NM_015132.5.2      | SNX13   | chr7  | 17929985  | 17937069  | 2 | 55.02533 | N/A | N/A | N/A |
| NM_199420.7.6      | POLQ    | chr3  | 121248491 | 121252056 | 2 | 55.02533 | N/A | N/A | N/A |
| NM_001286760.11.10 | CERCAM  | chr9  | 131196380 | 131196892 | 2 | 55.02533 | N/A | N/A | N/A |
| NM_001136123.12.10 | SLF2    | chr10 | 102697158 | 102703885 | 2 | 55.02533 | N/A | N/A | N/A |
| NM_004333.8.4      | BRAF    | chr7  | 140494107 | 140508795 | 2 | 55.02533 | N/A | N/A | N/A |
| NM_020401.12.11    | NUP107  | chr12 | 69107509  | 69109520  | 2 | 55.02533 | N/A | N/A | N/A |
| NM_001725.10.10    | BPI     | chr20 | 36954666  | 36954834  | 2 | 55.02533 | N/A | N/A | N/A |
| NM_017652.2.2      | ZNF586  | chr19 | 58287910  | 58288037  | 2 | 55.02533 | N/A | N/A | N/A |
| NM_001145160.6.5   | TPM4    | chr19 | 16198836  | 16199930  | 2 | 55.02533 | N/A | N/A | N/A |
| NM_015172.25.23    | PRRC2C  | chr1  | 171537385 | 171544267 | 2 | 55.02533 | N/A | N/A | N/A |
| NM_030647.5.3      | KDM7A   | chr7  | 139827241 | 139833456 | 2 | 55.02533 | N/A | N/A | N/A |
| NM_001100399.9.5   | PDS5A   | chr4  | 39915230  | 39927553  | 2 | 55.02533 | N/A | N/A | N/A |
| NM_194332.2.2      | RNF38   | chr9  | 36375930  | 36376124  | 2 | 55.02533 | N/A | N/A | N/A |
| NM_001278716.7.5   | FBXL4   | chr6  | 99347143  | 99365595  | 2 | 55.02533 | N/A | N/A | N/A |
| NM_015446.29.28    | AHCTF1  | chr1  | 247024200 | 247025455 | 2 | 55.02533 | N/A | N/A | N/A |
| NM_001288955.5.4   | TTC7A   | chr2  | 47202111  | 47206046  | 2 | 55.02533 | N/A | N/A | N/A |
| NM_001080543.2.2   | CACTIN  | chr19 | 3623685   | 3624160   | 2 | 55.02533 | N/A | N/A | N/A |
| NM_001142936.5.3   | DAGLB   | chr7  | 6465618   | 6476164   | 2 | 55.02533 | N/A | N/A | N/A |
| NR_037947.5.4      | -       | chr5  | 6623326   | 6625782   | 2 | 55.02533 | N/A | N/A | N/A |
| NM_203447.18.16    | DOCK8   | chr9  | 370229    | 372286    | 2 | 55.02533 | N/A | N/A | N/A |
| NM_015865.8.7      | SLC14A1 | chr18 | 43319127  | 43319627  | 2 | 55.02533 | N/A | N/A | N/A |
| NM_001128210.5.5   | SPRED2  | chr2  | 65543867  | 65544017  | 2 | 55.02533 | N/A | N/A | N/A |
| NM_022897.5.2      | RANBP17 | chr5  | 170305100 | 170323119 | 2 | 55.02533 | N/A | N/A | N/A |
| NM_014671.5.2      | UBE3C   | chr7  | 156956503 | 156967728 | 2 | 55.02533 | N/A | N/A | N/A |
| NM_001242837.16.15 | AP2A2   | chr11 | 1000431   | 1003804   | 2 | 55.02533 | N/A | N/A | N/A |
| NM_005356.12.10    | LCK     | chr1  | 32745271  | 32745811  | 2 | 55.02533 | N/A | N/A | N/A |
| NM_000081.44.41    | LYST    | chr1  | 235872390 | 235880078 | 2 | 55.02533 | N/A | N/A | N/A |
| NM_183004.9.4      | EIF5    | chr14 | 103803013 | 103806140 | 2 | 55.02533 | N/A | N/A | N/A |

|                    |          |       |           |           |   |          |     |     |     |
|--------------------|----------|-------|-----------|-----------|---|----------|-----|-----|-----|
| NM_001265612.18.17 | CNOT1    | chr16 | 58592376  | 58594266  | 2 | 55.02533 | N/A | N/A | N/A |
| NM_001205206.5.3   | SLC19A1  | chr21 | 46945730  | 46952062  | 2 | 55.02533 | N/A | N/A | N/A |
| NM_173797.13.6     | PAPD4    | chr5  | 78936673  | 78964851  | 2 | 55.02533 | N/A | N/A | N/A |
| NM_020761.20.18    | RPTOR    | chr17 | 78865519  | 78867665  | 2 | 55.02533 | N/A | N/A | N/A |
| NM_025150.13.11    | TARS2    | chr1  | 150470977 | 150471769 | 2 | 55.02533 | N/A | N/A | N/A |
| NM_001093.46.45    | ACACB    | chr12 | 109696072 | 109696913 | 2 | 55.02533 | N/A | N/A | N/A |
| NM_001136196.9.5   | TNPO2    | chr19 | 12825634  | 12826553  | 2 | 55.02533 | N/A | N/A | N/A |
| NM_001109662.55.44 | HECTD4   | chr12 | 112638441 | 112664562 | 2 | 55.02533 | N/A | N/A | N/A |
| NM_001256399.6.3   | ELOVL1   | chr1  | 43830212  | 43831047  | 2 | 55.02533 | N/A | N/A | N/A |
| NM_014960.10.9     | ARSG     | chr17 | 66381204  | 66391334  | 2 | 55.02533 | N/A | N/A | N/A |
| NM_003370.3.2      | VASP     | chr19 | 46020920  | 46021352  | 2 | 55.02533 | N/A | N/A | N/A |
| NM_152586.5.4      | USP54    | chr10 | 75302560  | 75302889  | 2 | 55.02533 | N/A | N/A | N/A |
| NM_001024210.3.2   | S100A13  | chr1  | 153603486 | 153604716 | 2 | 55.02533 | N/A | N/A | N/A |
| NM_001002860.4.4   | BTBD7    | chr14 | 93730130  | 93730339  | 2 | 55.02533 | N/A | N/A | N/A |
| NM_025160.7.4      | WDR26    | chr1  | 224599128 | 224612356 | 2 | 55.02533 | N/A | N/A | N/A |
| NM_001080432.5.4   | FTO      | chr16 | 53878066  | 53907777  | 2 | 55.02533 | N/A | N/A | N/A |
| NM_001080449.3.2   | DNA2     | chr10 | 70227879  | 70229920  | 2 | 55.02533 | N/A | N/A | N/A |
| NM_001145811.7.4   | SOX6     | chr11 | 16133348  | 16256217  | 2 | 55.02533 | N/A | N/A | N/A |
| NM_001145811.7.5   | SOX6     | chr11 | 16133348  | 16208501  | 2 | 55.02533 | N/A | N/A | N/A |
| NM_004529.8.6      | MLLT3    | chr9  | 20360739  | 20365742  | 2 | 55.02533 | N/A | N/A | N/A |
| NM_006312.13.8     | NCOR2    | chr12 | 124911167 | 124941708 | 2 | 55.02533 | N/A | N/A | N/A |
| NM_001282983.7.5   | FARP2    | chr2  | 242346951 | 242352836 | 2 | 55.02533 | N/A | N/A | N/A |
| NM_001417.8.5      | EIF4B    | chr12 | 53415589  | 53421972  | 2 | 55.02533 | N/A | N/A | N/A |
| NM_194260.6.2      | UBE2I    | chr16 | 1364020   | 1370518   | 2 | 55.02533 | N/A | N/A | N/A |
| NM_006854.4.4      | KDELR2   | chr7  | 6505701   | 6505954   | 2 | 55.02533 | N/A | N/A | N/A |
| NM_007368.3.2      | RASA3    | chr13 | 114817526 | 114839312 | 1 | 27.51266 | N/A | N/A | N/A |
| NM_024541.8.3      | C10orf76 | chr10 | 103783233 | 103793096 | 1 | 27.51266 | N/A | N/A | N/A |
| NM_030581.13.3     | WDR59    | chr16 | 74949767  | 74990508  | 1 | 27.51266 | N/A | N/A | N/A |
| NM_138572.7.6      | TAF8     | chr6  | 42034049  | 42036345  | 1 | 27.51266 | N/A | N/A | N/A |
| NM_016316.4.2      | REV1     | chr2  | 100065797 | 100081447 | 1 | 27.51266 | N/A | N/A | N/A |
| NM_013236.6.2      | ATXN10   | chr22 | 46085591  | 46114373  | 1 | 27.51266 | N/A | N/A | N/A |
| NM_001376.69.63    | DYNC1H1  | chr14 | 102506572 | 102509085 | 1 | 27.51266 | N/A | N/A | N/A |
| NM_003489.2.2      | NRIP1    | chr21 | 16415815  | 16415895  | 1 | 27.51266 | N/A | N/A | N/A |

|                    |          |       |           |           |   |          |     |     |     |
|--------------------|----------|-------|-----------|-----------|---|----------|-----|-----|-----|
| NM_018706.6.2      | DHTKD1   | chr10 | 12123470  | 12133683  | 1 | 27.51266 | N/A | N/A | N/A |
| NM_004939.13.8     | DDX1     | chr2  | 15743315  | 15747437  | 1 | 27.51266 | N/A | N/A | N/A |
| NM_000188.15.13    | HK1      | chr10 | 71146078  | 71152064  | 1 | 27.51266 | N/A | N/A | N/A |
| NM_005848.28.25    | DENND4A  | chr15 | 65959786  | 65962526  | 1 | 27.51266 | N/A | N/A | N/A |
| NM_002074.7.4      | GNB1     | chr1  | 1735857   | 1749314   | 1 | 27.51266 | N/A | N/A | N/A |
| NM_001256827.3.2   | SMG6     | chr17 | 2139785   | 2148013   | 1 | 27.51266 | N/A | N/A | N/A |
| NR_052013.12.9     | -        | chr2  | 15629017  | 15674765  | 1 | 27.51266 | N/A | N/A | N/A |
| NM_014826.22.21    | CDC42BPA | chr1  | 227227831 | 227235711 | 1 | 27.51266 | N/A | N/A | N/A |
| NM_006600.6.5      | NUDC     | chr1  | 27269150  | 27269556  | 1 | 27.51266 | N/A | N/A | N/A |
| NM_014826.22.20    | CDC42BPA | chr1  | 227227831 | 227257554 | 1 | 27.51266 | N/A | N/A | N/A |
| NM_012455.10.3     | PSD4     | chr2  | 113942533 | 113951525 | 1 | 27.51266 | N/A | N/A | N/A |
| NM_002830.13.12    | PTPN4    | chr2  | 120677644 | 120684242 | 1 | 27.51266 | N/A | N/A | N/A |
| NM_004796.11.8     | NRXN3    | chr14 | 79423584  | 79434689  | 1 | 27.51266 | N/A | N/A | N/A |
| NR_073136.12.11    | -        | chr22 | 26853824  | 26854543  | 1 | 27.51266 | N/A | N/A | N/A |
| NR_104486.13.9     | -        | chr13 | 21955572  | 21965993  | 1 | 27.51266 | N/A | N/A | N/A |
| NM_001242599.9.6   | RBM39    | chr20 | 34304661  | 34313077  | 1 | 27.51266 | N/A | N/A | N/A |
| NM_001136554.12.3  | TLK1     | chr2  | 171884848 | 171939362 | 1 | 27.51266 | N/A | N/A | N/A |
| NM_015578.6.5      | LSM14A   | chr19 | 34706028  | 34706566  | 1 | 27.51266 | N/A | N/A | N/A |
| NM_015255.42.39    | UBR2     | chr6  | 42643793  | 42647570  | 1 | 27.51266 | N/A | N/A | N/A |
| NM_006283.8.7      | TACC1    | chr8  | 38693679  | 38696064  | 1 | 27.51266 | N/A | N/A | N/A |
| NM_001009993.3.2   | FAM168B  | chr2  | 131829427 | 131840230 | 1 | 27.51266 | N/A | N/A | N/A |
| NM_013438.6.2      | UBQLN1   | chr9  | 86292641  | 86301070  | 1 | 27.51266 | N/A | N/A | N/A |
| NM_006401.4.2      | ANP32B   | chr9  | 100756912 | 100767435 | 1 | 27.51266 | N/A | N/A | N/A |
| NM_174916.46.41    | UBR1     | chr15 | 43242459  | 43258484  | 1 | 27.51266 | N/A | N/A | N/A |
| NM_022153.4.2      | C10orf54 | chr10 | 73515115  | 73521783  | 1 | 27.51266 | N/A | N/A | N/A |
| NM_001282873.54.48 | UBR5     | chr8  | 103276701 | 103285000 | 1 | 27.51266 | N/A | N/A | N/A |
| NM_024622.11.9     | FASTKD1  | chr2  | 170394522 | 170401345 | 1 | 27.51266 | N/A | N/A | N/A |
| NM_001080495.21.20 | TNRC18   | chr7  | 5363844   | 5364879   | 1 | 27.51266 | N/A | N/A | N/A |
| NM_018442.4.3      | DCAF6    | chr1  | 167935866 | 167944253 | 1 | 27.51266 | N/A | N/A | N/A |
| NM_015327.7.6      | SMG5     | chr1  | 156242110 | 156243241 | 1 | 27.51266 | N/A | N/A | N/A |
| NM_001655.5.2      | ARCN1    | chr11 | 118451960 | 118455359 | 1 | 27.51266 | N/A | N/A | N/A |
| NM_003101.9.7      | SOAT1    | chr1  | 179310162 | 179312078 | 1 | 27.51266 | N/A | N/A | N/A |
| NM_001130028.12.5  | CLK3     | chr15 | 74914834  | 74921373  | 1 | 27.51266 | N/A | N/A | N/A |



|                    |          |       |           |           |   |          |     |     |     |
|--------------------|----------|-------|-----------|-----------|---|----------|-----|-----|-----|
| NM_017508.8.7      | SOX6     | chr11 | 16119154  | 16133469  | 1 | 27.51266 | N/A | N/A | N/A |
| NM_032389.15.11    | ARFGAP2  | chr11 | 47187818  | 47189802  | 1 | 27.51266 | N/A | N/A | N/A |
| NM_057175.9.8      | NAA15    | chr4  | 140272344 | 140272765 | 1 | 27.51266 | N/A | N/A | N/A |
| NM_005993.19.15    | TBCD     | chr17 | 80842020  | 80861354  | 1 | 27.51266 | N/A | N/A | N/A |
| NM_001009905.6.2   | B3GNTL1  | chr17 | 80962990  | 81006661  | 1 | 27.51266 | N/A | N/A | N/A |
| NR_073029.6.2      | -        | chr10 | 51606987  | 51620382  | 1 | 27.51266 | N/A | N/A | N/A |
| NM_005548.3.2      | KARS     | chr16 | 75674081  | 75675621  | 1 | 27.51266 | N/A | N/A | N/A |
| NM_001099432.23.21 | BCAS3    | chr17 | 59152280  | 59161925  | 1 | 27.51266 | N/A | N/A | N/A |
| NM_001281734.6.4   | ZFYVE1   | chr14 | 73445568  | 73460065  | 1 | 27.51266 | N/A | N/A | N/A |
| NM_199141.4.3      | CARM1    | chr19 | 11018714  | 11019883  | 1 | 27.51266 | N/A | N/A | N/A |
| NM_020120.40.38    | UGGT1    | chr2  | 128941248 | 128945188 | 1 | 27.51266 | N/A | N/A | N/A |
| NM_002792.4.2      | PSMA7    | chr20 | 60714130  | 60716000  | 1 | 27.51266 | N/A | N/A | N/A |
| NM_000218.6.3      | KCNQ1    | chr11 | 2591857   | 2594216   | 1 | 27.51266 | N/A | N/A | N/A |
| NM_003905.11.5     | NAE1     | chr16 | 66850483  | 66857503  | 1 | 27.51266 | N/A | N/A | N/A |
| NM_018622.9.8      | PARL     | chr3  | 183551279 | 183551613 | 1 | 27.51266 | N/A | N/A | N/A |
| NM_001288733.2.2   | TEX2     | chr17 | 62289933  | 62291602  | 1 | 27.51266 | N/A | N/A | N/A |
| NM_004713.26.17    | NEMF     | chr14 | 50262508  | 50281575  | 1 | 27.51266 | N/A | N/A | N/A |
| NM_016733.4.2      | LIMK2    | chr22 | 31654276  | 31656063  | 1 | 27.51266 | N/A | N/A | N/A |
| NM_001128148.16.14 | TFRC     | chr3  | 195785154 | 195787118 | 1 | 27.51266 | N/A | N/A | N/A |
| NM_001242614.4.3   | CD99L2   | chrX  | 149983334 | 149984551 | 1 | 27.51266 | N/A | N/A | N/A |
| NM_001104546.13.12 | RPP30    | chr10 | 92661999  | 92663033  | 1 | 27.51266 | N/A | N/A | N/A |
| NR_033265.7.5      | -        | chr17 | 80361812  | 80364358  | 1 | 27.51266 | N/A | N/A | N/A |
| NM_002741.9.8      | PKN1     | chr19 | 14568842  | 14569187  | 1 | 27.51266 | N/A | N/A | N/A |
| NM_153207.4.2      | AEBP2    | chr12 | 19615443  | 19646920  | 1 | 27.51266 | N/A | N/A | N/A |
| NM_016823.2.2      | CRK      | chr17 | 1339913   | 1340449   | 1 | 27.51266 | N/A | N/A | N/A |
| NM_133259.30.28    | LRPPRC   | chr2  | 44139570  | 44145537  | 1 | 27.51266 | N/A | N/A | N/A |
| NM_001242361.9.6   | NRDC     | chr1  | 52289335  | 52299842  | 1 | 27.51266 | N/A | N/A | N/A |
| NM_019009.5.2      | TOLLIP   | chr11 | 1307231   | 1317024   | 1 | 27.51266 | N/A | N/A | N/A |
| NM_001429.10.6     | EP300    | chr22 | 41527391  | 41537226  | 1 | 27.51266 | N/A | N/A | N/A |
| NM_183009.6.3      | KIAA1429 | chr8  | 95543190  | 95550574  | 1 | 27.51266 | N/A | N/A | N/A |
| NM_001190440.39.37 | NCOR1    | chr17 | 15960827  | 15961913  | 1 | 27.51266 | N/A | N/A | N/A |
| NM_024959.11.9     | SLC8B1   | chr12 | 113753139 | 113754806 | 1 | 27.51266 | N/A | N/A | N/A |
| NM_139244.4.2      | STXBP5   | chr6  | 147527106 | 147560406 | 1 | 27.51266 | N/A | N/A | N/A |

|                    |          |       |           |           |   |          |     |     |     |
|--------------------|----------|-------|-----------|-----------|---|----------|-----|-----|-----|
| NM_002501.8.3      | NFIX     | chr19 | 13183860  | 13192669  | 1 | 27.51266 | N/A | N/A | N/A |
| NM_001277323.2.2   | NPIPA3   | chr16 | 14849048  | 14849177  | 1 | 27.51266 | N/A | N/A | N/A |
| NM_139179.9.8      | DAGLB    | chr7  | 6461357   | 6464466   | 1 | 27.51266 | N/A | N/A | N/A |
| NM_001130007.11.10 | GSPT1    | chr16 | 11976871  | 11979131  | 1 | 27.51266 | N/A | N/A | N/A |
| NM_016377.5.3      | AKAP7    | chr6  | 131481198 | 131490413 | 1 | 27.51266 | N/A | N/A | N/A |
| NM_000254.8.2      | MTR      | chr1  | 236966727 | 236979843 | 1 | 27.51266 | N/A | N/A | N/A |
| NM_001397.10.8     | ECE1     | chr1  | 21571481  | 21582631  | 1 | 27.51266 | N/A | N/A | N/A |
| NM_001242879.8.6   | ELP2     | chr18 | 33724901  | 33726344  | 1 | 27.51266 | N/A | N/A | N/A |
| NM_203500.3.3      | KEAP1    | chr19 | 10602252  | 10602938  | 1 | 27.51266 | N/A | N/A | N/A |
| NM_018449.13.9     | UBAP2    | chr9  | 33948371  | 33963789  | 1 | 27.51266 | N/A | N/A | N/A |
| NR_104293.6.2      | -        | chr16 | 89164998  | 89180895  | 1 | 27.51266 | N/A | N/A | N/A |
| NM_032482.19.17    | DOT1L    | chr19 | 2213537   | 2214595   | 1 | 27.51266 | N/A | N/A | N/A |
| NM_001256.8.5      | CDC27    | chr17 | 45232037  | 45235669  | 1 | 27.51266 | N/A | N/A | N/A |
| NM_005028.3.2      | PIP4K2A  | chr10 | 22896855  | 22898646  | 1 | 27.51266 | N/A | N/A | N/A |
| NM_024946.6.2      | FAM192A  | chr16 | 57197912  | 57207781  | 1 | 27.51266 | N/A | N/A | N/A |
| NM_024959.10.9     | SLC8B1   | chr12 | 113754330 | 113754806 | 1 | 27.51266 | N/A | N/A | N/A |
| NM_002689.17.14    | POLA2    | chr11 | 65061623  | 65063461  | 1 | 27.51266 | N/A | N/A | N/A |
| NM_199185.6.3      | NPM1     | chr5  | 170818308 | 170819982 | 1 | 27.51266 | N/A | N/A | N/A |
| NM_001206702.8.3   | SP100    | chr2  | 231307651 | 231314970 | 1 | 27.51266 | N/A | N/A | N/A |
| NM_003611.12.9     | OFD1     | chrX  | 13767545  | 13773361  | 1 | 27.51266 | N/A | N/A | N/A |
| NM_001001890.4.3   | RUNX1    | chr21 | 36206706  | 36231875  | 1 | 27.51266 | N/A | N/A | N/A |
| NM_001130955.4.4   | ARHGEF18 | chr19 | 7509089   | 7509340   | 1 | 27.51266 | N/A | N/A | N/A |
| NM_001429.6.3      | EP300    | chr22 | 41521867  | 41527637  | 1 | 27.51266 | N/A | N/A | N/A |
| NM_002745.6.4      | MAPK1    | chr22 | 22142545  | 22153417  | 1 | 27.51266 | N/A | N/A | N/A |
| NR_002824.8.3      | -        | chr15 | 23330886  | 23356220  | 1 | 27.51266 | N/A | N/A | N/A |
| NM_013318.2.1      | PRRC2B   | chr9  | 134305476 | 134308181 | 1 | 27.51266 | N/A | N/A | N/A |
| NM_001159643.13.8  | MCTP2    | chr15 | 94899365  | 94928754  | 1 | 27.51266 | N/A | N/A | N/A |
| NM_018449.12.2     | UBAP2    | chr9  | 33953282  | 34017187  | 1 | 27.51266 | N/A | N/A | N/A |
| NM_013438.3.2      | UBQLN1   | chr9  | 86297865  | 86301070  | 1 | 27.51266 | N/A | N/A | N/A |
| NM_032204.4.2      | ASCC2    | chr22 | 30221075  | 30228331  | 1 | 27.51266 | N/A | N/A | N/A |
| NM_017964.5.3      | SLC30A6  | chr2  | 32399131  | 32409407  | 1 | 27.51266 | N/A | N/A | N/A |
| NM_021813.4.2      | BACH2    | chr6  | 90916287  | 90981660  | 1 | 27.51266 | N/A | N/A | N/A |
| NM_018263.7.5      | ASXL2    | chr2  | 25990451  | 25994409  | 1 | 27.51266 | N/A | N/A | N/A |

|                    |          |       |           |           |   |          |     |     |     |
|--------------------|----------|-------|-----------|-----------|---|----------|-----|-----|-----|
| NM_001166007.11.10 | EPB41    | chr1  | 29362337  | 29365938  | 1 | 27.51266 | N/A | N/A | N/A |
| NM_021639.10.7     | GPBP1L1  | chr1  | 46099160  | 46108171  | 1 | 27.51266 | N/A | N/A | N/A |
| NM_022140.4.2      | EPB41L4A | chr5  | 111611022 | 111643187 | 1 | 27.51266 | N/A | N/A | N/A |
| NM_032206.2.1      | NLRC5    | chr16 | 57050985  | 57054919  | 1 | 27.51266 | N/A | N/A | N/A |
| NM_001083893.16.13 | STRN3    | chr14 | 31371741  | 31380368  | 1 | 27.51266 | N/A | N/A | N/A |
| NM_015016.20.17    | MAST3    | chr19 | 18246549  | 18252825  | 1 | 27.51266 | N/A | N/A | N/A |
| NM_139132.14.14    | NUP98    | chr11 | 3752620   | 3752808   | 1 | 27.51266 | N/A | N/A | N/A |
| NM_005154.5.5      | USP8     | chr15 | 50751196  | 50751359  | 1 | 27.51266 | N/A | N/A | N/A |
| NM_002270.6.5      | TNPO1    | chr5  | 72157634  | 72161556  | 1 | 27.51266 | N/A | N/A | N/A |
| NM_014946.7.4      | SPAST    | chr2  | 32323864  | 32341281  | 1 | 27.51266 | N/A | N/A | N/A |
| NM_024821.5.2      | CCDC134  | chr22 | 42204878  | 42209449  | 1 | 27.51266 | N/A | N/A | N/A |
| NR_003655.4.2      | -        | chr7  | 44053191  | 44056122  | 1 | 27.51266 | N/A | N/A | N/A |
| NM_001202504.12.11 | CTDP1    | chr18 | 77488906  | 77496521  | 1 | 27.51266 | N/A | N/A | N/A |
| NM_014756.26.21    | CKAP5    | chr11 | 46791512  | 46800149  | 1 | 27.51266 | N/A | N/A | N/A |
| NM_014991.5.2      | WDFY3    | chr4  | 85771054  | 85853516  | 1 | 27.51266 | N/A | N/A | N/A |
| NM_001097616.7.2   | -        | chr1  | 145884854 | 145919047 | 1 | 27.51266 | N/A | N/A | N/A |
| NM_001167681.6.3   | FLI1     | chr11 | 128628009 | 128651918 | 1 | 27.51266 | N/A | N/A | N/A |
| NM_007348.4.2      | ATF6     | chr1  | 161748033 | 161753886 | 1 | 27.51266 | N/A | N/A | N/A |
| NM_001145819.13.8  | SOX6     | chr11 | 16036487  | 16119234  | 1 | 27.51266 | N/A | N/A | N/A |
| NM_001039570.7.6   | KREMEN1  | chr22 | 29533329  | 29534770  | 1 | 27.51266 | N/A | N/A | N/A |
| NM_145648.7.2      | SLC15A4  | chr12 | 129283803 | 129299615 | 1 | 27.51266 | N/A | N/A | N/A |
| NM_001105562.17.15 | UBE4B    | chr1  | 10192426  | 10197263  | 1 | 27.51266 | N/A | N/A | N/A |
| NR_002612.8.5      | -        | chr13 | 50571209  | 50618904  | 1 | 27.51266 | N/A | N/A | N/A |
| NM_001134651.6.3   | EIF4E3   | chr3  | 71739160  | 71748859  | 1 | 27.51266 | N/A | N/A | N/A |
| NM_001161346.12.11 | CHFR     | chr12 | 133428203 | 133430159 | 1 | 27.51266 | N/A | N/A | N/A |
| NR_003187.4.3      | -        | chr7  | 74582341  | 74582682  | 1 | 27.51266 | N/A | N/A | N/A |
| NM_018231.11.7     | SLC38A7  | chr16 | 58704016  | 58710250  | 1 | 27.51266 | N/A | N/A | N/A |
| NR_023361.3.2      | -        | chr15 | 90431752  | 90432372  | 1 | 27.51266 | N/A | N/A | N/A |
| NM_018107.4.2      | RBM23    | chr14 | 23375403  | 23380612  | 1 | 27.51266 | N/A | N/A | N/A |
| NM_001286577.9.6   | C2CD3    | chr11 | 73829272  | 73844602  | 1 | 27.51266 | N/A | N/A | N/A |
| NM_005093.6.5      | CBFA2T2  | chr20 | 32207322  | 32211102  | 1 | 27.51266 | N/A | N/A | N/A |
| NM_007348.12.10    | ATF6     | chr1  | 161816238 | 161823113 | 1 | 27.51266 | N/A | N/A | N/A |
| NM_001684.18.12    | ATP2B4   | chr1  | 203680004 | 203691817 | 1 | 27.51266 | N/A | N/A | N/A |

|                   |         |       |           |           |   |          |     |     |     |
|-------------------|---------|-------|-----------|-----------|---|----------|-----|-----|-----|
| NM_002439.12.8    | MSH3    | chr5  | 79974745  | 80040434  | 1 | 27.51266 | N/A | N/A | N/A |
| NM_020925.20.19   | CACHD1  | chr1  | 65139030  | 65141244  | 1 | 27.51266 | N/A | N/A | N/A |
| NM_005845.19.14   | ABCC4   | chr13 | 95813442  | 95822882  | 1 | 27.51266 | N/A | N/A | N/A |
| NR_003187.5.3     | -       | chr7  | 74580928  | 74582682  | 1 | 27.51266 | N/A | N/A | N/A |
| NM_198433.8.6     | AURKA   | chr20 | 54956488  | 54959380  | 1 | 27.51266 | N/A | N/A | N/A |
| NM_138714.15.15   | NFAT5   | chr16 | 69729038  | 69729282  | 1 | 27.51266 | N/A | N/A | N/A |
| NM_005561.4.2     | LAMP1   | chr13 | 113960799 | 113965182 | 1 | 27.51266 | N/A | N/A | N/A |
| NM_002398.9.7     | MEIS1   | chr2  | 66691240  | 66775151  | 1 | 27.51266 | N/A | N/A | N/A |
| NM_133174.3.2     | APBB3   | chr5  | 139943178 | 139943500 | 1 | 27.51266 | N/A | N/A | N/A |
| NM_024857.19.11   | ATAD5   | chr17 | 29192721  | 29214390  | 1 | 27.51266 | N/A | N/A | N/A |
| NM_001784.11.10   | ADGRE5  | chr19 | 14513408  | 14515374  | 1 | 27.51266 | N/A | N/A | N/A |
| NM_003627.11.9    | SLC43A1 | chr11 | 57258696  | 57259335  | 1 | 27.51266 | N/A | N/A | N/A |
| NM_001261401.4.2  | TSN     | chr2  | 122514815 | 122519100 | 1 | 27.51266 | N/A | N/A | N/A |
| NM_001256356.2.2  | UBE2L3  | chr22 | 21965145  | 21965332  | 1 | 27.51266 | N/A | N/A | N/A |
| NM_006184.7.5     | NUCB1   | chr19 | 49414405  | 49416821  | 1 | 27.51266 | N/A | N/A | N/A |
| NM_015168.9.7     | ZC3H4   | chr19 | 47587601  | 47588671  | 1 | 27.51266 | N/A | N/A | N/A |
| NM_152564.29.27   | VPS13B  | chr8  | 100515063 | 100523740 | 1 | 27.51266 | N/A | N/A | N/A |
| NM_001033553.14.8 | SPECC1  | chr17 | 20149238  | 20209395  | 1 | 27.51266 | N/A | N/A | N/A |
| NM_000713.3.2     | BLVRB   | chr19 | 40964061  | 40964452  | 1 | 27.51266 | N/A | N/A | N/A |
| NM_004371.8.6     | COPA    | chr1  | 160293220 | 160302347 | 1 | 27.51266 | N/A | N/A | N/A |
| NM_022662.9.9     | ANAPC1  | chr2  | 112621251 | 112621472 | 1 | 27.51266 | N/A | N/A | N/A |
| NM_152713.6.4     | STT3A   | chr11 | 125472197 | 125474142 | 1 | 27.51266 | N/A | N/A | N/A |
| NM_138392.12.10   | SHKBP1  | chr19 | 41088256  | 41089623  | 1 | 27.51266 | N/A | N/A | N/A |
| NM_016334.7.2     | GPR89B  | chr1  | 147408740 | 147426634 | 1 | 27.51266 | N/A | N/A | N/A |
| NM_024770.5.4     | METTL8  | chr2  | 172193962 | 172196064 | 1 | 27.51266 | N/A | N/A | N/A |
| NM_012318.11.7    | LETM1   | chr4  | 1821064   | 1827410   | 1 | 27.51266 | N/A | N/A | N/A |
| NM_152609.2.2     | CNST    | chr1  | 246754813 | 246755243 | 1 | 27.51266 | N/A | N/A | N/A |
| NM_013379.3.2     | DPP7    | chr9  | 140008694 | 140009028 | 1 | 27.51266 | N/A | N/A | N/A |
| NM_001114380.9.6  | ITGAL   | chr16 | 30495147  | 30500707  | 1 | 27.51266 | N/A | N/A | N/A |
| NM_147782.4.2     | CTSB    | chr8  | 11710118  | 11721972  | 1 | 27.51266 | N/A | N/A | N/A |
| NM_001284401.7.6  | TAMM41  | chr3  | 11849306  | 11851156  | 1 | 27.51266 | N/A | N/A | N/A |
| NM_007194.4.3     | CHEK2   | chr22 | 29120964  | 29121355  | 1 | 27.51266 | N/A | N/A | N/A |
| NM_016172.7.5     | UBAC1   | chr9  | 138836873 | 138838217 | 1 | 27.51266 | N/A | N/A | N/A |

|                   |          |       |           |           |   |          |     |     |     |
|-------------------|----------|-------|-----------|-----------|---|----------|-----|-----|-----|
| NR_048548.4.4     | -        | chr1  | 44474024  | 44474295  | 1 | 27.51266 | N/A | N/A | N/A |
| NM_005415.5.4     | SLC20A1  | chr2  | 113405229 | 113410375 | 1 | 27.51266 | N/A | N/A | N/A |
| NM_173822.5.4     | FAM126B  | chr2  | 201881713 | 201887655 | 1 | 27.51266 | N/A | N/A | N/A |
| NM_003105.5.3     | SORL1    | chr11 | 121348826 | 121360819 | 1 | 27.51266 | N/A | N/A | N/A |
| NM_001289.3.2     | CLIC2    | chrX  | 154528097 | 154528458 | 1 | 27.51266 | N/A | N/A | N/A |
| NM_194460.4.2     | RNF126   | chr19 | 651610    | 652884    | 1 | 27.51266 | N/A | N/A | N/A |
| NM_173822.5.3     | FAM126B  | chr2  | 201881713 | 201888762 | 1 | 27.51266 | N/A | N/A | N/A |
| NM_001145440.5.5  | TYW1B    | chr7  | 72277658  | 72277949  | 1 | 27.51266 | N/A | N/A | N/A |
| NM_022140.9.2     | EPB41L4A | chr5  | 111594925 | 111643187 | 1 | 27.51266 | N/A | N/A | N/A |
| NM_054027.9.3     | ANKH     | chr5  | 14716814  | 14758707  | 1 | 27.51266 | N/A | N/A | N/A |
| NM_018449.6.2     | UBAP2    | chr9  | 33986757  | 34017187  | 1 | 27.51266 | N/A | N/A | N/A |
| NM_005192.5.2     | CDKN3    | chr14 | 54866611  | 54878424  | 1 | 27.51266 | N/A | N/A | N/A |
| NM_021994.2.2     | ZNF277   | chr7  | 111926927 | 111927129 | 1 | 27.51266 | N/A | N/A | N/A |
| NM_012138.8.5     | AATF     | chr17 | 35343915  | 35348156  | 1 | 27.51266 | N/A | N/A | N/A |
| NM_003234.4.3     | TFRC     | chr3  | 195800800 | 195802231 | 1 | 27.51266 | N/A | N/A | N/A |
| NM_001033553.12.8 | SPECC1   | chr17 | 20149238  | 20163607  | 1 | 27.51266 | N/A | N/A | N/A |
| NM_172070.10.2    | UBR3     | chr2  | 170728745 | 170762674 | 1 | 27.51266 | N/A | N/A | N/A |
| NM_001080.5.2     | ALDH5A1  | chr6  | 24502750  | 24515538  | 1 | 27.51266 | N/A | N/A | N/A |
| NM_001159644.9.5  | MCTP2    | chr15 | 94927250  | 94945248  | 1 | 27.51266 | N/A | N/A | N/A |
| NM_016589.5.2     | TIMMDC1  | chr3  | 119219541 | 119232566 | 1 | 27.51266 | N/A | N/A | N/A |
| NM_001280.6.2     | CIRBP    | chr19 | 1270926   | 1272050   | 1 | 27.51266 | N/A | N/A | N/A |
| NM_015140.9.6     | TTL12    | chr22 | 43569720  | 43572402  | 1 | 27.51266 | N/A | N/A | N/A |
| NM_007051.6.5     | FAF1     | chr1  | 51204534  | 51210447  | 1 | 27.51266 | N/A | N/A | N/A |
| NM_001137550.8.4  | LRRFIP1  | chr2  | 238626404 | 238636578 | 1 | 27.51266 | N/A | N/A | N/A |
| NM_015358.6.2     | MORC3    | chr21 | 37705943  | 37713844  | 1 | 27.51266 | N/A | N/A | N/A |
| NM_001923.10.8    | DDB1     | chr11 | 61089066  | 61090566  | 1 | 27.51266 | N/A | N/A | N/A |
| NR_037659.10.7    | -        | chr12 | 89853414  | 89861462  | 1 | 27.51266 | N/A | N/A | N/A |
| NM_003922.40.39   | HERC1    | chr15 | 63961736  | 63964893  | 1 | 27.51266 | N/A | N/A | N/A |
| NM_003756.5.3     | EIF3H    | chr8  | 117668094 | 117671219 | 1 | 27.51266 | N/A | N/A | N/A |
| NM_022918.13.9    | TMEM135  | chr11 | 87016977  | 87029277  | 1 | 27.51266 | N/A | N/A | N/A |
| NR_027655.4.2     | -        | chr21 | 30693541  | 30702014  | 1 | 27.51266 | N/A | N/A | N/A |
| NM_178314.4.3     | RILPL1   | chr12 | 123983090 | 123984083 | 1 | 27.51266 | N/A | N/A | N/A |
| NM_020935.7.3     | USP37    | chr2  | 219411641 | 219425606 | 1 | 27.51266 | N/A | N/A | N/A |

|                         |               |              |                 |                 |          |                 |          |               |                |
|-------------------------|---------------|--------------|-----------------|-----------------|----------|-----------------|----------|---------------|----------------|
| NM_001282728.6.4        | PXYLP1        | chr3         | 140997183       | 141006295       | 1        | 27.51266        | N/A      | N/A           | N/A            |
| NM_003908.7.4           | EIF2S2        | chr20        | 32681480        | 32686439        | 1        | 27.51266        | N/A      | N/A           | N/A            |
| NM_014283.6.2           | SUCO          | chr1         | 172520651       | 172526934       | 1        | 27.51266        | N/A      | N/A           | N/A            |
| NM_001410.5.4           | MEGF8         | chr19        | 42839186        | 42839537        | 1        | 27.51266        | N/A      | N/A           | N/A            |
| NM_001282663.3.3        | MICAL2        | chr11        | 12183625        | 12183966        | 1        | 27.51266        | N/A      | N/A           | N/A            |
| NM_001080539.15.14      | CCDC150       | chr2         | 197559769       | 197565904       | 1        | 27.51266        | N/A      | N/A           | N/A            |
| NM_000208.9.3           | INSR          | chr19        | 7163042         | 7184648         | 1        | 27.51266        | N/A      | N/A           | N/A            |
| NM_016316.5.2           | REV1          | chr2         | 100058778       | 100081447       | 1        | 27.51266        | N/A      | N/A           | N/A            |
| NM_003478.16.14         | CUL5          | chr11        | 107965117       | 107966418       | 1        | 27.51266        | N/A      | N/A           | N/A            |
| NM_001284305.10.9       | TBC1D22A      | chr22        | 47370185        | 47393605        | 1        | 27.51266        | N/A      | N/A           | N/A            |
| NM_001135771.2.2        | RPN2          | chr20        | 35812582        | 35812776        | 1        | 27.51266        | N/A      | N/A           | N/A            |
| NM_005923.7.4           | MAP3K5        | chr6         | 137015277       | 137019820       | 1        | 27.51266        | N/A      | N/A           | N/A            |
| NM_001278792.6.4        | RFC2          | chr7         | 73654267        | 73661093        | 1        | 27.51266        | N/A      | N/A           | N/A            |
| NM_001115113.8.4        | WDR26         | chr1         | 224592131       | 224612356       | 1        | 27.51266        | N/A      | N/A           | N/A            |
| NM_001282224.9.7        | ATP7A         | chrX         | 77264598        | 77267171        | 1        | 27.51266        | N/A      | N/A           | N/A            |
| <b>NM_144604.8.7</b>    |               |              |                 |                 |          |                 |          |               |                |
| <b>NM_144604.8.7</b>    | <b>ZC3H18</b> | <b>chr16</b> | <b>88675341</b> | <b>88677944</b> | <b>5</b> | <b>137.5633</b> | <b>1</b> | <b>20.925</b> | <b>-2.7168</b> |
| <b>NM_001282238.2.2</b> |               |              |                 |                 |          |                 |          |               |                |
| <b>NM_001282238.2.2</b> | <b>BCL11B</b> | <b>chr14</b> | <b>99723807</b> | <b>99724173</b> | <b>5</b> | <b>137.5633</b> | <b>1</b> | <b>20.925</b> | <b>-2.7168</b> |
| NM_001287816.6.5        | UBAP2L        | chr1         | 154207066       | 154207767       | 5        | 137.5633        | 1        | 20.925        | -2.7168        |
| NM_015431.5.2           | TRIM58        | chr1         | 248023918       | 248031365       | 5        | 137.5633        | 1        | 20.925        | -2.7168        |
| NM_144643.9.6           | SCLT1         | chr4         | 129913321       | 129925031       | 5        | 137.5633        | 1        | 20.925        | -2.7168        |
| NM_017458.5.4           | MVP           | chr16        | 29845053        | 29845387        | 9        | 247.614         | 2        | 41.85         | -2.5648        |
| NR_024448.3.2           | -             | chr22        | 24056373        | 24057381        | 4        | 110.0507        | 1        | 20.925        | -2.3949        |
| NM_006527.7.3           | SLBP          | chr4         | 1696500         | 1705427         | 4        | 110.0507        | 1        | 20.925        | -2.3949        |
| NM_020901.4.2           | PHRF1         | chr11        | 581491          | 587464          | 4        | 110.0507        | 1        | 20.925        | -2.3949        |
| NM_015015.9.6           | KDM4B         | chr19        | 5047486         | 5082515         | 4        | 110.0507        | 1        | 20.925        | -2.3949        |
| NM_138392.12.11         | SHKBP1        | chr19        | 41089303        | 41089623        | 15       | 412.6899        | 4        | 83.7          | -2.3018        |
| NM_001243403.12.10      | CLEC16A       | chr16        | 11096930        | 11118778        | 3        | 82.53799        | 1        | 20.925        | -1.9798        |
| NM_201277.4.3           | CNN2          | chr19        | 1032390         | 1032695         | 3        | 82.53799        | 1        | 20.925        | -1.9798        |
| NM_030767.14.12         | AKNA          | chr9         | 117118204       | 117120447       | 3        | 82.53799        | 1        | 20.925        | -1.9798        |
| NM_001042734.5.4        | SEC24B        | chr4         | 110412482       | 110416012       | 6        | 165.076         | 2        | 41.85         | -1.9798        |
| NM_032341.8.3           | DDI2          | chr1         | 15956819        | 15978390        | 3        | 82.53799        | 1        | 20.925        | -1.9798        |
| NM_139015.6.4           | SPPL3         | chr12        | 121220457       | 121222396       | 3        | 82.53799        | 1        | 20.925        | -1.9798        |

|                    |                |       |           |           |    |          |    |        |         |
|--------------------|----------------|-------|-----------|-----------|----|----------|----|--------|---------|
| NM_003298.12.11    | NR2C2          | chr3  | 15073885  | 15076316  | 3  | 82.53799 | 1  | 20.925 | -1.9798 |
| NM_001244713.5.2   | RAD23B         | chr9  | 110062421 | 110074018 | 3  | 82.53799 | 1  | 20.925 | -1.9798 |
| NM_018449.8.7      | UBAP2          | chr9  | 33971648  | 33973235  | 3  | 82.53799 | 1  | 20.925 | -1.9798 |
| NR_024497.7.6      | -              | chr10 | 38734344  | 38736649  | 3  | 82.53799 | 1  | 20.925 | -1.9798 |
| NM_015097.6.2      | CLASP2         | chr3  | 33725850  | 33738425  | 3  | 82.53799 | 1  | 20.925 | -1.9798 |
| NM_015161.3.2      | ARL6IP1        | chr16 | 18809246  | 18810156  | 8  | 220.1013 | 3  | 62.775 | -1.8099 |
| NM_003922.25.22    | HERC1          | chr15 | 63998978  | 64008672  | 2  | 55.02533 | 1  | 20.925 | -1.3949 |
| NM_012327.29.22    | PIGN           | chr18 | 59739905  | 59763183  | 2  | 55.02533 | 1  | 20.925 | -1.3949 |
| NM_001278438.13.9  | FNDC3A         | chr13 | 49741379  | 49749677  | 2  | 55.02533 | 1  | 20.925 | -1.3949 |
| NM_001876.9.7      | CPT1A          | chr11 | 68560782  | 68564401  | 2  | 55.02533 | 1  | 20.925 | -1.3949 |
| NM_022458.4.2      | LMBR1          | chr7  | 156619298 | 156629579 | 2  | 55.02533 | 1  | 20.925 | -1.3949 |
| NM_001202543.21.21 | CUX1           | chr7  | 101870646 | 101870949 | 4  | 110.0507 | 2  | 41.85  | -1.3949 |
| NM_000265.5.3      | NCF1           | chr7  | 74193427  | 74195181  | 2  | 55.02533 | 1  | 20.925 | -1.3949 |
| NM_007111.4.3      | TFDP1          | chr13 | 114265310 | 114277601 | 8  | 220.1013 | 4  | 83.7   | -1.3949 |
| NM_001109662.52.45 | HECTD4         | chr12 | 112645677 | 112657293 | 2  | 55.02533 | 1  | 20.925 | -1.3949 |
| NM_002027.3.2      | FNTA           | chr8  | 42914234  | 42919358  | 2  | 55.02533 | 1  | 20.925 | -1.3949 |
| NR_001591.6.5      | -              | chr22 | 17117929  | 17119630  | 2  | 55.02533 | 1  | 20.925 | -1.3949 |
| NM_001164315.22.16 | ANKRD36        | chr2  | 97823843  | 97833504  | 2  | 55.02533 | 1  | 20.925 | -1.3949 |
| NR_037615.4.2      | -              | chr12 | 70671911  | 70704797  | 2  | 55.02533 | 1  | 20.925 | -1.3949 |
| NM_019034.4.3      | RHOF           | chr12 | 122218777 | 122219098 | 4  | 110.0507 | 2  | 41.85  | -1.3949 |
| NM_001080398.33.30 | KIAA0368       | chr9  | 114148656 | 114154104 | 4  | 110.0507 | 2  | 41.85  | -1.3949 |
| NM_015016.26.26    | MAST3          | chr19 | 18258252  | 18258434  | 2  | 55.02533 | 1  | 20.925 | -1.3949 |
| NM_000578.8.4      | SLC11A1        | chr2  | 219249869 | 219252678 | 2  | 55.02533 | 1  | 20.925 | -1.3949 |
| NM_199203.5.3      | TMEM189-UBE2V1 | chr20 | 48744511  | 48747484  | 2  | 55.02533 | 1  | 20.925 | -1.3949 |
| NM_025219.4.2      | DNAJC5         | chr20 | 62559687  | 62562375  | 6  | 165.076  | 3  | 62.775 | -1.3949 |
| NM_020478.4.3      | ANK1           | chr8  | 41518947  | 41519459  | 5  | 137.5633 | 3  | 62.775 | -1.1318 |
| NM_006306.15.14    | SMC1A          | chrX  | 53430497  | 53430825  | 5  | 137.5633 | 3  | 62.775 | -1.1318 |
| NM_024947.6.5      | PHC3           | chr3  | 169863210 | 169867032 | 19 | 522.7406 | 12 | 251.1  | -1.0578 |
| NM_002945.4.2      | RPA1           | chr17 | 1746096   | 1747980   | 3  | 82.53799 | 2  | 41.85  | -0.9798 |
| NM_001247996.5.4   | ASAP1          | chr8  | 131249167 | 131370389 | 3  | 82.53799 | 2  | 41.85  | -0.9798 |
| NM_174937.3.2      | TCERG1L        | chr10 | 133106473 | 133107562 | 3  | 82.53799 | 2  | 41.85  | -0.9798 |
| NM_031417.10.9     | MARK4          | chr19 | 45781180  | 45781873  | 3  | 82.53799 | 2  | 41.85  | -0.9798 |
| NM_007345.9.2      | ZNF236         | chr18 | 74561481  | 74593468  | 3  | 82.53799 | 2  | 41.85  | -0.9798 |

|                    |         |       |           |           |     |          |     |        |         |
|--------------------|---------|-------|-----------|-----------|-----|----------|-----|--------|---------|
| NM_014681.6.6      | DHX34   | chr19 | 47865732  | 47865950  | 3   | 82.53799 | 2   | 41.85  | -0.9798 |
| NM_021639.8.7      | GPBP1L1 | chr1  | 46105881  | 46108171  | 7   | 192.5886 | 5   | 104.62 | -0.8803 |
| NM_001280.6.4      | CIRBP   | chr19 | 1271327   | 1272050   | 7   | 192.5886 | 5   | 104.62 | -0.8803 |
| NM_001417.8.7      | EIF4B   | chr12 | 53421565  | 53421972  | 4   | 110.0507 | 3   | 62.775 | -0.8099 |
| NM_012181.6.5      | FKBP8   | chr19 | 18648410  | 18649246  | 33  | 907.9179 | 25  | 523.12 | -0.7954 |
| NM_024757.25.19    | EHMT1   | chr9  | 140705912 | 140712590 | 5   | 137.5633 | 4   | 83.7   | -0.7168 |
| NM_018482.13.8     | ASAP1   | chr8  | 131164981 | 131193126 | 17  | 467.7153 | 15  | 313.87 | -0.5754 |
| NM_014615.2.2      | GSE1    | chr16 | 85667519  | 85667738  | 143 | 3934.311 | 134 | 2803.9 | -0.4887 |
| NM_198925.7.2      | SEMA4B  | chr15 | 90760670  | 90764997  | 6   | 165.076  | 6   | 125.55 | -0.3949 |
| NM_001012614.5.2   | CTBP1   | chr4  | 1219147   | 1235307   | 3   | 82.53799 | 3   | 62.775 | -0.3949 |
| NM_001134937.12.10 | FIP1L1  | chr4  | 54280781  | 54294350  | 3   | 82.53799 | 3   | 62.775 | -0.3949 |
| NM_018463.9.5      | ITFG2   | chr12 | 2929251   | 2930958   | 3   | 82.53799 | 3   | 62.775 | -0.3949 |
| NM_012203.4.2      | GRHPR   | chr9  | 37424841  | 37426651  | 5   | 137.5633 | 5   | 104.62 | -0.3949 |
| NM_015622.14.13    | CCZ1    | chr7  | 5963017   | 5963593   | 1   | 27.51266 | 1   | 20.925 | -0.3949 |
| NM_004964.6.5      | HDAC1   | chr1  | 32792539  | 32793278  | 1   | 27.51266 | 1   | 20.925 | -0.3949 |
| NM_018449.13.13    | UBAP2   | chr9  | 33948371  | 33948585  | 2   | 55.02533 | 2   | 41.85  | -0.3949 |
| NM_001145819.9.5   | SOX6    | chr11 | 16117541  | 16208501  | 1   | 27.51266 | 1   | 20.925 | -0.3949 |
| NM_174902.5.5      | LDLRAD3 | chr11 | 36248634  | 36248980  | 1   | 27.51266 | 1   | 20.925 | -0.3949 |
| NM_001080475.3.3   | PLEKHM3 | chr2  | 208841374 | 208842310 | 1   | 27.51266 | 1   | 20.925 | -0.3949 |
| NM_053043.7.2      | RBM33   | chr7  | 155457868 | 155499762 | 1   | 27.51266 | 1   | 20.925 | -0.3949 |
| NM_001247996.6.4   | ASAP1   | chr8  | 131226801 | 131370389 | 7   | 192.5886 | 7   | 146.47 | -0.3949 |
| NM_006750.5.5      | SNTB2   | chr16 | 69317950  | 69318147  | 1   | 27.51266 | 1   | 20.925 | -0.3949 |
| NM_016026.6.5      | RDH11   | chr14 | 68151731  | 68157138  | 1   | 27.51266 | 1   | 20.925 | -0.3949 |
| NM_012387.8.7      | PADI4   | chr1  | 17668437  | 17668897  | 1   | 27.51266 | 1   | 20.925 | -0.3949 |
| NM_005124.5.3      | NUP153  | chr6  | 17675135  | 17676001  | 1   | 27.51266 | 1   | 20.925 | -0.3949 |
| NM_001008738.12.7  | FNIP1   | chr5  | 131013395 | 131044965 | 1   | 27.51266 | 1   | 20.925 | -0.3949 |
| NM_001039670.7.6   | IFFO1   | chr12 | 6657590   | 6657991   | 1   | 27.51266 | 1   | 20.925 | -0.3949 |
| NM_004339.5.3      | PTTG1IP | chr21 | 46275124  | 46281186  | 2   | 55.02533 | 2   | 41.85  | -0.3949 |
| NM_001282752.6.2   | PUM2    | chr2  | 20507738  | 20527139  | 1   | 27.51266 | 1   | 20.925 | -0.3949 |
| NM_001130825.3.3   | SUPT5H  | chr19 | 39943995  | 39944161  | 1   | 27.51266 | 1   | 20.925 | -0.3949 |
| NM_032773.17.16    | LRCH3   | chr3  | 197592293 | 197593090 | 1   | 27.51266 | 1   | 20.925 | -0.3949 |
| NM_006996.2.2      | SLC19A2 | chr1  | 169446392 | 169446995 | 1   | 27.51266 | 1   | 20.925 | -0.3949 |
| NM_173834.6.2      | YIPF6   | chrX  | 67731690  | 67742759  | 2   | 55.02533 | 2   | 41.85  | -0.3949 |



|                    |         |       |           |           |    |          |    |        |         |
|--------------------|---------|-------|-----------|-----------|----|----------|----|--------|---------|
| NM_017698.3.2      | TMEM164 | chrX  | 109310574 | 109352374 | 1  | 27.51266 | 1  | 20.925 | -0.3949 |
| NM_198097.14.13    | CCZ1B   | chr7  | 6840578   | 6841154   | 1  | 27.51266 | 1  | 20.925 | -0.3949 |
| NR_002824.4.4      | -       | chr15 | 23338852  | 23339028  | 1  | 27.51266 | 1  | 20.925 | -0.3949 |
| NM_001128148.18.14 | TFRC    | chr3  | 195780288 | 195787118 | 1  | 27.51266 | 1  | 20.925 | -0.3949 |
| NM_004741.5.2      | NOLC1   | chr10 | 103916775 | 103917971 | 1  | 27.51266 | 1  | 20.925 | -0.3949 |
| NM_001257386.10.8  | ABCG2   | chr4  | 89028335  | 89036210  | 1  | 27.51266 | 1  | 20.925 | -0.3949 |
| NM_001083536.3.2   | FGD3    | chr9  | 95737519  | 95738991  | 2  | 55.02533 | 2  | 41.85  | -0.3949 |
| NM_001163636.22.19 | GTF2I   | chr7  | 74157787  | 74160750  | 1  | 27.51266 | 1  | 20.925 | -0.3949 |
| NM_015148.3.3      | PASK    | chr2  | 242079935 | 242080168 | 1  | 27.51266 | 1  | 20.925 | -0.3949 |
| NM_003922.2.2      | HERC1   | chr15 | 64066892  | 64067848  | 1  | 27.51266 | 1  | 20.925 | -0.3949 |
| NM_024821.4.2      | CCDC134 | chr22 | 42204878  | 42206295  | 2  | 55.02533 | 2  | 41.85  | -0.3949 |
| NM_007202.4.4      | AKAP10  | chr17 | 19861326  | 19861884  | 1  | 27.51266 | 1  | 20.925 | -0.3949 |
| NM_000051.37.35    | ATM     | chr11 | 108172374 | 108175579 | 1  | 27.51266 | 1  | 20.925 | -0.3949 |
| NM_001282560.5.4   | EYA3    | chr1  | 28365349  | 28369161  | 1  | 27.51266 | 1  | 20.925 | -0.3949 |
| NM_012179.2.2      | FBXO7   | chr22 | 32874967  | 32875262  | 2  | 55.02533 | 2  | 41.85  | -0.3949 |
| NM_001191022.8.7   | CTCF    | chr16 | 67662272  | 67663436  | 1  | 27.51266 | 1  | 20.925 | -0.3949 |
| NM_004753.4.3      | DHRS3   | chr1  | 12638745  | 12639440  | 1  | 27.51266 | 1  | 20.925 | -0.3949 |
| NM_053043.9.7      | RBM33   | chr7  | 155499553 | 155511137 | 1  | 27.51266 | 1  | 20.925 | -0.3949 |
| NM_145912.2.2      | NFAM1   | chr22 | 42807412  | 42807742  | 1  | 27.51266 | 1  | 20.925 | -0.3949 |
| NM_001109662.3.2   | HECTD4  | chr12 | 112752260 | 112757546 | 1  | 27.51266 | 1  | 20.925 | -0.3949 |
| NM_138799.4.2      | MBOAT2  | chr2  | 9048750   | 9098771   | 10 | 275.1266 | 11 | 230.17 | -0.2574 |
| NM_007166.19.14    | PICALM  | chr11 | 85685750  | 85695016  | 5  | 137.5633 | 6  | 125.55 | -0.1318 |
| NM_001145808.14.13 | ITGAM   | chr16 | 31308834  | 31309275  | 15 | 412.6899 | 19 | 397.57 | -0.0538 |
| NM_000265.7.6      | NCF1    | chr7  | 74197281  | 74197975  | 3  | 82.53799 | 4  | 83.7   | 0.0202  |
| NM_006662.27.26    | SRCAP   | chr16 | 30740286  | 30740893  | 3  | 82.53799 | 4  | 83.7   | 0.0202  |
| NM_001286646.1.1   | SLC45A4 | chr8  | 142264087 | 142264728 | 3  | 82.53799 | 4  | 83.7   | 0.0202  |
| NM_004380.2.2      | CREBBP  | chr16 | 3900297   | 3901010   | 6  | 165.076  | 8  | 167.4  | 0.0202  |
| NM_016464.4.3      | TMEM138 | chr11 | 61133516  | 61135470  | 10 | 275.1266 | 14 | 292.95 | 0.0906  |
| NM_014313.6.4      | TMEM50A | chr1  | 25678116  | 25683344  | 2  | 55.02533 | 3  | 62.775 | 0.1901  |
| NM_138957.3.2      | MAPK1   | chr22 | 22160138  | 22162135  | 2  | 55.02533 | 3  | 62.775 | 0.1901  |
| NM_001282529.9.8   | UBAP2   | chr9  | 33948371  | 33953472  | 2  | 55.02533 | 3  | 62.775 | 0.1901  |
| NM_015603.7.6      | CCDC9   | chr19 | 47767859  | 47768203  | 2  | 55.02533 | 3  | 62.775 | 0.1901  |
| NM_017590.13.12    | ZC3H7B  | chr22 | 41738532  | 41739580  | 2  | 55.02533 | 3  | 62.775 | 0.1901  |

|                    |         |       |           |           |   |          |    |        |        |
|--------------------|---------|-------|-----------|-----------|---|----------|----|--------|--------|
| NM_002372.3.2      | MAN2A1  | chr5  | 109049220 | 109051965 | 2 | 55.02533 | 3  | 62.775 | 0.1901 |
| NM_031490.14.13    | LONP2   | chr16 | 48381417  | 48382201  | 2 | 55.02533 | 3  | 62.775 | 0.1901 |
| NM_138799.3.2      | MBOAT2  | chr2  | 9083315   | 9098771   | 8 | 220.1013 | 12 | 251.1  | 0.1901 |
| NM_138576.2.2      | BCL11B  | chr14 | 99723807  | 99724176  | 5 | 137.5633 | 8  | 167.4  | 0.2832 |
| NR_003186.4.4      | -       | chr7  | 72643600  | 72644294  | 3 | 82.53799 | 6  | 125.55 | 0.6051 |
| NM_018107.3.2      | RBM23   | chr14 | 23378691  | 23380612  | 3 | 82.53799 | 6  | 125.55 | 0.6051 |
| NM_005898.12.8     | CAPRIN1 | chr11 | 34104371  | 34111003  | 1 | 27.51266 | 2  | 41.85  | 0.6051 |
| NM_020193.14.10    | EMSY    | chr11 | 76224429  | 76239510  | 1 | 27.51266 | 2  | 41.85  | 0.6051 |
| NM_003434.6.2      | ZNF133  | chr20 | 18278628  | 18287037  | 1 | 27.51266 | 2  | 41.85  | 0.6051 |
| NM_015622.8.5      | CCZ1    | chr7  | 5941287   | 5949747   | 1 | 27.51266 | 2  | 41.85  | 0.6051 |
| NM_007198.4.2      | PROSC   | chr8  | 37623043  | 37623873  | 2 | 55.02533 | 4  | 83.7   | 0.6051 |
| NM_001040153.5.2   | SLAIN1  | chr13 | 78293666  | 78327493  | 1 | 27.51266 | 2  | 41.85  | 0.6051 |
| NM_001145819.9.8   | SOX6    | chr11 | 16117541  | 16119234  | 2 | 55.02533 | 4  | 83.7   | 0.6051 |
| NM_015164.7.4      | PLEKHM2 | chr1  | 16044387  | 16047883  | 1 | 27.51266 | 2  | 41.85  | 0.6051 |
| NM_001136053.3.2   | TPRA1   | chr3  | 127298582 | 127299006 | 1 | 27.51266 | 2  | 41.85  | 0.6051 |
| NM_016955.9.2      | SEPSECS | chr4  | 25128885  | 25160729  | 1 | 27.51266 | 2  | 41.85  | 0.6051 |
| NM_015092.41.39    | SMG1    | chr16 | 18852886  | 18856973  | 1 | 27.51266 | 2  | 41.85  | 0.6051 |
| NM_004514.4.2      | FOXK2   | chr17 | 80521229  | 80529746  | 1 | 27.51266 | 2  | 41.85  | 0.6051 |
| NM_001008566.3.3   | TPST2   | chr22 | 26936754  | 26937684  | 1 | 27.51266 | 2  | 41.85  | 0.6051 |
| NM_130807.3.3      | MOB3A   | chr19 | 2078138   | 2078678   | 1 | 27.51266 | 2  | 41.85  | 0.6051 |
| NM_020677.4.3      | NMRAL1  | chr16 | 4516153   | 4519466   | 1 | 27.51266 | 2  | 41.85  | 0.6051 |
| NM_001282861.15.14 | GON4L   | chr1  | 155747412 | 155753880 | 1 | 27.51266 | 2  | 41.85  | 0.6051 |
| NM_212535.5.4      | PRKCB   | chr16 | 24043456  | 24046868  | 1 | 27.51266 | 2  | 41.85  | 0.6051 |
| NM_001114380.15.14 | ITGAL   | chr16 | 30510394  | 30510810  | 1 | 27.51266 | 2  | 41.85  | 0.6051 |
| NM_053002.4.2      | MED12L  | chr3  | 150834124 | 150845771 | 1 | 27.51266 | 2  | 41.85  | 0.6051 |
| NM_001271.31.29    | CHD2    | chr15 | 93540186  | 93541851  | 1 | 27.51266 | 2  | 41.85  | 0.6051 |
| NM_005534.6.2      | IFNGR2  | chr21 | 34787194  | 34805178  | 1 | 27.51266 | 2  | 41.85  | 0.6051 |
| NM_001085400.6.4   | RELL1   | chr4  | 37633006  | 37640126  | 4 | 110.0507 | 8  | 167.4  | 0.6051 |
| NM_033326.9.7      | SOX6    | chr11 | 16117541  | 16133469  | 1 | 27.51266 | 2  | 41.85  | 0.6051 |
| NM_001097615.6.5   | POLR2J3 | chr7  | 102181539 | 102182109 | 1 | 27.51266 | 2  | 41.85  | 0.6051 |
| NM_018237.8.8      | CCAR1   | chr10 | 70507130  | 70507323  | 1 | 27.51266 | 2  | 41.85  | 0.6051 |
| NM_000110.8.6      | DPYD    | chr1  | 98144650  | 98165103  | 1 | 27.51266 | 2  | 41.85  | 0.6051 |
| NM_004461.7.5      | FARSA   | chr19 | 13039155  | 13039661  | 8 | 220.1013 | 17 | 355.72 | 0.6926 |

|                      |               |              |                 |                 |          |                 |          |               |               |
|----------------------|---------------|--------------|-----------------|-----------------|----------|-----------------|----------|---------------|---------------|
| NM_001167608.5.4     | RHBDD1        | chr2         | 227729319       | 227732034       | 4        | 110.0507        | 9        | 188.32        | 0.7751        |
| NM_014661.4.4        | FAM53B        | chr10        | 126370175       | 126370948       | 4        | 110.0507        | 9        | 188.32        | 0.7751        |
| NM_181838.6.3        | UBE2D2        | chr5         | 138979956       | 138994551       | 2        | 55.02533        | 5        | 104.62        | 0.9271        |
| NM_001105214.9.6     | ASH2L         | chr8         | 37971709        | 37976881        | 2        | 55.02533        | 5        | 104.62        | 0.9271        |
| NM_005908.5.2        | MANBA         | chr4         | 103635594       | 103647840       | 2        | 55.02533        | 5        | 104.62        | 0.9271        |
| NM_003120.4.2        | SPI1          | chr11        | 47380394        | 47397280        | 2        | 55.02533        | 5        | 104.62        | 0.9271        |
| NM_014059.4.3        | RGCC          | chr13        | 42040958        | 42042974        | 2        | 55.02533        | 5        | 104.62        | 0.9271        |
| NM_018449.13.11      | UBAP2         | chr9         | 33948371        | 33956144        | 3        | 82.53799        | 8        | 167.4         | 1.0202        |
| NM_152487.5.2        | TMEM56        | chr1         | 95609446        | 95616975        | 37       | 1017.969        | 101      | 2113.4        | 1.0539        |
| NM_001005404.2.2     | YPEL2         | chr17        | 57430575        | 57430887        | 1        | 27.51266        | 3        | 62.775        | 1.1901        |
| NM_001286249.6.2     | HAGH          | chr16        | 1866893         | 1873038         | 1        | 27.51266        | 3        | 62.775        | 1.1901        |
| NM_018449.12.11      | UBAP2         | chr9         | 33953282        | 33956144        | 1        | 27.51266        | 3        | 62.775        | 1.1901        |
| NM_152924.3.2        | ABHD2         | chr15        | 89656955        | 89659752        | 2        | 55.02533        | 6        | 125.55        | 1.1901        |
| NM_181701.5.2        | QSOX2         | chr9         | 139115608       | 139118720       | 1        | 27.51266        | 3        | 62.775        | 1.1901        |
| NM_012181.4.3        | FKBP8         | chr19        | 18650180        | 18650530        | 1        | 27.51266        | 3        | 62.775        | 1.1901        |
| NM_001159643.1.1     | MCTP2         | chr15        | 94841429        | 94841959        | 1        | 27.51266        | 3        | 62.775        | 1.1901        |
| NM_005848.11.6       | DENND4A       | chr15        | 66021409        | 66031213        | 2        | 55.02533        | 6        | 125.55        | 1.1901        |
| NR_026566.8.6        | -             | chr10        | 48941193        | 48943556        | 1        | 27.51266        | 3        | 62.775        | 1.1901        |
| NM_006836.31.29      | GCN1          | chr12        | 120592773       | 120593523       | 2        | 55.02533        | 6        | 125.55        | 1.1901        |
| NM_015447.3.2        | CAMSAP1       | chr9         | 138773478       | 138774924       | 3        | 82.53799        | 9        | 188.32        | 1.1901        |
| NM_022039.5.2        | FBXW4         | chr10        | 103427642       | 103436193       | 1        | 27.51266        | 3        | 62.775        | 1.1901        |
| NM_024947.7.5        | PHC3          | chr3         | 169854206       | 169867032       | 4        | 110.0507        | 14       | 292.95        | 1.4125        |
| NM_003439.3.2        | ZKSCAN1       | chr7         | 99621041        | 99621930        | 3        | 82.53799        | 11       | 230.17        | 1.4796        |
| NM_014899.7.6        | RHOBTB3       | chr5         | 95091099        | 95099324        | 1        | 27.51266        | 4        | 83.7          | 1.6051        |
| NM_080840.5.4        | PTPRA         | chr20        | 2944917         | 2945848         | 2        | 55.02533        | 8        | 167.4         | 1.6051        |
| NR_073062.3.2        | -             | chr10        | 74474868        | 74475660        | 1        | 27.51266        | 4        | 83.7          | 1.6051        |
| NM_006135.7.4        | CAPZA1        | chr1         | 113196219       | 113202401       | 1        | 27.51266        | 4        | 83.7          | 1.6051        |
| NM_005174.8.3        | ATP5C1        | chr10        | 7839009         | 7844817         | 1        | 27.51266        | 4        | 83.7          | 1.6051        |
| NM_012335.19.16      | MYO1F         | chr19        | 8601135         | 8604912         | 1        | 27.51266        | 5        | 104.62        | 1.9271        |
| NM_005028.4.2        | PIP4K2A       | chr10        | 22880557        | 22898646        | 1        | 27.51266        | 5        | 104.62        | 1.9271        |
| NM_013396.3.2        | USP25         | chr21        | 17135209        | 17138460        | 1        | 27.51266        | 5        | 104.62        | 1.9271        |
| <b>NM_001429.9.3</b> | <b>EP300</b>  | <b>chr22</b> | <b>41521867</b> | <b>41536261</b> | <b>1</b> | <b>27.51266</b> | <b>5</b> | <b>104.62</b> | <b>1.9271</b> |
| <b>NM_019852.3.2</b> | <b>METTL3</b> | <b>chr14</b> | <b>21971315</b> | <b>21972024</b> | <b>1</b> | <b>27.51266</b> | <b>6</b> | <b>125.55</b> | <b>2.1901</b> |

| <b>NM_020774.6.2</b> | <b>MIB1</b>  | <b>chr18</b> | <b>19345732</b> | <b>19359646</b> | <b>1</b> | <b>27.51266</b> | <b>9</b>  | <b>188.32</b> | <b>2.7751</b> |
|----------------------|--------------|--------------|-----------------|-----------------|----------|-----------------|-----------|---------------|---------------|
| <i>NM_004145.2.2</i> | <i>MYO9B</i> | <i>chr19</i> | <i>17212469</i> | <i>17213367</i> | <i>1</i> | <i>27.5127</i>  | <i>10</i> | <i>209.25</i> | <i>2.9271</i> |
| NM_001135610.6.2     | PRDM2        | chr1         | 14042035        | 14075982        | N/A      | N/A             | 1         | 20.925        | N/A           |
| NM_138492.5.2        | PRELID2      | chr5         | 145197456       | 145205763       | N/A      | N/A             | 1         | 20.925        | N/A           |
| NM_001195071.3.2     | TMEM184B     | chr22        | 38641940        | 38644025        | N/A      | N/A             | 1         | 20.925        | N/A           |
| NM_203364.15.12      | CAPRIN1      | chr11        | 34110941        | 34113603        | N/A      | N/A             | 1         | 20.925        | N/A           |
| NR_102264.4.3        | -            | chr10        | 70227879        | 70229920        | N/A      | N/A             | 1         | 20.925        | N/A           |
| NM_001286723.3.2     | FAM120A      | chr9         | 96233422        | 96238620        | N/A      | N/A             | 1         | 20.925        | N/A           |
| NM_153638.6.2        | PANK2        | chr20        | 3888572         | 3899443         | N/A      | N/A             | 1         | 20.925        | N/A           |
| NM_020824.7.5        | ARHGAP21     | chr10        | 24918924        | 24924032        | N/A      | N/A             | 1         | 20.925        | N/A           |
| NM_001046.15.8       | SLC12A2      | chr5         | 127474288       | 127488497       | N/A      | N/A             | 1         | 20.925        | N/A           |
| NR_037918.3.2        | -            | chr12        | 11187380        | 11199787        | N/A      | N/A             | 1         | 20.925        | N/A           |
| NM_017994.3.2        | TMEM248      | chr7         | 66406834        | 66410248        | N/A      | N/A             | 1         | 20.925        | N/A           |
| NM_001130679.5.3     | EIF4E        | chr4         | 99808229        | 99812483        | N/A      | N/A             | 1         | 20.925        | N/A           |
| NM_145177.5.4        | DHRX         | chrY         | 2134780         | 2159644         | N/A      | N/A             | 1         | 20.925        | N/A           |
| NM_020133.2.2        | AGPAT4       | chr6         | 161653067       | 161653334       | N/A      | N/A             | 1         | 20.925        | N/A           |
| NM_014415.7.2        | ZBTB11       | chr3         | 101374947       | 101391057       | N/A      | N/A             | 1         | 20.925        | N/A           |
| NM_001005362.11.9    | DNM2         | chr19        | 10906047        | 10909248        | N/A      | N/A             | 1         | 20.925        | N/A           |
| NM_007357.9.4        | COG2         | chr1         | 230798886       | 230810870       | N/A      | N/A             | 1         | 20.925        | N/A           |
| NM_015226.21.19      | CLEC16A      | chr16        | 11214471        | 11220003        | N/A      | N/A             | 1         | 20.925        | N/A           |
| NM_015156.10.8       | RCOR1        | chr14        | 103180759       | 103187714       | N/A      | N/A             | 1         | 20.925        | N/A           |
| NM_012387.3.2        | PADI4        | chr1         | 17657463        | 17660504        | N/A      | N/A             | 1         | 20.925        | N/A           |
| NM_001195102.8.5     | GSR          | chr8         | 30546677        | 30560757        | N/A      | N/A             | 1         | 20.925        | N/A           |
| NM_001247996.8.4     | ASAP1        | chr8         | 131199481       | 131370389       | N/A      | N/A             | 1         | 20.925        | N/A           |
| NM_001163034.20.18   | RPTOR        | chr17        | 78896523        | 78899280        | N/A      | N/A             | 1         | 20.925        | N/A           |
| NM_013449.18.14      | BAZ2A        | chr12        | 56997142        | 56999111        | N/A      | N/A             | 1         | 20.925        | N/A           |
| NM_001085399.6.5     | RELL1        | chr4         | 37633006        | 37636745        | N/A      | N/A             | 1         | 20.925        | N/A           |
| NM_015555.5.4        | ZNF451       | chr6         | 56989531        | 56993638        | N/A      | N/A             | 1         | 20.925        | N/A           |
| NM_145759.3.2        | TRAF5        | chr1         | 211526580       | 211527809       | N/A      | N/A             | 1         | 20.925        | N/A           |
| NM_001199777.8.2     | POC1B        | chr12        | 89860546        | 89891119        | N/A      | N/A             | 1         | 20.925        | N/A           |
| NM_001281512.4.2     | HADHB        | chr2         | 26477114        | 26486347        | N/A      | N/A             | 1         | 20.925        | N/A           |
| NM_001134364.8.6     | MAP4         | chr3         | 47956306        | 47960331        | N/A      | N/A             | 1         | 20.925        | N/A           |

|                    |          |       |           |           |     |     |   |        |     |
|--------------------|----------|-------|-----------|-----------|-----|-----|---|--------|-----|
| NM_016426.9.7      | GTSE1    | chr22 | 46711928  | 46722551  | N/A | N/A | 1 | 20.925 | N/A |
| NM_001122731.15.1  | MICAL3   | chr22 | 18368643  | 18389652  | N/A | N/A | 1 | 20.925 | N/A |
| NM_024541.15.2     | C10orf76 | chr10 | 103761727 | 103799882 | N/A | N/A | 1 | 20.925 | N/A |
| NM_001126103.18.15 | RACGAP1  | chr12 | 50384466  | 50386438  | N/A | N/A | 1 | 20.925 | N/A |
| NM_001278945.5.3   | PBK      | chr8  | 27679835  | 27685715  | N/A | N/A | 1 | 20.925 | N/A |
| NM_002662.16.14    | PLD1     | chr3  | 171404474 | 171406666 | N/A | N/A | 1 | 20.925 | N/A |
| NM_001256045.3.2   | PIK3CB   | chr3  | 138413627 | 138417937 | N/A | N/A | 1 | 20.925 | N/A |
| NM_012257.6.2      | HBP1     | chr7  | 106820323 | 106827126 | N/A | N/A | 1 | 20.925 | N/A |
| NM_152641.20.16    | ARID2    | chr12 | 46254583  | 46287504  | N/A | N/A | 1 | 20.925 | N/A |
| NM_175624.3.2      | RAB3IP   | chr12 | 70149163  | 70150443  | N/A | N/A | 1 | 20.925 | N/A |
| NM_001109662.41.38 | HECTD4   | chr12 | 112667501 | 112670889 | N/A | N/A | 1 | 20.925 | N/A |
| NM_203447.14.12    | DOCK8    | chr9  | 336581    | 340321    | N/A | N/A | 1 | 20.925 | N/A |
| NM_031966.7.6      | CCNB1    | chr5  | 68470703  | 68471364  | N/A | N/A | 1 | 20.925 | N/A |
| NM_018309.10.4     | TBC1D23  | chr3  | 100002450 | 100018175 | N/A | N/A | 1 | 20.925 | N/A |
| NM_005921.6.2      | MAP3K1   | chr5  | 56152426  | 56161804  | N/A | N/A | 1 | 20.925 | N/A |
| NM_018426.22.20    | TMEM63B  | chr6  | 44120329  | 44121925  | N/A | N/A | 1 | 20.925 | N/A |
| NM_015313.36.31    | ARHGEF12 | chr11 | 120343758 | 120348235 | N/A | N/A | 1 | 20.925 | N/A |
| NM_001289396.27.25 | SMARCA2  | chr9  | 2115821   | 2123937   | N/A | N/A | 1 | 20.925 | N/A |
| NM_000032.10.7     | ALAS2    | chrX  | 55039918  | 55044098  | N/A | N/A | 1 | 20.925 | N/A |
| NM_001191028.8.5   | TNPO3    | chr7  | 128637442 | 128645213 | N/A | N/A | 1 | 20.925 | N/A |
| NM_003101.9.5      | SOAT1    | chr1  | 179306971 | 179312078 | N/A | N/A | 1 | 20.925 | N/A |
| NM_002631.5.4      | PGD      | chr1  | 10463127  | 10464336  | N/A | N/A | 1 | 20.925 | N/A |
| NM_005720.7.5      | ARPC1B   | chr7  | 98987527  | 98988876  | N/A | N/A | 1 | 20.925 | N/A |
| NM_005720.7.6      | ARPC1B   | chr7  | 98988515  | 98988876  | N/A | N/A | 1 | 20.925 | N/A |
| NM_001278387.4.2   | SLC38A1  | chr12 | 46633461  | 46648719  | N/A | N/A | 1 | 20.925 | N/A |
| NM_181335.7.3      | ARHGAP8  | chr22 | 45197956  | 45221473  | N/A | N/A | 1 | 20.925 | N/A |
| NM_014889.10.8     | PITRM1   | chr10 | 3201105   | 3202522   | N/A | N/A | 1 | 20.925 | N/A |
| NM_152420.3.2      | CARNMT1  | chr9  | 77631183  | 77632364  | N/A | N/A | 1 | 20.925 | N/A |
| NM_023034.2.2      | WHSC1L1  | chr8  | 38205014  | 38205733  | N/A | N/A | 1 | 20.925 | N/A |
| NM_005338.9.6      | HIP1     | chr7  | 75197502  | 75211467  | N/A | N/A | 1 | 20.925 | N/A |
| NM_005601.2.2      | NKG7     | chr19 | 51875414  | 51875561  | N/A | N/A | 1 | 20.925 | N/A |
| NM_016287.8.2      | HP1BP3   | chr1  | 21091869  | 21107033  | N/A | N/A | 1 | 20.925 | N/A |
| NM_015938.9.6      | NMD3     | chr3  | 160952514 | 160956614 | N/A | N/A | 1 | 20.925 | N/A |

|                    |          |       |           |           |     |     |   |        |     |
|--------------------|----------|-------|-----------|-----------|-----|-----|---|--------|-----|
| NM_001257158.9.4   | CEP41    | chr7  | 130040547 | 130052081 | N/A | N/A | 1 | 20.925 | N/A |
| NM_001270940.15.13 | XPO6     | chr16 | 28132990  | 28143724  | N/A | N/A | 1 | 20.925 | N/A |
| NM_002880.7.6      | RAF1     | chr3  | 12645634  | 12647798  | N/A | N/A | 1 | 20.925 | N/A |
| NM_005848.7.2      | DENND4A  | chr15 | 66030044  | 66053776  | N/A | N/A | 1 | 20.925 | N/A |
| NM_021813.5.2      | BACH2    | chr6  | 90798679  | 90981660  | N/A | N/A | 1 | 20.925 | N/A |
| NM_000263.5.3      | NAGLU    | chr17 | 40690356  | 40693224  | N/A | N/A | 1 | 20.925 | N/A |
| NM_016284.17.17    | CNOT1    | chr16 | 58594115  | 58594266  | N/A | N/A | 1 | 20.925 | N/A |
| NM_001135187.5.2   | AGFG1    | chr2  | 228356262 | 228389631 | N/A | N/A | 1 | 20.925 | N/A |
| NM_015024.8.3      | XPO7     | chr8  | 21826993  | 21835354  | N/A | N/A | 1 | 20.925 | N/A |
| NM_021627.10.3     | SENP2    | chr3  | 185316199 | 185331196 | N/A | N/A | 1 | 20.925 | N/A |
| NM_001271287.6.3   | ZNF512   | chr2  | 27822449  | 27824309  | N/A | N/A | 1 | 20.925 | N/A |
| NM_001278531.9.3   | ERMARD   | chr6  | 170155378 | 170162627 | N/A | N/A | 1 | 20.925 | N/A |
| NM_005848.7.6      | DENND4A  | chr15 | 66030044  | 66031213  | N/A | N/A | 1 | 20.925 | N/A |
| NM_018263.8.5      | ASXL2    | chr2  | 25982350  | 25994409  | N/A | N/A | 1 | 20.925 | N/A |
| NM_014708.30.21    | KNTC1    | chr12 | 123052807 | 123061576 | N/A | N/A | 1 | 20.925 | N/A |
| NM_014661.2.2      | FAM53B   | chr10 | 126395204 | 126395456 | N/A | N/A | 1 | 20.925 | N/A |
| NM_014109.24.21    | ATAD2    | chr8  | 124346117 | 124350061 | N/A | N/A | 1 | 20.925 | N/A |
| NM_001243403.17.11 | CLEC16A  | chr16 | 11114049  | 11145498  | N/A | N/A | 1 | 20.925 | N/A |
| NR_024054.4.2      | -        | chr5  | 69493081  | 69517842  | N/A | N/A | 1 | 20.925 | N/A |
| NM_153051.9.2      | MTMR3    | chr22 | 30353024  | 30398982  | N/A | N/A | 1 | 20.925 | N/A |
| NM_014109.24.20    | ATAD2    | chr8  | 124346117 | 124351686 | N/A | N/A | 1 | 20.925 | N/A |
| NM_018993.4.3      | RIN2     | chr20 | 19937258  | 19941455  | N/A | N/A | 1 | 20.925 | N/A |
| NM_024294.3.2      | C6orf106 | chr6  | 34614377  | 34622556  | N/A | N/A | 1 | 20.925 | N/A |
| NM_001278194.3.2   | GANAB    | chr11 | 62406454  | 62407203  | N/A | N/A | 1 | 20.925 | N/A |
| NM_004252.3.2      | SLC9A3R1 | chr17 | 72758150  | 72759659  | N/A | N/A | 1 | 20.925 | N/A |
| NM_181783.12.5     | TMTCC3   | chr12 | 88553890  | 88584399  | N/A | N/A | 1 | 20.925 | N/A |
| NM_003234.16.7     | TFRC     | chr3  | 195785154 | 195796439 | N/A | N/A | 1 | 20.925 | N/A |
| NM_032310.3.2      | CARD19   | chr9  | 95869955  | 95873003  | N/A | N/A | 1 | 20.925 | N/A |
| NM_001287822.6.4   | ZWILCH   | chr15 | 66811216  | 66813543  | N/A | N/A | 1 | 20.925 | N/A |
| NM_015155.3.2      | LARP4B   | chr10 | 930386    | 931700    | N/A | N/A | 1 | 20.925 | N/A |
| NM_001253912.17.15 | TBC1D1   | chr4  | 38091552  | 38104778  | N/A | N/A | 1 | 20.925 | N/A |
| NM_152419.16.11    | HGSNAT   | chr8  | 43037287  | 43052885  | N/A | N/A | 1 | 20.925 | N/A |
| NM_014997.5.4      | KLHDC10  | chr7  | 129760588 | 129762042 | N/A | N/A | 1 | 20.925 | N/A |

|                    |          |       |           |           |     |     |   |        |     |
|--------------------|----------|-------|-----------|-----------|-----|-----|---|--------|-----|
| NM_014698.17.16    | TMEM63A  | chr1  | 226044352 | 226044717 | N/A | N/A | 1 | 20.925 | N/A |
| NM_004798.5.3      | KIF3B    | chr20 | 30904020  | 30904677  | N/A | N/A | 1 | 20.925 | N/A |
| NM_001286157.11.8  | DYNC1LI2 | chr16 | 66759730  | 66763002  | N/A | N/A | 1 | 20.925 | N/A |
| NM_001285448.4.3   | PDXDC1   | chr16 | 15091609  | 15092262  | N/A | N/A | 1 | 20.925 | N/A |
| NM_001097613.11.9  | GPR89A   | chr1  | 145787771 | 145791170 | N/A | N/A | 1 | 20.925 | N/A |
| NM_033655.9.5      | CNTNAP3  | chr9  | 39165929  | 39178357  | N/A | N/A | 1 | 20.925 | N/A |
| NM_012213.4.2      | MLYCD    | chr16 | 83940591  | 83945972  | N/A | N/A | 1 | 20.925 | N/A |
| NM_003286.15.14    | TOP1     | chr20 | 39741421  | 39742795  | N/A | N/A | 1 | 20.925 | N/A |
| NM_018957.10.8     | SH3BP1   | chr22 | 38040643  | 38041517  | N/A | N/A | 1 | 20.925 | N/A |
| NM_175709.4.3      | CBX7     | chr22 | 39534640  | 39537441  | N/A | N/A | 1 | 20.925 | N/A |
| NM_012290.8.3      | TLK1     | chr2  | 171910270 | 171939362 | N/A | N/A | 1 | 20.925 | N/A |
| NM_006306.9.7      | SMC1A    | chrX  | 53435992  | 53438851  | N/A | N/A | 1 | 20.925 | N/A |
| NM_001256.8.2      | CDC27    | chr17 | 45232037  | 45259003  | N/A | N/A | 1 | 20.925 | N/A |
| NM_001005361.18.15 | DNM2     | chr19 | 10922939  | 10935897  | N/A | N/A | 1 | 20.925 | N/A |
| NM_001286715.22.17 | AGTPBP1  | chr9  | 88200377  | 88211364  | N/A | N/A | 1 | 20.925 | N/A |
| NM_004544.9.6      | NDUFA10  | chr2  | 240929490 | 240951113 | N/A | N/A | 1 | 20.925 | N/A |
| NM_014709.16.11    | USP34    | chr2  | 61570949  | 61577828  | N/A | N/A | 1 | 20.925 | N/A |
| NM_004360.10.3     | CDH1     | chr16 | 68835572  | 68849662  | N/A | N/A | 1 | 20.925 | N/A |
| NR_033814.9.4      | -        | chr14 | 75355797  | 75361112  | N/A | N/A | 1 | 20.925 | N/A |
| NM_013233.10.2     | STK39    | chr2  | 168986050 | 169038600 | N/A | N/A | 1 | 20.925 | N/A |
| NM_015889.8.5      | MED15    | chr22 | 20909222  | 20922918  | N/A | N/A | 1 | 20.925 | N/A |
| NM_032305.3.2      | POLR3GL  | chr1  | 145459651 | 145460263 | N/A | N/A | 1 | 20.925 | N/A |
| NR_103836.7.4      | -        | chr6  | 99323290  | 99353546  | N/A | N/A | 1 | 20.925 | N/A |
| NM_003223.4.2      | TFAP4    | chr16 | 4311779   | 4312702   | N/A | N/A | 1 | 20.925 | N/A |
| NM_032782.5.3      | HAVCR2   | chr5  | 156522316 | 156531760 | N/A | N/A | 1 | 20.925 | N/A |
| NM_014810.6.2      | CEP350   | chr1  | 179955303 | 179966310 | N/A | N/A | 1 | 20.925 | N/A |
| NM_001017373.9.6   | SAMD3    | chr6  | 130475969 | 130505768 | N/A | N/A | 1 | 20.925 | N/A |
| NM_032933.14.7     | TMEM241  | chr18 | 20889643  | 20953727  | N/A | N/A | 1 | 20.925 | N/A |
| NM_001048166.16.14 | STIL     | chr1  | 47725960  | 47735538  | N/A | N/A | 1 | 20.925 | N/A |
| NM_014868.6.2      | RNF10    | chr12 | 120984207 | 120995485 | N/A | N/A | 1 | 20.925 | N/A |
| NM_001127391.3.2   | ALS2CR12 | chr2  | 202215433 | 202216174 | N/A | N/A | 1 | 20.925 | N/A |
| NM_080650.8.4      | DPH6     | chr15 | 35665721  | 35747021  | N/A | N/A | 1 | 20.925 | N/A |
| NM_014868.6.5      | RNF10    | chr12 | 120995084 | 120995485 | N/A | N/A | 1 | 20.925 | N/A |

|                    |          |       |           |           |     |     |   |        |     |
|--------------------|----------|-------|-----------|-----------|-----|-----|---|--------|-----|
| NM_139179.7.3      | DAGLB    | chr7  | 6465618   | 6476164   | N/A | N/A | 1 | 20.925 | N/A |
| NM_015239.18.12    | AGTPBP1  | chr9  | 88211276  | 88261333  | N/A | N/A | 1 | 20.925 | N/A |
| NM_017746.11.6     | TEX10    | chr9  | 103082546 | 103092451 | N/A | N/A | 1 | 20.925 | N/A |
| NM_145037.6.5      | NXPE3    | chr3  | 101520078 | 101525970 | N/A | N/A | 1 | 20.925 | N/A |
| NM_001083893.10.8  | STRN3    | chr14 | 31382729  | 31398517  | N/A | N/A | 1 | 20.925 | N/A |
| NM_001178056.7.4   | PARP8    | chr5  | 50055476  | 50059076  | N/A | N/A | 1 | 20.925 | N/A |
| NM_015282.2.2      | CLASP1   | chr2  | 122363276 | 122363756 | N/A | N/A | 1 | 20.925 | N/A |
| NM_005575.8.5      | LNPEP    | chr5  | 96328718  | 96333849  | N/A | N/A | 1 | 20.925 | N/A |
| NM_003035.12.11    | STIL     | chr1  | 47745912  | 47748131  | N/A | N/A | 1 | 20.925 | N/A |
| NM_139015.6.2      | SPPL3    | chr12 | 121220457 | 121248689 | N/A | N/A | 1 | 20.925 | N/A |
| NM_005908.4.2      | MANBA    | chr4  | 103644027 | 103647840 | N/A | N/A | 1 | 20.925 | N/A |
| NM_139015.6.3      | SPPL3    | chr12 | 121220457 | 121229360 | N/A | N/A | 1 | 20.925 | N/A |
| NM_016824.13.10    | ADD3     | chr10 | 111883774 | 111890244 | N/A | N/A | 1 | 20.925 | N/A |
| NM_012199.11.9     | AGO1     | chr1  | 36367074  | 36367938  | N/A | N/A | 1 | 20.925 | N/A |
| NM_001282925.9.3   | ABI2     | chr2  | 204244930 | 204267457 | N/A | N/A | 1 | 20.925 | N/A |
| NM_001109662.45.42 | HECTD4   | chr12 | 112657189 | 112666615 | N/A | N/A | 1 | 20.925 | N/A |
| NM_025219.3.2      | DNAJC5   | chr20 | 62559687  | 62560878  | N/A | N/A | 1 | 20.925 | N/A |
| NM_001169107.5.3   | FAM21C   | chr10 | 46224309  | 46235694  | N/A | N/A | 1 | 20.925 | N/A |
| NM_018449.10.7     | UBAP2    | chr9  | 33960823  | 33973235  | N/A | N/A | 1 | 20.925 | N/A |
| NM_020978.9.2      | AMY2B    | chr1  | 104108056 | 104118162 | N/A | N/A | 1 | 20.925 | N/A |
| NM_006336.8.2      | ZER1     | chr9  | 131512894 | 131517938 | N/A | N/A | 1 | 20.925 | N/A |
| NM_001987.5.5      | ETV6     | chr12 | 12022357  | 12022903  | N/A | N/A | 1 | 20.925 | N/A |
| NM_001261826.3.2   | AP3D1    | chr19 | 2137725   | 2138713   | N/A | N/A | 1 | 20.925 | N/A |
| NM_014976.27.26    | PDCD11   | chr10 | 105197771 | 105198565 | N/A | N/A | 1 | 20.925 | N/A |
| NM_032581.10.2     | FAM126A  | chr7  | 22999874  | 23030758  | N/A | N/A | 1 | 20.925 | N/A |
| NM_020820.10.6     | PREX1    | chr20 | 47305194  | 47324959  | N/A | N/A | 1 | 20.925 | N/A |
| NM_007186.28.25    | CEP250   | chr20 | 34084405  | 34087998  | N/A | N/A | 1 | 20.925 | N/A |
| NM_000387.8.6      | SLC25A20 | chr3  | 48895939  | 48897060  | N/A | N/A | 1 | 20.925 | N/A |
| NM_022748.27.21    | TNS3     | chr7  | 47331552  | 47344601  | N/A | N/A | 1 | 20.925 | N/A |
| NM_017660.5.3      | GATAD2A  | chr19 | 19603114  | 19605192  | N/A | N/A | 1 | 20.925 | N/A |
| NM_198514.5.3      | NHLRC2   | chr10 | 115636279 | 115644139 | N/A | N/A | 1 | 20.925 | N/A |
| NM_014719.2.2      | TCAF1    | chr7  | 143573081 | 143573715 | N/A | N/A | 1 | 20.925 | N/A |
| NR_037705.5.2      | -        | chr16 | 89287404  | 89292039  | N/A | N/A | 1 | 20.925 | N/A |



|                    |          |       |           |           |     |     |   |        |     |
|--------------------|----------|-------|-----------|-----------|-----|-----|---|--------|-----|
| NM_005845.19.11    | ABCC4    | chr13 | 95813442  | 95839146  | N/A | N/A | 1 | 20.925 | N/A |
| NM_145862.10.9     | CHEK2    | chr22 | 29091697  | 29095925  | N/A | N/A | 1 | 20.925 | N/A |
| NM_020773.2.2      | TBC1D14  | chr4  | 6925099   | 6925838   | N/A | N/A | 1 | 20.925 | N/A |
| NM_002568.14.12    | PABPC1   | chr8  | 101716524 | 101717901 | N/A | N/A | 1 | 20.925 | N/A |
| NM_182641.7.5      | BPTF     | chr17 | 65887959  | 65890281  | N/A | N/A | 1 | 20.925 | N/A |
| NM_000324.9.2      | RHAG     | chr6  | 49574560  | 49587075  | N/A | N/A | 1 | 20.925 | N/A |
| NM_032167.9.5      | SNX29    | chr16 | 12136753  | 12155503  | N/A | N/A | 1 | 20.925 | N/A |
| NM_145799.9.9      | 38961    | chrX  | 118763280 | 118763471 | N/A | N/A | 1 | 20.925 | N/A |
| NM_007342.3.2      | NUPL2    | chr7  | 23224688  | 23226765  | N/A | N/A | 1 | 20.925 | N/A |
| NM_022897.24.23    | RANBP17  | chr5  | 170667931 | 170669824 | N/A | N/A | 1 | 20.925 | N/A |
| NM_173872.5.3      | CLCN3    | chr4  | 170601200 | 170610381 | N/A | N/A | 1 | 20.925 | N/A |
| NM_015255.34.32    | UBR2     | chr6  | 42630995  | 42633983  | N/A | N/A | 1 | 20.925 | N/A |
| NM_006219.14.8     | PIK3CB   | chr3  | 138407716 | 138431146 | N/A | N/A | 1 | 20.925 | N/A |
| NM_005899.14.11    | NBR1     | chr17 | 41345110  | 41347056  | N/A | N/A | 1 | 20.925 | N/A |
| NM_003750.5.4      | EIF3A    | chr10 | 120830397 | 120832565 | N/A | N/A | 1 | 20.925 | N/A |
| NM_001199692.7.3   | SLC4A2   | chr7  | 150761288 | 150764080 | N/A | N/A | 1 | 20.925 | N/A |
| NM_014611.23.22    | MDN1     | chr6  | 90461149  | 90463341  | N/A | N/A | 1 | 20.925 | N/A |
| NM_000632.14.7     | ITGAM    | chr16 | 31283167  | 31309275  | N/A | N/A | 1 | 20.925 | N/A |
| NM_001278651.4.3   | RANGAP1  | chr22 | 41670603  | 41677086  | N/A | N/A | 1 | 20.925 | N/A |
| NM_032815.5.4      | NFATC2IP | chr16 | 28967298  | 28967658  | N/A | N/A | 1 | 20.925 | N/A |
| NM_001211.22.13    | BUB1B    | chr15 | 40494605  | 40510763  | N/A | N/A | 1 | 20.925 | N/A |
| NM_181672.5.4      | OGT      | chrX  | 70764416  | 70767873  | N/A | N/A | 1 | 20.925 | N/A |
| NM_178835.4.3      | ZNF827   | chr4  | 146806829 | 146813567 | N/A | N/A | 1 | 20.925 | N/A |
| NM_020718.11.2     | USP31    | chr16 | 23096180  | 23119504  | N/A | N/A | 1 | 20.925 | N/A |
| NM_001144382.5.4   | PLCL2    | chr3  | 17051165  | 17056403  | N/A | N/A | 1 | 20.925 | N/A |
| NM_000124.20.6     | ERCC6    | chr10 | 50668418  | 50714058  | N/A | N/A | 1 | 20.925 | N/A |
| NR_029401.16.14    | -        | chr1  | 243222779 | 243229543 | N/A | N/A | 1 | 20.925 | N/A |
| NM_024635.6.4      | NAA35    | chr9  | 88573386  | 88577095  | N/A | N/A | 1 | 20.925 | N/A |
| NM_001193388.12.12 | UNKL     | chr16 | 1420130   | 1420358   | N/A | N/A | 1 | 20.925 | N/A |
| NM_032139.10.6     | ANKRD27  | chr19 | 33132929  | 33134537  | N/A | N/A | 1 | 20.925 | N/A |
| NM_001127391.7.2   | ALS2CR12 | chr2  | 202207092 | 202216174 | N/A | N/A | 1 | 20.925 | N/A |
| NM_014709.53.22    | USP34    | chr2  | 61468694  | 61546462  | N/A | N/A | 1 | 20.925 | N/A |
| NM_033395.7.2      | CEP295   | chr11 | 93399847  | 93412718  | N/A | N/A | 1 | 20.925 | N/A |

|                    |             |       |           |           |     |     |   |        |     |
|--------------------|-------------|-------|-----------|-----------|-----|-----|---|--------|-----|
| NR_015424.12.3     | -           | chr2  | 89076017  | 89092011  | N/A | N/A | 1 | 20.925 | N/A |
| NM_152327.17.16    | AK7         | chr14 | 96949335  | 96953393  | N/A | N/A | 1 | 20.925 | N/A |
| NM_032435.4.2      | RP5-862P8.2 | chr1  | 233482187 | 233490757 | N/A | N/A | 1 | 20.925 | N/A |
| NM_001284333.6.3   | TLK2        | chr17 | 60598133  | 60601692  | N/A | N/A | 1 | 20.925 | N/A |
| NM_001258374.23.23 | EPS15L1     | chr19 | 16472589  | 16472795  | N/A | N/A | 1 | 20.925 | N/A |
| NM_001039840.3.2   | CHIC1       | chrX  | 72797242  | 72804408  | N/A | N/A | 1 | 20.925 | N/A |
| NM_001160047.18.10 | TXNDC16     | chr14 | 52922041  | 52957723  | N/A | N/A | 1 | 20.925 | N/A |
| NM_001145001.5.3   | NEK6        | chr9  | 127064214 | 127076264 | N/A | N/A | 1 | 20.925 | N/A |
| NM_001244192.30.25 | KIAA0586    | chr14 | 58955338  | 58979345  | N/A | N/A | 1 | 20.925 | N/A |
| NM_017437.15.2     | CPSF2       | chr14 | 92592465  | 92627590  | N/A | N/A | 1 | 20.925 | N/A |
| NM_001195214.4.2   | YIPF6       | chrX  | 67733168  | 67741339  | N/A | N/A | 1 | 20.925 | N/A |
| NM_001698.6.2      | AUH         | chr9  | 94058302  | 94118437  | N/A | N/A | 1 | 20.925 | N/A |
| NM_012181.6.3      | FKBP8       | chr19 | 18648410  | 18650530  | N/A | N/A | 1 | 20.925 | N/A |
| NR_033676.6.4      | -           | chrX  | 106390972 | 106396733 | N/A | N/A | 1 | 20.925 | N/A |
| NM_000938.9.6      | POLR2B      | chr4  | 57861416  | 57871885  | N/A | N/A | 1 | 20.925 | N/A |
| NM_198596.3.2      | SULF2       | chr20 | 46365446  | 46386207  | N/A | N/A | 1 | 20.925 | N/A |
| NM_015542.21.15    | UPF2        | chr10 | 11971863  | 11994248  | N/A | N/A | 1 | 20.925 | N/A |
| NM_002466.9.8      | MYBL2       | chr20 | 42331129  | 42333998  | N/A | N/A | 1 | 20.925 | N/A |
| NM_017719.3.3      | SNRK        | chr3  | 43344589  | 43345284  | N/A | N/A | 1 | 20.925 | N/A |
| NM_001284499.7.2   | SLC43A2     | chr17 | 1486497   | 1496573   | N/A | N/A | 1 | 20.925 | N/A |
| NM_003105.5.4      | SORL1       | chr11 | 121358740 | 121360819 | N/A | N/A | 1 | 20.925 | N/A |
| NM_001282801.15.14 | SENP7       | chr3  | 101058938 | 101060623 | N/A | N/A | 1 | 20.925 | N/A |
| NM_015344.3.2      | LEPROTL1    | chr8  | 29959413  | 29962002  | N/A | N/A | 1 | 20.925 | N/A |
| NM_005494.5.4      | DNAJB6      | chr7  | 157159195 | 157160177 | N/A | N/A | 1 | 20.925 | N/A |
| NM_003703.12.5     | NOP14       | chr4  | 2946854   | 2955372   | N/A | N/A | 1 | 20.925 | N/A |
| NM_001033553.12.9  | SPECC1      | chr17 | 20150531  | 20163607  | N/A | N/A | 1 | 20.925 | N/A |
| NM_014822.22.20    | SEC24D      | chr4  | 119649715 | 119654067 | N/A | N/A | 1 | 20.925 | N/A |
| NM_022145.6.5      | CENPK       | chr5  | 64838628  | 64847463  | N/A | N/A | 1 | 20.925 | N/A |
| NR_104612.7.5      | -           | chr9  | 37768072  | 37770736  | N/A | N/A | 1 | 20.925 | N/A |
| NM_138426.6.3      | GLCCI1      | chr7  | 8062112   | 8110761   | N/A | N/A | 1 | 20.925 | N/A |
| NM_001004470.4.3   | ST8SIA6     | chr10 | 17401512  | 17432619  | N/A | N/A | 1 | 20.925 | N/A |
| NM_000234.9.8      | LIG1        | chr19 | 48653019  | 48653467  | N/A | N/A | 1 | 20.925 | N/A |
| NM_001024948.13.10 | FNBP1L      | chr1  | 94009663  | 94014983  | N/A | N/A | 1 | 20.925 | N/A |

|                    |          |       |           |           |     |     |   |        |     |
|--------------------|----------|-------|-----------|-----------|-----|-----|---|--------|-----|
| NM_001134778.5.4   | PBX3     | chr9  | 128691933 | 128697886 | N/A | N/A | 1 | 20.925 | N/A |
| NM_032320.6.3      | BTBD10   | chr11 | 13435076  | 13443385  | N/A | N/A | 1 | 20.925 | N/A |
| NM_005475.2.2      | SH2B3    | chr12 | 111855922 | 111856681 | N/A | N/A | 1 | 20.925 | N/A |
| NM_001257387.10.3  | CHEK2    | chr22 | 29095825  | 29121355  | N/A | N/A | 1 | 20.925 | N/A |
| NM_032900.7.3      | ARHGAP19 | chr10 | 99006028  | 99024663  | N/A | N/A | 1 | 20.925 | N/A |
| NM_001142936.7.6   | DAGLB    | chr7  | 6461357   | 6464466   | N/A | N/A | 1 | 20.925 | N/A |
| NM_004459.25.23    | BPTF     | chr17 | 65941524  | 65944422  | N/A | N/A | 1 | 20.925 | N/A |
| NM_207123.6.4      | GAB1     | chr4  | 144359151 | 144361535 | N/A | N/A | 1 | 20.925 | N/A |
| NM_018489.6.6      | ASH1L    | chr1  | 155385534 | 155385714 | N/A | N/A | 1 | 20.925 | N/A |
| NM_001494.6.2      | GDI2     | chr10 | 5827104   | 5842668   | N/A | N/A | 1 | 20.925 | N/A |
| NM_001373.36.31    | DNAH14   | chr1  | 225339706 | 225373127 | N/A | N/A | 1 | 20.925 | N/A |
| NM_000553.34.33    | WRN      | chr8  | 31014883  | 31024746  | N/A | N/A | 1 | 20.925 | N/A |
| NM_014109.20.14    | ATAD2    | chr8  | 124351550 | 124361684 | N/A | N/A | 1 | 20.925 | N/A |
| NM_174942.8.2      | GAS2L3   | chr12 | 100985513 | 101012365 | N/A | N/A | 1 | 20.925 | N/A |
| NM_000324.5.4      | RHAG     | chr6  | 49582399  | 49583484  | N/A | N/A | 1 | 20.925 | N/A |
| NM_015024.25.16    | XPO7     | chr8  | 21846513  | 21859783  | N/A | N/A | 1 | 20.925 | N/A |
| NM_001172712.5.4   | SP3      | chr2  | 174783320 | 174820960 | N/A | N/A | 1 | 20.925 | N/A |
| NM_014813.8.2      | LRIG2    | chr1  | 113633939 | 113638987 | N/A | N/A | 1 | 20.925 | N/A |
| NM_001010887.4.2   | ACER2    | chr9  | 19423859  | 19435082  | N/A | N/A | 1 | 20.925 | N/A |
| NM_194429.11.7     | FGFR1OP  | chr6  | 167435896 | 167447459 | N/A | N/A | 1 | 20.925 | N/A |
| NM_001001894.42.38 | TTC3     | chr21 | 38559349  | 38568337  | N/A | N/A | 1 | 20.925 | N/A |
| NM_022166.5.3      | XYLT1    | chr16 | 17292068  | 17353355  | N/A | N/A | 1 | 20.925 | N/A |
| NM_001009955.8.6   | SSBP3    | chr1  | 54717288  | 54722859  | N/A | N/A | 1 | 20.925 | N/A |
| NM_138798.6.4      | MITD1    | chr2  | 99786012  | 99787892  | N/A | N/A | 1 | 20.925 | N/A |
| NM_001100409.20.18 | SENP6    | chr6  | 76412360  | 76421132  | N/A | N/A | 1 | 20.925 | N/A |
| NM_020235.5.4      | BBX      | chr3  | 107429298 | 107435696 | N/A | N/A | 1 | 20.925 | N/A |
| NM_001198665.35.31 | ARHGEF12 | chr11 | 120345268 | 120348235 | N/A | N/A | 1 | 20.925 | N/A |
| NR_026580.4.4      | -        | chr13 | 114277494 | 114277601 | N/A | N/A | 1 | 20.925 | N/A |
| NM_000875.2.2      | IGF1R    | chr15 | 99250790  | 99251336  | N/A | N/A | 1 | 20.925 | N/A |
| NM_031921.7.3      | ATAD3B   | chr1  | 1414023   | 1417994   | N/A | N/A | 1 | 20.925 | N/A |
| NM_001114636.5.2   | FANCL    | chr2  | 58449076  | 58459247  | N/A | N/A | 1 | 20.925 | N/A |
| NM_032341.7.3      | DDI2     | chr1  | 15956819  | 15976318  | N/A | N/A | 1 | 20.925 | N/A |
| NM_018367.7.5      | ACER3    | chr11 | 76696686  | 76709865  | N/A | N/A | 1 | 20.925 | N/A |

|                    |         |       |           |           |     |     |   |        |     |
|--------------------|---------|-------|-----------|-----------|-----|-----|---|--------|-----|
| NM_003328.6.2      | TXK     | chr4  | 48106917  | 48116419  | N/A | N/A | 1 | 20.925 | N/A |
| NM_007367.7.3      | RALY    | chr20 | 32659871  | 32665051  | N/A | N/A | 1 | 20.925 | N/A |
| NM_005441.11.8     | CHAF1B  | chr21 | 37775055  | 37783902  | N/A | N/A | 1 | 20.925 | N/A |
| NM_003157.15.13    | NEK4    | chr3  | 52771601  | 52775515  | N/A | N/A | 1 | 20.925 | N/A |
| NM_030581.9.4      | WDR59   | chr16 | 74957823  | 74985441  | N/A | N/A | 1 | 20.925 | N/A |
| NM_021190.8.4      | PTBP2   | chr1  | 97235258  | 97250810  | N/A | N/A | 1 | 20.925 | N/A |
| NR_103780.8.2      | -       | chr4  | 77045801  | 77065626  | N/A | N/A | 1 | 20.925 | N/A |
| NM_022111.20.15    | CLSPN   | chr1  | 36204736  | 36212593  | N/A | N/A | 1 | 20.925 | N/A |
| NM_024757.25.16    | EHMT1   | chr9  | 140685299 | 140712590 | N/A | N/A | 1 | 20.925 | N/A |
| NM_013396.7.4      | USP25   | chr21 | 17150222  | 17177577  | N/A | N/A | 1 | 20.925 | N/A |
| NM_032421.6.5      | CLIP2   | chr7  | 73770739  | 73771807  | N/A | N/A | 1 | 20.925 | N/A |
| NM_006811.4.2      | SERINC3 | chr20 | 43139929  | 43142681  | N/A | N/A | 1 | 20.925 | N/A |
| NM_001173539.4.2   | BANP    | chr16 | 88008653  | 88017865  | N/A | N/A | 1 | 20.925 | N/A |
| NM_004360.9.3      | CDH1    | chr16 | 68835572  | 68847398  | N/A | N/A | 1 | 20.925 | N/A |
| NM_001033024.5.2   | FBXO7   | chr22 | 32875119  | 32883815  | N/A | N/A | 1 | 20.925 | N/A |
| NM_016106.6.2      | SCFD1   | chr14 | 31097414  | 31109070  | N/A | N/A | 1 | 20.925 | N/A |
| NM_030647.12.11    | KDM7A   | chr7  | 139801750 | 139810984 | N/A | N/A | 1 | 20.925 | N/A |
| NM_001126050.5.2   | HDGF    | chr1  | 156713443 | 156715165 | N/A | N/A | 1 | 20.925 | N/A |
| NM_005534.4.3      | IFNGR2  | chr21 | 34793786  | 34799339  | N/A | N/A | 1 | 20.925 | N/A |
| NM_002631.8.5      | PGD     | chr1  | 10464217  | 10473308  | N/A | N/A | 1 | 20.925 | N/A |
| NM_000375.9.7      | UROS    | chr10 | 127483448 | 127486714 | N/A | N/A | 1 | 20.925 | N/A |
| NM_001080424.15.13 | KDM6B   | chr17 | 7753389   | 7754712   | N/A | N/A | 1 | 20.925 | N/A |
| NM_003681.6.5      | PDXK    | chr21 | 45165959  | 45168961  | N/A | N/A | 1 | 20.925 | N/A |
| NM_000210.24.21    | ITGA6   | chr2  | 173355751 | 173362828 | N/A | N/A | 1 | 20.925 | N/A |
| NM_001177599.9.7   | SUCLG2  | chr3  | 67546221  | 67559327  | N/A | N/A | 1 | 20.925 | N/A |
| NM_006292.7.2      | TSG101  | chr11 | 18524032  | 18541150  | N/A | N/A | 1 | 20.925 | N/A |
| NM_001135638.14.13 | PIP5K1A | chr1  | 151214598 | 151215043 | N/A | N/A | 1 | 20.925 | N/A |
| NM_015113.16.15    | ZZEF1   | chr17 | 3988963   | 3989949   | N/A | N/A | 1 | 20.925 | N/A |
| NM_032012.17.12    | TMEM245 | chr9  | 111795586 | 111819602 | N/A | N/A | 1 | 20.925 | N/A |
| NM_006401.3.2      | ANP32B  | chr9  | 100756912 | 100760960 | N/A | N/A | 1 | 20.925 | N/A |
| NM_139132.8.6      | NUP98   | chr11 | 3789810   | 3794969   | N/A | N/A | 1 | 20.925 | N/A |
| NM_005788.7.6      | PRMT3   | chr11 | 20417348  | 20419267  | N/A | N/A | 1 | 20.925 | N/A |
| NM_001256140.8.6   | CAPG    | chr2  | 85625142  | 85626408  | N/A | N/A | 1 | 20.925 | N/A |

|                    |          |       |           |           |     |     |   |        |     |
|--------------------|----------|-------|-----------|-----------|-----|-----|---|--------|-----|
| NM_139132.8.7      | NUP98    | chr11 | 3789810   | 3793158   | N/A | N/A | 1 | 20.925 | N/A |
| NM_001260.4.2      | CDK8     | chr13 | 26911703  | 26928017  | N/A | N/A | 1 | 20.925 | N/A |
| NM_001077261.15.11 | NCOR2    | chr12 | 124904502 | 124915333 | N/A | N/A | 1 | 20.925 | N/A |
| NM_006251.8.3      | PRKAA1   | chr5  | 40764615  | 40775605  | N/A | N/A | 1 | 20.925 | N/A |
| NM_000265.4.3      | NCF1     | chr7  | 74193427  | 74193768  | N/A | N/A | 1 | 20.925 | N/A |
| NM_001286431.7.5   | REV3L    | chr6  | 111726672 | 111737675 | N/A | N/A | 1 | 20.925 | N/A |
| NM_001146156.9.8   | GSK3B    | chr3  | 119582265 | 119595355 | N/A | N/A | 1 | 20.925 | N/A |
| NM_001243942.8.2   | PRPSAP2  | chr17 | 18768781  | 18814564  | N/A | N/A | 1 | 20.925 | N/A |
| NM_024066.7.3      | ERI3     | chr1  | 44750506  | 44804994  | N/A | N/A | 1 | 20.925 | N/A |
| NM_001014972.24.24 | ZNF638   | chr2  | 71653589  | 71654544  | N/A | N/A | 1 | 20.925 | N/A |
| NM_152419.10.4     | HGSNAT   | chr8  | 43014065  | 43033377  | N/A | N/A | 1 | 20.925 | N/A |
| NM_033505.6.2      | EPT1     | chr2  | 26587169  | 26598016  | N/A | N/A | 1 | 20.925 | N/A |
| NM_032582.7.6      | USP32    | chr17 | 58346810  | 58348842  | N/A | N/A | 1 | 20.925 | N/A |
| NM_017895.14.10    | DDX27    | chr20 | 47849842  | 47853047  | N/A | N/A | 1 | 20.925 | N/A |
| NM_022486.11.10    | SUSD1    | chr9  | 114842353 | 114860942 | N/A | N/A | 1 | 20.925 | N/A |
| NM_172373.8.6      | ELF1     | chr13 | 41515056  | 41518061  | N/A | N/A | 1 | 20.925 | N/A |
| NM_021259.8.5      | TMEM8A   | chr16 | 425132    | 426812    | N/A | N/A | 1 | 20.925 | N/A |
| NM_005935.11.8     | AFF1     | chr4  | 88026779  | 88036451  | N/A | N/A | 1 | 20.925 | N/A |
| NM_175854.13.7     | PAN3     | chr13 | 28830428  | 28845003  | N/A | N/A | 1 | 20.925 | N/A |
| NM_001242899.3.2   | PPP6R2   | chr22 | 50810448  | 50832564  | N/A | N/A | 1 | 20.925 | N/A |
| NM_002115.14.13    | HK3      | chr5  | 176311039 | 176314122 | N/A | N/A | 1 | 20.925 | N/A |
| NM_003693.10.9     | SCARF1   | chr17 | 1540002   | 1540356   | N/A | N/A | 1 | 20.925 | N/A |
| NM_002508.12.10    | NID1     | chr1  | 236175220 | 236180573 | N/A | N/A | 1 | 20.925 | N/A |
| NM_001110781.7.6   | SLC35E2B | chr1  | 1601102   | 1601590   | N/A | N/A | 1 | 20.925 | N/A |
| NM_153050.8.3      | MTMR3    | chr22 | 30366964  | 30394846  | N/A | N/A | 1 | 20.925 | N/A |
| NM_031844.12.11    | HNRNPU   | chr1  | 245018725 | 245019460 | N/A | N/A | 1 | 20.925 | N/A |
| NM_001164161.19.10 | PPP6R3   | chr11 | 68334481  | 68363686  | N/A | N/A | 1 | 20.925 | N/A |
| NM_178450.4.2      | 37681    | chr5  | 126213876 | 126253919 | N/A | N/A | 1 | 20.925 | N/A |
| NM_152227.6.5      | SNX5     | chr20 | 17933230  | 17934761  | N/A | N/A | 1 | 20.925 | N/A |
| NM_001130823.13.6  | DNMT1    | chr19 | 10273342  | 10288043  | N/A | N/A | 1 | 20.925 | N/A |
| NM_001128212.9.2   | WDSUB1   | chr2  | 160112706 | 160139604 | N/A | N/A | 1 | 20.925 | N/A |
| NM_001289403.7.4   | MMS19    | chr10 | 99236439  | 99238146  | N/A | N/A | 1 | 20.925 | N/A |
| NM_014676.14.14    | PUM1     | chr1  | 31437520  | 31437757  | N/A | N/A | 1 | 20.925 | N/A |

|                    |          |       |           |           |     |     |   |        |     |
|--------------------|----------|-------|-----------|-----------|-----|-----|---|--------|-----|
| NM_001099271.10.5  | POC5     | chr5  | 74981031  | 74998635  | N/A | N/A | 1 | 20.925 | N/A |
| NM_018027.19.16    | FRMD4A   | chr10 | 13705452  | 13717044  | N/A | N/A | 1 | 20.925 | N/A |
| NM_001128148.16.10 | TFRC     | chr3  | 195785154 | 195792471 | N/A | N/A | 1 | 20.925 | N/A |
| NR_003187.8.3      | -        | chr7  | 74576463  | 74582682  | N/A | N/A | 1 | 20.925 | N/A |
| NM_014616.25.22    | ATP11B   | chr3  | 182602540 | 182607336 | N/A | N/A | 1 | 20.925 | N/A |
| NM_001177387.3.1   | ATXN7    | chr3  | 63884074  | 63898901  | N/A | N/A | 1 | 20.925 | N/A |
| NM_001166691.16.13 | TTK      | chr6  | 80737601  | 80745134  | N/A | N/A | 1 | 20.925 | N/A |
| NM_024570.9.2      | RNASEH2B | chr13 | 51501542  | 51523641  | N/A | N/A | 1 | 20.925 | N/A |
| NM_001278716.9.2   | FBXL4    | chr6  | 99323290  | 99382755  | N/A | N/A | 1 | 20.925 | N/A |
| NM_001167582.13.12 | RBM6     | chr3  | 50102463  | 50103935  | N/A | N/A | 1 | 20.925 | N/A |
| NM_017772.10.9     | TBC1D22B | chr6  | 37280693  | 37281667  | N/A | N/A | 1 | 20.925 | N/A |
| NM_001256667.14.7  | FAM193A  | chr4  | 2659529   | 2692697   | N/A | N/A | 1 | 20.925 | N/A |
| NM_001010989.6.5   | HERPUD1  | chr16 | 56973148  | 56974157  | N/A | N/A | 1 | 20.925 | N/A |
| NM_000254.8.3      | MTR      | chr1  | 236969443 | 236979843 | N/A | N/A | 1 | 20.925 | N/A |
| NM_001206704.7.4   | SP100    | chr2  | 231307651 | 231313865 | N/A | N/A | 1 | 20.925 | N/A |
| NM_020846.5.3      | SLAIN2   | chr4  | 48379912  | 48384944  | N/A | N/A | 1 | 20.925 | N/A |
| NM_032590.12.7     | KDM2B    | chr12 | 121932381 | 121972495 | N/A | N/A | 1 | 20.925 | N/A |
| NM_015355.10.7     | SUZ12    | chr17 | 30302500  | 30315516  | N/A | N/A | 1 | 20.925 | N/A |
| NM_020954.11.9     | RNF213   | chr17 | 78268518  | 78272318  | N/A | N/A | 1 | 20.925 | N/A |
| NM_138495.2.2      | ATXN7L1  | chr7  | 105305512 | 105305735 | N/A | N/A | 1 | 20.925 | N/A |
| NM_203437.6.3      | AFTPH    | chr2  | 64794695  | 64800202  | N/A | N/A | 1 | 20.925 | N/A |
| NM_005761.5.3      | PLXNC1   | chr12 | 94575221  | 94603480  | N/A | N/A | 1 | 20.925 | N/A |
| NM_006699.6.2      | MAN1A2   | chr1  | 117944807 | 117984947 | N/A | N/A | 1 | 20.925 | N/A |
| NM_002158.3.2      | FOXN2    | chr2  | 48555699  | 48573890  | N/A | N/A | 1 | 20.925 | N/A |
| NM_015626.6.3      | WSB1     | chr17 | 25630392  | 25636298  | N/A | N/A | 1 | 20.925 | N/A |
| NM_006733.14.13    | CENPI    | chrX  | 100387178 | 100387445 | N/A | N/A | 1 | 20.925 | N/A |
| NM_012335.4.2      | MYO1F    | chr19 | 8619360   | 8620680   | N/A | N/A | 1 | 20.925 | N/A |
| NM_020943.19.18    | CWC22    | chr2  | 180815238 | 180815653 | N/A | N/A | 1 | 20.925 | N/A |
| NM_175854.17.7     | PAN3     | chr13 | 28830428  | 28855516  | N/A | N/A | 1 | 20.925 | N/A |
| NM_015348.40.32    | TMEM131  | chr2  | 98375355  | 98392481  | N/A | N/A | 1 | 20.925 | N/A |
| NM_018449.12.7     | UBAP2    | chr9  | 33953282  | 33973235  | N/A | N/A | 1 | 20.925 | N/A |
| NM_024757.18.17    | EHMT1    | chr9  | 140693264 | 140695436 | N/A | N/A | 1 | 20.925 | N/A |
| NM_005474.16.13    | HDAC5    | chr17 | 42161922  | 42165064  | N/A | N/A | 1 | 20.925 | N/A |

|                    |          |       |           |           |     |     |   |        |     |
|--------------------|----------|-------|-----------|-----------|-----|-----|---|--------|-----|
| NM_001257137.21.16 | ITCH     | chr20 | 33057852  | 33069011  | N/A | N/A | 1 | 20.925 | N/A |
| NM_002041.6.5      | GABPB1   | chr15 | 50592985  | 50593565  | N/A | N/A | 1 | 20.925 | N/A |
| NM_018052.12.11    | VAC14    | chr16 | 70796442  | 70796928  | N/A | N/A | 1 | 20.925 | N/A |
| NM_004398.12.11    | DDX10    | chr11 | 108586605 | 108590612 | N/A | N/A | 1 | 20.925 | N/A |
| NM_007199.8.2      | IRAK3    | chr12 | 66597490  | 66622150  | N/A | N/A | 1 | 20.925 | N/A |
| NM_001206947.12.10 | PICALM   | chr11 | 85707868  | 85712201  | N/A | N/A | 1 | 20.925 | N/A |
| NM_003400.9.7      | XPO1     | chr2  | 61725807  | 61727029  | N/A | N/A | 1 | 20.925 | N/A |
| NM_030816.9.6      | ANKRD13C | chr1  | 70758070  | 70771973  | N/A | N/A | 1 | 20.925 | N/A |
| NM_020193.7.5      | EMSY     | chr11 | 76169226  | 76175124  | N/A | N/A | 1 | 20.925 | N/A |
| NM_018090.7.6      | NECAP2   | chr1  | 16778332  | 16782388  | N/A | N/A | 1 | 20.925 | N/A |
| NM_003074.26.22    | SMARCC1  | chr3  | 47651555  | 47680270  | N/A | N/A | 1 | 20.925 | N/A |
| NM_025004.13.10    | CCDC15   | chr11 | 124862475 | 124875108 | N/A | N/A | 1 | 20.925 | N/A |
| NM_139132.14.11    | NUP98    | chr11 | 3752620   | 3774638   | N/A | N/A | 1 | 20.925 | N/A |
| NM_001282771.8.4   | ANKMY1   | chr2  | 241463301 | 241492474 | N/A | N/A | 1 | 20.925 | N/A |
| NR_102333.7.3      | -        | chr19 | 42311148  | 42314935  | N/A | N/A | 1 | 20.925 | N/A |
| NM_024809.9.7      | TCTN2    | chr12 | 124172597 | 124177270 | N/A | N/A | 1 | 20.925 | N/A |
| NM_001144823.11.3  | DENND4A  | chr15 | 66021409  | 66048810  | N/A | N/A | 1 | 20.925 | N/A |
| NM_001006941.5.2   | ALG3     | chr3  | 183962388 | 183963600 | N/A | N/A | 1 | 20.925 | N/A |
| NM_006516.4.3      | SLC2A1   | chr1  | 43396296  | 43396877  | N/A | N/A | 1 | 20.925 | N/A |
| NM_001199699.9.8   | DHX33    | chr17 | 5353522   | 5354254   | N/A | N/A | 1 | 20.925 | N/A |
| NM_000181.11.5     | GUSB     | chr7  | 65429309  | 65441189  | N/A | N/A | 1 | 20.925 | N/A |
| NM_139241.6.5      | FGD4     | chr12 | 32751430  | 32754357  | N/A | N/A | 1 | 20.925 | N/A |
| NM_004726.17.15    | REPS2    | chrX  | 17151946  | 17157084  | N/A | N/A | 1 | 20.925 | N/A |
| NM_015346.35.33    | ZFYVE26  | chr14 | 68228082  | 68229536  | N/A | N/A | 1 | 20.925 | N/A |
| NM_001746.6.2      | CANX     | chr5  | 179132679 | 179136060 | N/A | N/A | 1 | 20.925 | N/A |
| NM_005923.8.4      | MAP3K5   | chr6  | 136990420 | 137019820 | N/A | N/A | 1 | 20.925 | N/A |
| NM_004397.4.2      | DDX6     | chr11 | 118650340 | 118657227 | N/A | N/A | 1 | 20.925 | N/A |
| NM_003502.5.4      | AXIN1    | chr16 | 354303    | 360069    | N/A | N/A | 1 | 20.925 | N/A |
| NM_015091.5.3      | FAM179B  | chr14 | 45468565  | 45475470  | N/A | N/A | 1 | 20.925 | N/A |
| NM_001142300.5.2   | CCNYL1   | chr2  | 208589523 | 208607066 | N/A | N/A | 1 | 20.925 | N/A |
| NM_030647.10.7     | KDM7A    | chr7  | 139813290 | 139824583 | N/A | N/A | 1 | 20.925 | N/A |
| NM_030819.2.2      | GFOD2    | chr16 | 67719359  | 67719705  | N/A | N/A | 1 | 20.925 | N/A |
| NR_024497.6.5      | -        | chr10 | 38727785  | 38734535  | N/A | N/A | 1 | 20.925 | N/A |

|                   |         |       |           |           |     |     |   |        |     |
|-------------------|---------|-------|-----------|-----------|-----|-----|---|--------|-----|
| NM_032773.4.2     | LRCH3   | chr3  | 197541778 | 197547301 | N/A | N/A | 1 | 20.925 | N/A |
| NM_002209.6.5     | ITGAL   | chr16 | 30490411  | 30490782  | N/A | N/A | 1 | 20.925 | N/A |
| NM_00119555.10.9  | CLINT1  | chr5  | 157218710 | 157221980 | N/A | N/A | 1 | 20.925 | N/A |
| NM_015239.25.18   | AGTPBP1 | chr9  | 88190229  | 88211364  | N/A | N/A | 1 | 20.925 | N/A |
| NM_015395.17.16   | TECPR1  | chr7  | 97857325  | 97858478  | N/A | N/A | 1 | 20.925 | N/A |
| NM_001282806.5.2  | 39142   | chr2  | 160585519 | 160609082 | N/A | N/A | 1 | 20.925 | N/A |
| NM_018201.9.8     | TBC1D13 | chr9  | 131565528 | 131566398 | N/A | N/A | 1 | 20.925 | N/A |
| NM_001754.7.5     | RUNX1   | chr21 | 36206706  | 36253010  | N/A | N/A | 1 | 20.925 | N/A |
| NM_015033.10.7    | FNBP1   | chr9  | 132686122 | 132691974 | N/A | N/A | 1 | 20.925 | N/A |
| NM_199141.14.4    | CARM1   | chr19 | 11019778  | 11031803  | N/A | N/A | 1 | 20.925 | N/A |
| NM_015542.8.4     | UPF2    | chr10 | 12039670  | 12056183  | N/A | N/A | 1 | 20.925 | N/A |
| NM_001289003.14.7 | PHLPP2  | chr16 | 71692135  | 71713438  | N/A | N/A | 1 | 20.925 | N/A |
| NM_001145112.7.6  | PATL2   | chr15 | 44964212  | 44964654  | N/A | N/A | 1 | 20.925 | N/A |
| NM_030752.6.2     | TCP1    | chr6  | 160205697 | 160209175 | N/A | N/A | 1 | 20.925 | N/A |
| NM_173638.3.1     | NBPF15  | chr1  | 148560846 | 148568877 | N/A | N/A | 1 | 20.925 | N/A |
| NM_016604.12.8    | KDM3B   | chr5  | 137726701 | 137750928 | N/A | N/A | 1 | 20.925 | N/A |
| NM_033071.107.104 | SYNE1   | chr6  | 152560667 | 152570397 | N/A | N/A | 1 | 20.925 | N/A |
| NM_016955.6.2     | SEPSECS | chr4  | 25153581  | 25160729  | N/A | N/A | 1 | 20.925 | N/A |
| NM_032043.10.8    | BRIP1   | chr17 | 59870957  | 59878835  | N/A | N/A | 1 | 20.925 | N/A |
| NM_001282919.5.3  | SPIDR   | chr8  | 48196616  | 48206619  | N/A | N/A | 1 | 20.925 | N/A |
| NM_001206736.7.2  | NSFL1C  | chr20 | 1433137   | 1445071   | N/A | N/A | 1 | 20.925 | N/A |
| NM_001282753.11.9 | TLE4    | chr9  | 82319697  | 82323701  | N/A | N/A | 1 | 20.925 | N/A |
| NM_004843.4.3     | IL27RA  | chr19 | 14150319  | 14150722  | N/A | N/A | 1 | 20.925 | N/A |
| NM_012305.16.15   | AP2A2   | chr11 | 1000431   | 1003804   | N/A | N/A | 1 | 20.925 | N/A |
| NM_014630.3.2     | ZNF592  | chr15 | 85307937  | 85321543  | N/A | N/A | 1 | 20.925 | N/A |
| NM_024820.9.2     | DENND1A | chr9  | 126414291 | 126641300 | N/A | N/A | 1 | 20.925 | N/A |
| NM_013255.6.3     | MKLN1   | chr7  | 131071878 | 131084192 | N/A | N/A | 1 | 20.925 | N/A |
| NM_152608.6.6     | SDE2    | chr1  | 226175596 | 226176089 | N/A | N/A | 1 | 20.925 | N/A |
| NM_007318.3.2     | PSEN1   | chr14 | 73614502  | 73614802  | N/A | N/A | 1 | 20.925 | N/A |
| NM_016166.6.3     | PIAS1   | chr15 | 68434283  | 68439038  | N/A | N/A | 1 | 20.925 | N/A |
| NM_153813.3.2     | ZFPM1   | chr16 | 88552346  | 88555561  | N/A | N/A | 1 | 20.925 | N/A |
| NM_001145160.6.3  | TPM4    | chr19 | 16192722  | 16199930  | N/A | N/A | 1 | 20.925 | N/A |
| NM_015243.6.4     | VPS13B  | chr8  | 100108539 | 100123507 | N/A | N/A | 1 | 20.925 | N/A |



|                    |                |       |           |           |     |     |   |        |     |
|--------------------|----------------|-------|-----------|-----------|-----|-----|---|--------|-----|
| NM_030808.7.2      | NDEL1          | chr17 | 8347577   | 8358205   | N/A | N/A | 1 | 20.925 | N/A |
| NM_053005.4.3      | MOB2           | chr11 | 1501622   | 1502115   | N/A | N/A | 1 | 20.925 | N/A |
| NM_024813.12.9     | RPAP2          | chr1  | 92798947  | 92846430  | N/A | N/A | 1 | 20.925 | N/A |
| NM_001193476.11.10 | SLC26A8        | chr6  | 35936653  | 35943265  | N/A | N/A | 1 | 20.925 | N/A |
| NM_007282.8.3      | RNF13          | chr3  | 149563797 | 149629870 | N/A | N/A | 1 | 20.925 | N/A |
| NM_006733.17.16    | CENPI          | chrX  | 100400052 | 100401266 | N/A | N/A | 1 | 20.925 | N/A |
| NM_018261.17.15    | EXOC1          | chr4  | 56759717  | 56766050  | N/A | N/A | 1 | 20.925 | N/A |
| NM_138771.3.3      | CCDC126        | chr7  | 23650789  | 23651172  | N/A | N/A | 1 | 20.925 | N/A |
| NR_040723.12.8     | -              | chr20 | 34302106  | 34313077  | N/A | N/A | 1 | 20.925 | N/A |
| NM_018190.15.13    | BBS7           | chr4  | 122754385 | 122760851 | N/A | N/A | 1 | 20.925 | N/A |
| NR_024460.10.8     | -              | chr3  | 56626997  | 56628056  | N/A | N/A | 1 | 20.925 | N/A |
| NM_006031.27.25    | PCNT           | chr21 | 47819503  | 47822397  | N/A | N/A | 1 | 20.925 | N/A |
| NM_001278209.18.13 | NUP153         | chr6  | 17632880  | 17649531  | N/A | N/A | 1 | 20.925 | N/A |
| NM_000052.4.3      | ATP7A          | chrX  | 77243737  | 77245454  | N/A | N/A | 1 | 20.925 | N/A |
| NR_073547.14.10    | -              | chr14 | 79423584  | 79454484  | N/A | N/A | 1 | 20.925 | N/A |
| NM_020409.6.2      | MRPL47         | chr3  | 179310431 | 179320585 | N/A | N/A | 1 | 20.925 | N/A |
| NM_006437.12.2     | PARP4          | chr13 | 25058790  | 25077915  | N/A | N/A | 1 | 20.925 | N/A |
| NM_001605.13.12    | AARS           | chr16 | 70294946  | 70296427  | N/A | N/A | 1 | 20.925 | N/A |
| NM_199203.4.3      | TMEM189-UBE2V1 | chr20 | 48746082  | 48747484  | N/A | N/A | 1 | 20.925 | N/A |
| NM_006437.12.8     | PARP4          | chr13 | 25058790  | 25067871  | N/A | N/A | 1 | 20.925 | N/A |
| NM_173496.13.6     | MPP7           | chr10 | 28408579  | 28438988  | N/A | N/A | 1 | 20.925 | N/A |
| NM_001282938.12.4  | STIL           | chr1  | 47753222  | 47770668  | N/A | N/A | 1 | 20.925 | N/A |
| NM_052985.8.4      | IFT122         | chr3  | 129177441 | 129183624 | N/A | N/A | 1 | 20.925 | N/A |
| NM_001286790.4.2   | CNOT6L         | chr4  | 78694234  | 78697546  | N/A | N/A | 1 | 20.925 | N/A |
| NM_145647.11.9     | TBC1D31        | chr8  | 124121556 | 124132428 | N/A | N/A | 1 | 20.925 | N/A |
| NR_034059.15.7     | -              | chr2  | 231940224 | 231951895 | N/A | N/A | 1 | 20.925 | N/A |
| NM_000436.16.13    | OXCT1          | chr5  | 41739491  | 41794180  | N/A | N/A | 1 | 20.925 | N/A |
| NR_027862.3.2      | -              | chr2  | 172782046 | 172809519 | N/A | N/A | 1 | 20.925 | N/A |
| NM_005898.11.10    | CAPRIN1        | chr11 | 34107610  | 34107960  | N/A | N/A | 1 | 20.925 | N/A |
| NM_001166005.16.10 | EPB41          | chr1  | 29362337  | 29391670  | N/A | N/A | 1 | 20.925 | N/A |
| NM_001256135.23.19 | CSE1L          | chr20 | 47707278  | 47711500  | N/A | N/A | 1 | 20.925 | N/A |
| NM_016281.14.12    | TAOK3          | chr12 | 118627611 | 118639268 | N/A | N/A | 1 | 20.925 | N/A |
| NM_024790.3.2      | CSPP1          | chr8  | 67986477  | 67988816  | N/A | N/A | 1 | 20.925 | N/A |

|                    |         |       |           |           |     |     |   |        |     |
|--------------------|---------|-------|-----------|-----------|-----|-----|---|--------|-----|
| NM_021629.8.2      | GNB4    | chr3  | 179131199 | 179144030 | N/A | N/A | 1 | 20.925 | N/A |
| NM_021629.8.5      | GNB4    | chr3  | 179131199 | 179134344 | N/A | N/A | 1 | 20.925 | N/A |
| NM_152671.5.4      | PIKFYVE | chr2  | 209150449 | 209153542 | N/A | N/A | 1 | 20.925 | N/A |
| NM_020840.12.11    | FNIP2   | chr4  | 159782493 | 159782928 | N/A | N/A | 1 | 20.925 | N/A |
| NM_003648.17.15    | DGKD    | chr2  | 234358627 | 234360706 | N/A | N/A | 1 | 20.925 | N/A |
| NR_002453.11.7     | -       | chr16 | 30299881  | 30306012  | N/A | N/A | 1 | 20.925 | N/A |
| NM_025083.3.2      | EDC3    | chr15 | 74963795  | 74967483  | N/A | N/A | 1 | 20.925 | N/A |
| NM_012430.6.3      | SEC22A  | chr3  | 122942405 | 122978436 | N/A | N/A | 1 | 20.925 | N/A |
| NM_199166.7.5      | ALAS1   | chr3  | 52238708  | 52240767  | N/A | N/A | 1 | 20.925 | N/A |
| NM_182641.2.2      | BPTF    | chr17 | 65850055  | 65850878  | N/A | N/A | 1 | 20.925 | N/A |
| NM_006754.5.3      | SYPL1   | chr7  | 105733394 | 105739728 | N/A | N/A | 1 | 20.925 | N/A |
| NM_001247996.10.4  | ASAP1   | chr8  | 131191509 | 131370389 | N/A | N/A | 1 | 20.925 | N/A |
| NM_004738.5.4      | VAPB    | chr20 | 57014000  | 57016139  | N/A | N/A | 1 | 20.925 | N/A |
| NR_027949.15.12    | -       | chr12 | 1480998   | 1553916   | N/A | N/A | 1 | 20.925 | N/A |
| NM_001286189.6.4   | SCAF8   | chr6  | 155095122 | 155109156 | N/A | N/A | 1 | 20.925 | N/A |
| NM_001131010.9.2   | SATB1   | chr3  | 18419661  | 18462483  | N/A | N/A | 1 | 20.925 | N/A |
| NM_001113492.3.3   | 40057   | chr17 | 75398140  | 75398785  | N/A | N/A | 1 | 20.925 | N/A |
| NM_000651.27.5     | CR1     | chr1  | 207696955 | 207743291 | N/A | N/A | 1 | 20.925 | N/A |
| NM_014415.3.2      | ZBTB11  | chr3  | 101389973 | 101391057 | N/A | N/A | 1 | 20.925 | N/A |
| NM_001284363.9.6   | TLK2    | chr17 | 60629662  | 60642498  | N/A | N/A | 1 | 20.925 | N/A |
| NM_001876.6.3      | CPT1A   | chr11 | 68566685  | 68580044  | N/A | N/A | 1 | 20.925 | N/A |
| NM_001161344.12.11 | CHFR    | chr12 | 133428203 | 133430159 | N/A | N/A | 1 | 20.925 | N/A |
| NR_027671.11.2     | -       | chr2  | 128855002 | 128880820 | N/A | N/A | 1 | 20.925 | N/A |
| NM_001195215.10.6  | DENND1B | chr1  | 197611840 | 197627499 | N/A | N/A | 1 | 20.925 | N/A |
| NM_001286277.11.8  | TUBGCP3 | chr13 | 113200012 | 113208496 | N/A | N/A | 1 | 20.925 | N/A |
| NM_013448.3.3      | BAZ1A   | chr14 | 35331249  | 35331528  | N/A | N/A | 1 | 20.925 | N/A |
| NM_002111.6.2      | HTT     | chr4  | 3088665   | 3109150   | N/A | N/A | 1 | 20.925 | N/A |
| NM_018706.16.2     | DHTKD1  | chr10 | 12123470  | 12162266  | N/A | N/A | 1 | 20.925 | N/A |
| NM_003400.24.21    | XPO1    | chr2  | 61708319  | 61711240  | N/A | N/A | 1 | 20.925 | N/A |
| NM_003384.11.4     | VRK1    | chr14 | 97312431  | 97327072  | N/A | N/A | 1 | 20.925 | N/A |
| NM_004333.13.4     | BRAF    | chr7  | 140476711 | 140508795 | N/A | N/A | 1 | 20.925 | N/A |
| NM_031217.10.4     | KIF18A  | chr11 | 28098553  | 28113060  | N/A | N/A | 1 | 20.925 | N/A |
| NM_014864.4.2      | FAM20B  | chr1  | 179012849 | 179023773 | N/A | N/A | 1 | 20.925 | N/A |

|                    |          |       |           |           |     |     |   |        |     |
|--------------------|----------|-------|-----------|-----------|-----|-----|---|--------|-----|
| NM_002661.5.3      | PLCG2    | chr16 | 81888048  | 81892768  | N/A | N/A | 1 | 20.925 | N/A |
| NM_020314.20.13    | C16orf62 | chr16 | 19627435  | 19648978  | N/A | N/A | 1 | 20.925 | N/A |
| NM_014023.11.6     | WDR37    | chr10 | 1130342   | 1151207   | N/A | N/A | 1 | 20.925 | N/A |
| NM_025160.6.4      | WDR26    | chr1  | 224605961 | 224612356 | N/A | N/A | 1 | 20.925 | N/A |
| NM_030877.7.6      | CTNNB1   | chr20 | 36393598  | 36396446  | N/A | N/A | 1 | 20.925 | N/A |
| NM_014153.9.4      | ZC3H7A   | chr16 | 11868091  | 11873219  | N/A | N/A | 1 | 20.925 | N/A |
| NM_015435.9.7      | RNF19A   | chr8  | 101273769 | 101277013 | N/A | N/A | 1 | 20.925 | N/A |
| NM_014823.23.18    | WNK1     | chr12 | 996386    | 1006847   | N/A | N/A | 1 | 20.925 | N/A |
| NM_032156.8.4      | CAPRN2   | chr12 | 30881581  | 30888140  | N/A | N/A | 1 | 20.925 | N/A |
| NM_001244585.3.2   | LUC7L2   | chr7  | 139056132 | 139060902 | N/A | N/A | 1 | 20.925 | N/A |
| NM_018682.11.6     | KMT2E    | chr7  | 104714065 | 104719410 | N/A | N/A | 1 | 20.925 | N/A |
| NM_004286.4.2      | GTPBP1   | chr22 | 39104849  | 39113005  | N/A | N/A | 1 | 20.925 | N/A |
| NM_003900.5.3      | SQSTM1   | chr5  | 179250857 | 179252226 | N/A | N/A | 1 | 20.925 | N/A |
| NM_001076785.5.4   | SLC7A6   | chr16 | 68308593  | 68321774  | N/A | N/A | 1 | 20.925 | N/A |
| NM_004145.10.9     | MYO9B    | chr19 | 17273159  | 17273932  | N/A | N/A | 1 | 20.925 | N/A |
| NM_138962.11.3     | MSI2     | chr17 | 55334826  | 55729522  | N/A | N/A | 1 | 20.925 | N/A |
| NM_012197.13.2     | RABGAP1  | chr9  | 125719289 | 125782738 | N/A | N/A | 1 | 20.925 | N/A |
| NM_145177.3.2      | DHRX     | chrY  | 2276785   | 2293345   | N/A | N/A | 1 | 20.925 | N/A |
| NM_001164687.3.3   | THEMIS   | chr6  | 128150620 | 128151079 | N/A | N/A | 1 | 20.925 | N/A |
| NM_014801.17.10    | PCNX2    | chr1  | 233313547 | 233363117 | N/A | N/A | 1 | 20.925 | N/A |
| NM_024820.12.2     | DENND1A  | chr9  | 126345447 | 126641300 | N/A | N/A | 1 | 20.925 | N/A |
| NM_001135055.4.2   | TKT      | chr3  | 53274266  | 53276258  | N/A | N/A | 1 | 20.925 | N/A |
| NM_001178056.14.8  | PARP8    | chr5  | 50073902  | 50093067  | N/A | N/A | 1 | 20.925 | N/A |
| NM_138619.8.5      | GGA3     | chr17 | 73238416  | 73239651  | N/A | N/A | 1 | 20.925 | N/A |
| NM_000309.8.7      | PPOX     | chr1  | 161138782 | 161139510 | N/A | N/A | 1 | 20.925 | N/A |
| NM_018449.14.11    | UBAP2    | chr9  | 33944362  | 33956144  | N/A | N/A | 1 | 20.925 | N/A |
| NM_032221.5.2      | CHD6     | chr20 | 40141484  | 40179999  | N/A | N/A | 1 | 20.925 | N/A |
| NM_005845.13.5     | ABCC4    | chr13 | 95829960  | 95863035  | N/A | N/A | 1 | 20.925 | N/A |
| NM_001005751.13.12 | FAM21A   | chr10 | 51853027  | 51853677  | N/A | N/A | 1 | 20.925 | N/A |
| NM_018449.14.13    | UBAP2    | chr9  | 33944362  | 33948585  | N/A | N/A | 1 | 20.925 | N/A |
| NM_144604.8.8      | ZC3H18   | chr16 | 88677675  | 88677944  | N/A | N/A | 1 | 20.925 | N/A |
| NM_001243089.5.4   | FOXN1    | chr12 | 2975558   | 2977920   | N/A | N/A | 1 | 20.925 | N/A |
| NM_017890.31.22    | VPS13B   | chr8  | 100443764 | 100568881 | N/A | N/A | 1 | 20.925 | N/A |

|                    |         |       |           |           |     |     |   |        |     |
|--------------------|---------|-------|-----------|-----------|-----|-----|---|--------|-----|
| NM_002541.20.19    | OGDH    | chr7  | 44739739  | 44741214  | N/A | N/A | 1 | 20.925 | N/A |
| NM_001242599.11.6  | RBM39   | chr20 | 34300940  | 34313077  | N/A | N/A | 1 | 20.925 | N/A |
| NM_032341.8.6      | DDI2    | chr1  | 15970016  | 15978390  | N/A | N/A | 1 | 20.925 | N/A |
| NM_030934.7.2      | TRMT1L  | chr1  | 185112488 | 185121067 | N/A | N/A | 1 | 20.925 | N/A |
| NM_005109.11.2     | OXSRI   | chr3  | 38224493  | 38278452  | N/A | N/A | 1 | 20.925 | N/A |
| NM_032341.8.2      | DDI2    | chr1  | 15953163  | 15978390  | N/A | N/A | 1 | 20.925 | N/A |
| NM_012335.12.5     | MYO1F   | chr19 | 8612919   | 8618321   | N/A | N/A | 1 | 20.925 | N/A |
| NM_001077691.13.10 | ALG9    | chr11 | 111706887 | 111711532 | N/A | N/A | 1 | 20.925 | N/A |
| NR_047701.7.6      | -       | chr7  | 43679047  | 43680248  | N/A | N/A | 1 | 20.925 | N/A |
| NM_012426.21.19    | SF3B3   | chr16 | 70598967  | 70601439  | N/A | N/A | 1 | 20.925 | N/A |
| NM_031490.6.4      | LONP2   | chr16 | 48292528  | 48296783  | N/A | N/A | 1 | 20.925 | N/A |
| NM_024948.10.2     | FAM188A | chr10 | 15858833  | 15889942  | N/A | N/A | 1 | 20.925 | N/A |
| NM_014607.6.2      | UBXN4   | chr2  | 136505836 | 136519481 | N/A | N/A | 1 | 20.925 | N/A |
| NM_001003941.4.3   | OGDH    | chr7  | 44684925  | 44687358  | N/A | N/A | 1 | 20.925 | N/A |
| NM_020820.18.16    | PREX1   | chr20 | 47273577  | 47276599  | N/A | N/A | 1 | 20.925 | N/A |
| NM_032844.6.5      | MASTL   | chr10 | 27453992  | 27454468  | N/A | N/A | 1 | 20.925 | N/A |
| NM_030920.5.4      | ANP32E  | chr1  | 150198939 | 150201570 | N/A | N/A | 1 | 20.925 | N/A |
| NM_012287.15.14    | ACAP2   | chr3  | 195022303 | 195022903 | N/A | N/A | 1 | 20.925 | N/A |
| NM_001243403.20.20 | CLEC16A | chr16 | 11217598  | 11217803  | N/A | N/A | 1 | 20.925 | N/A |
| NM_001128610.7.4   | USP8    | chr15 | 50741596  | 50757388  | N/A | N/A | 1 | 20.925 | N/A |
| NM_001198810.14.8  | SLC43A1 | chr11 | 57254567  | 57261644  | N/A | N/A | 1 | 20.925 | N/A |
| NM_001144823.14.8  | DENND4A | chr15 | 66007815  | 66025156  | N/A | N/A | 1 | 20.925 | N/A |
| NM_002745.4.2      | MAPK1   | chr22 | 22153300  | 22162135  | N/A | N/A | 1 | 20.925 | N/A |
| NM_001130850.4.2   | CAB39   | chr2  | 231624673 | 231658046 | N/A | N/A | 1 | 20.925 | N/A |
| NM_001077352.4.3   | RBM23   | chr14 | 23375403  | 23378804  | N/A | N/A | 1 | 20.925 | N/A |
| NM_001278210.14.12 | NUP153  | chr6  | 17646297  | 17649531  | N/A | N/A | 1 | 20.925 | N/A |
| NM_033481.4.2      | FBXO9   | chr6  | 52935854  | 52941341  | N/A | N/A | 1 | 20.925 | N/A |
| NM_002154.15.8     | HSPA4   | chr5  | 132422473 | 132432978 | N/A | N/A | 1 | 20.925 | N/A |
| NM_001287061.8.6   | RABGEF1 | chr7  | 66262360  | 66270383  | N/A | N/A | 1 | 20.925 | N/A |
| NR_026644.4.2      | -       | chr13 | 99890680  | 99896878  | N/A | N/A | 1 | 20.925 | N/A |
| NM_005121.9.2      | MED13   | chr17 | 60087910  | 60140662  | N/A | N/A | 1 | 20.925 | N/A |
| NM_013438.5.2      | UBQLN1  | chr9  | 86293355  | 86301070  | N/A | N/A | 1 | 20.925 | N/A |
| NM_017566.5.2      | KLHDC4  | chr16 | 87782278  | 87795646  | N/A | N/A | 1 | 20.925 | N/A |

|                  |          |       |           |           |     |     |   |        |     |
|------------------|----------|-------|-----------|-----------|-----|-----|---|--------|-----|
| NM_017590.13.10  | ZC3H7B   | chr22 | 41735819  | 41739580  | N/A | N/A | 1 | 20.925 | N/A |
| NM_014810.8.4    | CEP350   | chr1  | 179959641 | 179975702 | N/A | N/A | 1 | 20.925 | N/A |
| NM_002577.12.11  | PAK2     | chr3  | 196541321 | 196545027 | N/A | N/A | 1 | 20.925 | N/A |
| NM_001278387.6.3 | SLC38A1  | chr12 | 46622935  | 46637097  | N/A | N/A | 1 | 20.925 | N/A |
| NM_001146216.3.2 | TACC1    | chr8  | 38646221  | 38678153  | N/A | N/A | 1 | 20.925 | N/A |
| NM_002432.4.2    | MNDA     | chr1  | 158811923 | 158813912 | N/A | N/A | 1 | 20.925 | N/A |
| NM_024524.29.21  | ATP13A3  | chr3  | 194146070 | 194152621 | N/A | N/A | 1 | 20.925 | N/A |
| NM_003601.16.15  | SMARCA5  | chr4  | 144464661 | 144465125 | N/A | N/A | 1 | 20.925 | N/A |
| NM_024605.9.5    | ARHGAP10 | chr4  | 148778703 | 148800489 | N/A | N/A | 1 | 20.925 | N/A |
| NM_175710.9.5    | CR1L     | chr1  | 207867697 | 207874963 | N/A | N/A | 1 | 20.925 | N/A |
| NR_073030.5.2    | -        | chr10 | 51606987  | 51613311  | N/A | N/A | 1 | 20.925 | N/A |
| NM_001142495.5.2 | MYO5A    | chr15 | 52708341  | 52725482  | N/A | N/A | 1 | 20.925 | N/A |
| NM_002504.17.16  | NFX1     | chr9  | 33351557  | 33352717  | N/A | N/A | 1 | 20.925 | N/A |
| NM_182540.8.3    | INTS6L   | chrX  | 134679347 | 134686071 | N/A | N/A | 1 | 20.925 | N/A |
| NM_004249.6.5    | RAB28    | chr4  | 13378168  | 13383218  | N/A | N/A | 1 | 20.925 | N/A |
| NM_014868.13.4   | RNF10    | chr12 | 120992520 | 121004783 | N/A | N/A | 1 | 20.925 | N/A |
| NM_000254.15.2   | MTR      | chr1  | 236966727 | 237001899 | N/A | N/A | 1 | 20.925 | N/A |
| NM_022039.4.2    | FBXW4    | chr10 | 103432671 | 103436193 | N/A | N/A | 1 | 20.925 | N/A |
| NM_001097615.3.2 | POLR2J3  | chr7  | 102208456 | 102210371 | N/A | N/A | 1 | 20.925 | N/A |
| NM_018027.21.19  | FRMD4A   | chr10 | 13701322  | 13705509  | N/A | N/A | 1 | 20.925 | N/A |
| NM_001876.10.8   | CPT1A    | chr11 | 68552282  | 68562379  | N/A | N/A | 1 | 20.925 | N/A |
| NM_144973.7.6    | DENND5B  | chr12 | 31595708  | 31600703  | N/A | N/A | 1 | 20.925 | N/A |
| NM_005499.5.2    | UBA2     | chr19 | 34921480  | 34925873  | N/A | N/A | 1 | 20.925 | N/A |
| NM_182751.5.4    | MCM10    | chr10 | 13214375  | 13214765  | N/A | N/A | 1 | 20.925 | N/A |
| NM_016377.6.2    | AKAP7    | chr6  | 131466424 | 131520713 | N/A | N/A | 1 | 20.925 | N/A |
| NM_007167.4.3    | ZMYM6    | chr1  | 35484953  | 35486068  | N/A | N/A | 1 | 20.925 | N/A |
| NM_004536.9.7    | NAIP     | chr5  | 70294550  | 70297970  | N/A | N/A | 1 | 20.925 | N/A |
| NM_175854.5.2    | PAN3     | chr13 | 28748408  | 28771483  | N/A | N/A | 1 | 20.925 | N/A |
| NM_001100164.6.6 | PHACTR2  | chr6  | 144086397 | 144086935 | N/A | N/A | 1 | 20.925 | N/A |
| NM_003400.11.8   | XPO1     | chr2  | 61722589  | 61726048  | N/A | N/A | 1 | 20.925 | N/A |
| NM_001005751.5.3 | FAM21A   | chr10 | 51829306  | 51840691  | N/A | N/A | 1 | 20.925 | N/A |
| NM_024605.19.15  | ARHGAP10 | chr4  | 148867767 | 148944564 | N/A | N/A | 1 | 20.925 | N/A |
| NM_001203249.8.4 | EZH2     | chr7  | 148523560 | 148529842 | N/A | N/A | 1 | 20.925 | N/A |

|                    |          |                 |           |           |     |     |   |        |     |
|--------------------|----------|-----------------|-----------|-----------|-----|-----|---|--------|-----|
| NM_001981.12.9     | EPS15    | chr1            | 51906018  | 51913807  | N/A | N/A | 1 | 20.925 | N/A |
| NM_004996.4.2      | ABCC1    | chr16           | 16101672  | 16108485  | N/A | N/A | 1 | 20.925 | N/A |
| NM_002463.5.2      | MX2      | chr21           | 42748762  | 42754491  | N/A | N/A | 1 | 20.925 | N/A |
| NM_001080480.3.2   | MBOAT1   | chr6            | 20151415  | 20153000  | N/A | N/A | 1 | 20.925 | N/A |
| NM_005085.30.28    | NUP214   | chr9            | 134070619 | 134077104 | N/A | N/A | 1 | 20.925 | N/A |
| NM_001013848.18.8  | EXOC6    | chr10           | 94679738  | 94733989  | N/A | N/A | 1 | 20.925 | N/A |
| NM_018639.6.3      | WSB2     | chr12           | 118474142 | 118481182 | N/A | N/A | 1 | 20.925 | N/A |
| NM_001166168.7.3   | NEK6     | chr9            | 127074787 | 127089724 | N/A | N/A | 1 | 20.925 | N/A |
| NM_152829.6.3      | TES      | chr7            | 115889073 | 115892530 | N/A | N/A | 1 | 20.925 | N/A |
| NM_152787.9.7      | TAB3     | chrX            | 30861082  | 30871055  | N/A | N/A | 1 | 20.925 | N/A |
| NM_001282751.9.4   | SUCO     | chr1            | 172525008 | 172539870 | N/A | N/A | 1 | 20.925 | N/A |
| NM_001145207.4.3   | HBS1L    | chr6            | 135360710 | 135363264 | N/A | N/A | 1 | 20.925 | N/A |
| NM_001136031.7.2   | ATG7     | chr3            | 11340159  | 11356967  | N/A | N/A | 1 | 20.925 | N/A |
| NM_015016.17.15    | MAST3    | chr19           | 18245388  | 18246651  | N/A | N/A | 1 | 20.925 | N/A |
| NM_000342.19.18    | SLC4A1   | chr17           | 42328526  | 42328956  | N/A | N/A | 1 | 20.925 | N/A |
| NM_000051.52.49    | ATM      | chr11           | 108199747 | 108202764 | N/A | N/A | 1 | 20.925 | N/A |
| NM_013385.8.7      | CYTH4    | chr22           | 37696947  | 37699443  | N/A | N/A | 1 | 20.925 | N/A |
| NM_001006607.7.3   | LRR37A2  | chr17_ctg5_hap1 | 212478    | 233157    | N/A | N/A | 1 | 20.925 | N/A |
| NM_001286206.13.12 | CEP162   | chr6            | 84894904  | 84896341  | N/A | N/A | 1 | 20.925 | N/A |
| NM_003704.13.12    | FAM193A  | chr4            | 2691232   | 2692697   | N/A | N/A | 1 | 20.925 | N/A |
| NM_022373.8.2      | HERPUD2  | chr7            | 35673921  | 35734237  | N/A | N/A | 1 | 20.925 | N/A |
| NM_198513.5.2      | PHF20L1  | chr8            | 133790041 | 133811106 | N/A | N/A | 1 | 20.925 | N/A |
| NR_034181.2.2      | -        | chr10           | 14938844  | 14939516  | N/A | N/A | 1 | 20.925 | N/A |
| NM_017858.6.5      | TIPIN    | chr15           | 66641397  | 66641775  | N/A | N/A | 1 | 20.925 | N/A |
| NM_001039476.4.2   | NPRL3    | chr16           | 160522    | 180590    | N/A | N/A | 1 | 20.925 | N/A |
| NM_001429.10.3     | EP300    | chr22           | 41521867  | 41537226  | N/A | N/A | 1 | 20.925 | N/A |
| NM_005426.13.13    | TP53BP2  | chr1            | 223985916 | 223986379 | N/A | N/A | 1 | 20.925 | N/A |
| NM_003126.35.34    | SPTA1    | chr1            | 158609371 | 158609797 | N/A | N/A | 1 | 20.925 | N/A |
| NM_006045.13.5     | ATP9A    | chr20           | 50286535  | 50314021  | N/A | N/A | 1 | 20.925 | N/A |
| NM_001139459.2.2   | CNST     | chr1            | 246754813 | 246755243 | N/A | N/A | 1 | 20.925 | N/A |
| NM_006031.15.14    | PCNT     | chr21           | 47783394  | 47787054  | N/A | N/A | 1 | 20.925 | N/A |
| NM_001005339.4.2   | RGS10    | chr10           | 121275020 | 121286936 | N/A | N/A | 1 | 20.925 | N/A |
| NM_015496.4.3      | KIAA1429 | chr8            | 95549330  | 95550574  | N/A | N/A | 1 | 20.925 | N/A |

|                    |            |       |           |           |     |     |   |        |     |
|--------------------|------------|-------|-----------|-----------|-----|-----|---|--------|-----|
| NM_004996.14.13    | ABCC1      | chr16 | 16162012  | 16165586  | N/A | N/A | 1 | 20.925 | N/A |
| NM_007007.8.3      | CPSF6      | chr12 | 69646830  | 69653977  | N/A | N/A | 1 | 20.925 | N/A |
| NR_046188.4.2      | -          | chr1  | 146066114 | 146074129 | N/A | N/A | 1 | 20.925 | N/A |
| NR_024548.5.4      | -          | chr7  | 65595730  | 65599361  | N/A | N/A | 1 | 20.925 | N/A |
| NR_033959.5.2      | -          | chr16 | 70253814  | 70256383  | N/A | N/A | 1 | 20.925 | N/A |
| NR_002824.7.4      | -          | chr15 | 23333848  | 23339028  | N/A | N/A | 1 | 20.925 | N/A |
| NM_005754.11.9     | G3BP1      | chr5  | 151179449 | 151180430 | N/A | N/A | 1 | 20.925 | N/A |
| NM_001105515.19.15 | ABCC4      | chr13 | 95813442  | 95818621  | N/A | N/A | 1 | 20.925 | N/A |
| NM_001195144.25.21 | AC013264.1 | chr2  | 197863060 | 197870634 | N/A | N/A | 1 | 20.925 | N/A |
| NM_018416.2.2      | FOXJ2      | chr12 | 8192414   | 8192761   | N/A | N/A | 1 | 20.925 | N/A |
| NM_001199398.11.6  | NEK1       | chr4  | 170501992 | 170511960 | N/A | N/A | 1 | 20.925 | N/A |
| NM_001243835.9.7   | STAT4      | chr2  | 191927487 | 191931241 | N/A | N/A | 1 | 20.925 | N/A |
| NM_019043.8.5      | APBB1IP    | chr10 | 26789747  | 26802589  | N/A | N/A | 1 | 20.925 | N/A |
| NM_002035.9.2      | KDSR       | chr18 | 61002489  | 61030101  | N/A | N/A | 1 | 20.925 | N/A |
| NM_004774.13.11    | MED1       | chr17 | 37579579  | 37580991  | N/A | N/A | 1 | 20.925 | N/A |
| NM_007282.9.6      | RNF13      | chr3  | 149613259 | 149639014 | N/A | N/A | 1 | 20.925 | N/A |
| NM_004941.16.10    | DHX8       | chr17 | 41576229  | 41585888  | N/A | N/A | 1 | 20.925 | N/A |
| NM_018291.5.2      | FGGY       | chr1  | 59787207  | 59844509  | N/A | N/A | 1 | 20.925 | N/A |
| NM_003105.32.24    | SORL1      | chr11 | 121444949 | 121466481 | N/A | N/A | 1 | 20.925 | N/A |
| NM_014616.24.22    | ATP11B     | chr3  | 182602540 | 182605501 | N/A | N/A | 1 | 20.925 | N/A |
| NM_015171.23.22    | XPO6       | chr16 | 28112778  | 28113266  | N/A | N/A | 1 | 20.925 | N/A |
| NM_006098.4.2      | RACK1      | chr5  | 180666486 | 180669345 | N/A | N/A | 1 | 20.925 | N/A |
| NM_001267727.2.2   | ARSG       | chr17 | 66303083  | 66303852  | N/A | N/A | 1 | 20.925 | N/A |
| NM_015113.35.29    | ZZEF1      | chr17 | 3955264   | 3968123   | N/A | N/A | 1 | 20.925 | N/A |
| NM_001206999.22.20 | CIT        | chr12 | 120195174 | 120198859 | N/A | N/A | 1 | 20.925 | N/A |
| NM_001253699.7.5   | ERBIN      | chr5  | 65307876  | 65310553  | N/A | N/A | 1 | 20.925 | N/A |
| NM_004724.11.6     | ZW10       | chr11 | 113612415 | 113629428 | N/A | N/A | 1 | 20.925 | N/A |
| NM_020245.5.4      | TULP4      | chr6  | 158870027 | 158873300 | N/A | N/A | 1 | 20.925 | N/A |
| NM_020165.7.3      | RAD18      | chr3  | 8977554   | 8990254   | N/A | N/A | 1 | 20.925 | N/A |
| NM_198097.8.5      | CCZ1B      | chr7  | 6854394   | 6862991   | N/A | N/A | 1 | 20.925 | N/A |
| NM_173545.8.2      | APLF       | chr2  | 68717321  | 68772444  | N/A | N/A | 1 | 20.925 | N/A |
| NM_005829.3.2      | AP3S2      | chr15 | 90431752  | 90432372  | N/A | N/A | 1 | 20.925 | N/A |
| NM_019004.10.6     | ANKIB1     | chr7  | 91972337  | 91991587  | N/A | N/A | 1 | 20.925 | N/A |

|                    |         |       |           |           |     |     |   |        |     |
|--------------------|---------|-------|-----------|-----------|-----|-----|---|--------|-----|
| NR_026665.3.2      | -       | chr1  | 117078586 | 117087226 | N/A | N/A | 1 | 20.925 | N/A |
| NM_001134415.7.3   | TBCCD1  | chr3  | 186268917 | 186276361 | N/A | N/A | 1 | 20.925 | N/A |
| NM_004810.7.2      | GRAP2   | chr22 | 40343096  | 40365537  | N/A | N/A | 1 | 20.925 | N/A |
| NM_024887.8.6      | DHDDS   | chr1  | 26774049  | 26786635  | N/A | N/A | 1 | 20.925 | N/A |
| NM_018023.19.18    | YEATS2  | chr3  | 183493702 | 183495488 | N/A | N/A | 1 | 20.925 | N/A |
| NM_138443.6.3      | HAUS1   | chr18 | 43698146  | 43703330  | N/A | N/A | 1 | 20.925 | N/A |
| NM_004068.4.3      | AP2M1   | chr3  | 183896644 | 183898039 | N/A | N/A | 1 | 20.925 | N/A |
| NM_001199261.7.4   | UCHL5   | chr1  | 192997214 | 192998787 | N/A | N/A | 1 | 20.925 | N/A |
| NM_001243249.9.8   | NPRL3   | chr16 | 142593    | 143323    | N/A | N/A | 1 | 20.925 | N/A |
| NM_018429.35.29    | BDP1    | chr5  | 70837280  | 70849147  | N/A | N/A | 1 | 20.925 | N/A |
| NM_014223.6.2      | NFYC    | chr1  | 41204507  | 41223966  | N/A | N/A | 1 | 20.925 | N/A |
| NM_001144884.8.3   | SLC30A7 | chr1  | 101372407 | 101387397 | N/A | N/A | 1 | 20.925 | N/A |
| NM_006260.9.5      | DNAJC3  | chr13 | 96409897  | 96416207  | N/A | N/A | 1 | 20.925 | N/A |
| NM_032295.7.6      | SLC37A3 | chr7  | 140055467 | 140058585 | N/A | N/A | 1 | 20.925 | N/A |
| NM_015092.49.39    | SMG1    | chr16 | 18846213  | 18856973  | N/A | N/A | 1 | 20.925 | N/A |
| NM_017757.6.4      | ZNF407  | chr18 | 72589152  | 72601994  | N/A | N/A | 1 | 20.925 | N/A |
| NM_001204387.13.8  | DLG1    | chr3  | 196807921 | 196846401 | N/A | N/A | 1 | 20.925 | N/A |
| NM_005505.7.2      | SCARB1  | chr12 | 125292306 | 125302253 | N/A | N/A | 1 | 20.925 | N/A |
| NM_017990.9.7      | PDPR    | chr16 | 70164325  | 70166203  | N/A | N/A | 1 | 20.925 | N/A |
| NM_006437.15.13    | PARP4   | chr13 | 25049609  | 25052414  | N/A | N/A | 1 | 20.925 | N/A |
| NM_014802.14.10    | C2CD5   | chr12 | 22635490  | 22659753  | N/A | N/A | 1 | 20.925 | N/A |
| NM_015020.13.6     | PHLPP2  | chr16 | 71697801  | 71715808  | N/A | N/A | 1 | 20.925 | N/A |
| NM_001134938.10.8  | FIP1L1  | chr4  | 54265896  | 54294350  | N/A | N/A | 1 | 20.925 | N/A |
| NM_001203246.9.6   | GPBP1   | chr5  | 56542126  | 56546968  | N/A | N/A | 1 | 20.925 | N/A |
| NM_015531.22.16    | C2CD3   | chr11 | 73795925  | 73809300  | N/A | N/A | 1 | 20.925 | N/A |
| NM_002519.12.9     | NPAT    | chr11 | 108046972 | 108056221 | N/A | N/A | 1 | 20.925 | N/A |
| NM_001271.37.33    | CHD2    | chr15 | 93545406  | 93558139  | N/A | N/A | 1 | 20.925 | N/A |
| NM_014972.12.8     | TCF25   | chr16 | 89961445  | 89967202  | N/A | N/A | 1 | 20.925 | N/A |
| NM_014972.12.9     | TCF25   | chr16 | 89962397  | 89967202  | N/A | N/A | 1 | 20.925 | N/A |
| NM_016551.9.6      | TM7SF3  | chr12 | 27132716  | 27143560  | N/A | N/A | 1 | 20.925 | N/A |
| NM_001083953.29.29 | THADA   | chr2  | 43625109  | 43625278  | N/A | N/A | 1 | 20.925 | N/A |
| NM_020751.18.14    | COG6    | chr13 | 40293372  | 40301685  | N/A | N/A | 1 | 20.925 | N/A |
| NM_001206946.7.2   | PICALM  | chr11 | 85722072  | 85742653  | N/A | N/A | 1 | 20.925 | N/A |



|                    |         |       |           |           |     |     |   |        |     |
|--------------------|---------|-------|-----------|-----------|-----|-----|---|--------|-----|
| NM_001134338.4.2   | RNF24   | chr20 | 3928883   | 3955047   | N/A | N/A | 1 | 20.925 | N/A |
| NM_001012515.4.2   | FECH    | chr18 | 55238623  | 55247431  | N/A | N/A | 1 | 20.925 | N/A |
| NM_005422.19.18    | TECTA   | chr11 | 121038762 | 121039634 | N/A | N/A | 1 | 20.925 | N/A |
| NM_001198957.15.12 | DCAF6   | chr1  | 168007608 | 168014465 | N/A | N/A | 1 | 20.925 | N/A |
| NM_001163286.5.3   | EWSR1   | chr22 | 29668368  | 29674205  | N/A | N/A | 1 | 20.925 | N/A |
| NM_015331.15.11    | NCSTN   | chr1  | 160323907 | 160326544 | N/A | N/A | 1 | 20.925 | N/A |
| NM_001081573.8.5   | GAB3    | chrX  | 153924191 | 153928334 | N/A | N/A | 1 | 20.925 | N/A |
| NM_203346.24.21    | HDLBP   | chr2  | 242173234 | 242176184 | N/A | N/A | 1 | 20.925 | N/A |
| NM_001204426.9.5   | LIMK1   | chr7  | 73520204  | 73523366  | N/A | N/A | 1 | 20.925 | N/A |
| NM_015382.40.31    | HECTD1  | chr14 | 31574588  | 31583546  | N/A | N/A | 1 | 20.925 | N/A |
| NR_026999.10.8     | -       | chr7  | 39822333  | 39829143  | N/A | N/A | 1 | 20.925 | N/A |
| NM_016604.11.8     | KDM3B   | chr5  | 137726701 | 137735701 | N/A | N/A | 1 | 20.925 | N/A |
| NM_005121.16.16    | MED13   | chr17 | 60059558  | 60060475  | N/A | N/A | 1 | 20.925 | N/A |
| NM_015555.13.11    | ZNF451  | chr6  | 57017018  | 57025950  | N/A | N/A | 1 | 20.925 | N/A |
| NM_007124.13.10    | UTRN    | chr6  | 144758700 | 144765518 | N/A | N/A | 1 | 20.925 | N/A |
| NM_001605.14.8     | AARS    | chr16 | 70292882  | 70302282  | N/A | N/A | 1 | 20.925 | N/A |
| NM_005124.11.3     | NUP153  | chr6  | 17661883  | 17676001  | N/A | N/A | 1 | 20.925 | N/A |
| NM_173647.3.2      | RNF149  | chr2  | 101910475 | 101911643 | N/A | N/A | 1 | 20.925 | N/A |
| NM_004800.9.5      | TM9SF2  | chr13 | 100188861 | 100193921 | N/A | N/A | 1 | 20.925 | N/A |
| NM_033656.15.13    | BRWD1   | chr21 | 40641824  | 40646398  | N/A | N/A | 1 | 20.925 | N/A |
| NM_198433.8.5      | AURKA   | chr20 | 54956488  | 54961589  | N/A | N/A | 1 | 20.925 | N/A |
| NM_005761.9.6      | PLXNC1  | chr12 | 94613791  | 94621011  | N/A | N/A | 1 | 20.925 | N/A |
| NM_001282560.10.7  | EYA3    | chr1  | 28330846  | 28343750  | N/A | N/A | 1 | 20.925 | N/A |
| NM_006243.3.2      | PPP2R5A | chr1  | 212502476 | 212506940 | N/A | N/A | 1 | 20.925 | N/A |
| NM_012398.6.4      | PIP5K1C | chr19 | 3656402   | 3661999   | N/A | N/A | 1 | 20.925 | N/A |
| NM_001257990.7.2   | FBXO7   | chr22 | 32874967  | 32889268  | N/A | N/A | 1 | 20.925 | N/A |
| NM_000181.5.2      | GUSB    | chr7  | 65441001  | 65445396  | N/A | N/A | 1 | 20.925 | N/A |
| NR_036627.14.10    | -       | chr3  | 50144199  | 50147121  | N/A | N/A | 1 | 20.925 | N/A |
| NM_024956.10.6     | TMEM62  | chr15 | 43440952  | 43452992  | N/A | N/A | 1 | 20.925 | N/A |
| NM_016447.6.3      | MPP6    | chr7  | 24663284  | 24690331  | N/A | N/A | 1 | 20.925 | N/A |
| NM_020246.7.5      | SLC12A9 | chr7  | 100454489 | 100456783 | N/A | N/A | 1 | 20.925 | N/A |
| NM_016334.10.8     | GPR89B  | chr1  | 147438785 | 147442191 | N/A | N/A | 1 | 20.925 | N/A |
| NM_005993.35.34    | TBCD    | chr17 | 80890533  | 80895236  | N/A | N/A | 1 | 20.925 | N/A |

|                    |          |       |           |           |     |     |   |        |     |
|--------------------|----------|-------|-----------|-----------|-----|-----|---|--------|-----|
| NM_133645.9.8      | MTO1     | chr6  | 74190397  | 74191967  | N/A | N/A | 1 | 20.925 | N/A |
| NM_001271.7.3      | CHD2     | chr15 | 93467550  | 93482948  | N/A | N/A | 1 | 20.925 | N/A |
| NM_001097616.5.3   | -        | chr1  | 145897084 | 145900490 | N/A | N/A | 1 | 20.925 | N/A |
| NM_001433.7.4      | ERN1     | chr17 | 62145549  | 62157094  | N/A | N/A | 1 | 20.925 | N/A |
| NM_206921.5.3      | CEP85L   | chr6  | 118832460 | 118887479 | N/A | N/A | 1 | 20.925 | N/A |
| NM_000520.7.2      | HEXA     | chr15 | 72642858  | 72648958  | N/A | N/A | 1 | 20.925 | N/A |
| NR_024075.13.8     | -        | chr19 | 6960307   | 6974685   | N/A | N/A | 1 | 20.925 | N/A |
| NM_017772.7.3      | TBC1D22B | chr6  | 37247079  | 37254848  | N/A | N/A | 1 | 20.925 | N/A |
| NM_001282604.6.3   | PTGES3   | chr12 | 57064058  | 57066849  | N/A | N/A | 1 | 20.925 | N/A |
| NM_152564.30.24    | VPS13B   | chr8  | 100479641 | 100533238 | N/A | N/A | 1 | 20.925 | N/A |
| NM_001170464.3.2   | CDK17    | chr12 | 96717725  | 96728643  | N/A | N/A | 1 | 20.925 | N/A |
| NM_015030.3.2      | FRYL     | chr4  | 48686689  | 48712715  | N/A | N/A | 1 | 20.925 | N/A |
| NM_000922.5.3      | PDE3B    | chr11 | 14807982  | 14825596  | N/A | N/A | 1 | 20.925 | N/A |
| NM_152892.3.2      | LRWD1    | chr7  | 102106263 | 102106717 | N/A | N/A | 1 | 20.925 | N/A |
| NM_001271594.7.2   | SESN3    | chr11 | 94910882  | 94926686  | N/A | N/A | 1 | 20.925 | N/A |
| NM_001282752.12.10 | PUM2     | chr2  | 20478343  | 20483247  | N/A | N/A | 1 | 20.925 | N/A |
| NM_015171.5.2      | XPO6     | chr16 | 28181070  | 28192352  | N/A | N/A | 1 | 20.925 | N/A |
| NM_170606.31.27    | KMT2C    | chr7  | 151891093 | 151896544 | N/A | N/A | 1 | 20.925 | N/A |
| NM_020201.4.2      | NT5M     | chr17 | 17209856  | 17248222  | N/A | N/A | 1 | 20.925 | N/A |
| NM_000107.7.4      | DDB2     | chr11 | 47254364  | 47256963  | N/A | N/A | 1 | 20.925 | N/A |
| NM_015164.6.4      | PLEKHM2  | chr1  | 16044387  | 16046415  | N/A | N/A | 1 | 20.925 | N/A |
| NM_001289030.8.5   | GALK2    | chr15 | 49528047  | 49575915  | N/A | N/A | 1 | 20.925 | N/A |
| NM_001278617.19.10 | BUB1     | chr2  | 111406810 | 111419418 | N/A | N/A | 1 | 20.925 | N/A |
| NM_006934.7.5      | SLC6A9   | chr1  | 44467984  | 44468657  | N/A | N/A | 1 | 20.925 | N/A |
| NM_003234.18.2     | TFRC     | chr3  | 195780288 | 195803993 | N/A | N/A | 1 | 20.925 | N/A |
| NM_024821.6.2      | CCDC134  | chr22 | 42204878  | 42209826  | N/A | N/A | 1 | 20.925 | N/A |
| NM_014547.7.4      | TMOD3    | chr15 | 52179785  | 52188723  | N/A | N/A | 1 | 20.925 | N/A |
| NM_005156.6.3      | PTBP3    | chr9  | 115024714 | 115060196 | N/A | N/A | 1 | 20.925 | N/A |
| NM_014451.17.14    | BBS9     | chr7  | 33397466  | 33427756  | N/A | N/A | 1 | 20.925 | N/A |
| NM_001159643.3.1   | MCTP2    | chr15 | 94841429  | 94858866  | N/A | N/A | 1 | 20.925 | N/A |
| NM_007269.17.12    | STXBP3   | chr1  | 109336203 | 109342927 | N/A | N/A | 1 | 20.925 | N/A |
| NM_001171805.7.2   | PAPD7    | chr5  | 6737622   | 6746540   | N/A | N/A | 1 | 20.925 | N/A |
| NM_017635.3.2      | KMT5B    | chr11 | 67953247  | 67957619  | N/A | N/A | 1 | 20.925 | N/A |

|                    |          |                |           |           |     |     |   |        |     |
|--------------------|----------|----------------|-----------|-----------|-----|-----|---|--------|-----|
| NM_001286457.10.7  | USP7     | chr16          | 9009110   | 9011013   | N/A | N/A | 1 | 20.925 | N/A |
| NM_001135024.5.3   | PDHX     | chr11          | 34969052  | 34982065  | N/A | N/A | 1 | 20.925 | N/A |
| NM_001744.7.2      | CAMK4    | chr5           | 110679721 | 110784901 | N/A | N/A | 1 | 20.925 | N/A |
| NM_033121.12.7     | ANKRD13A | chr12          | 110461850 | 110468563 | N/A | N/A | 1 | 20.925 | N/A |
| NM_001271886.5.2   | AAGAB    | chr15          | 67524151  | 67529158  | N/A | N/A | 1 | 20.925 | N/A |
| NM_002370.3.2      | MAGOH    | chr1           | 53699213  | 53701307  | N/A | N/A | 1 | 20.925 | N/A |
| NM_004384.3.1      | CSNK1G3  | chr5           | 122881110 | 122893258 | N/A | N/A | 1 | 20.925 | N/A |
| NM_006540.4.3      | NCOA2    | chr8           | 71126137  | 71128999  | N/A | N/A | 1 | 20.925 | N/A |
| NM_175861.5.3      | TMTC1    | chr12          | 29904598  | 29911710  | N/A | N/A | 1 | 20.925 | N/A |
| NM_032290.4.2      | SLF1     | chr5           | 93964515  | 93966448  | N/A | N/A | 1 | 20.925 | N/A |
| NM_014574.14.11    | STRN3    | chr14          | 31371741  | 31380368  | N/A | N/A | 1 | 20.925 | N/A |
| NM_004371.7.4      | COPA     | chr1           | 160295332 | 160305112 | N/A | N/A | 1 | 20.925 | N/A |
| NM_001144772.16.13 | NSMAF    | chr8           | 59513843  | 59515945  | N/A | N/A | 1 | 20.925 | N/A |
| NM_173582.12.10    | PGM2L1   | chr11          | 74053505  | 74054461  | N/A | N/A | 1 | 20.925 | N/A |
| NM_016589.6.2      | TIMMDC1  | chr3           | 119219541 | 119236162 | N/A | N/A | 1 | 20.925 | N/A |
| NM_003061.25.23    | SLIT1    | chr10          | 98790513  | 98794299  | N/A | N/A | 1 | 20.925 | N/A |
| NM_138799.6.2      | MBOAT2   | chr2           | 9022640   | 9098771   | N/A | N/A | 1 | 20.925 | N/A |
| NM_002830.15.12    | PTPN4    | chr2           | 120677644 | 120692534 | N/A | N/A | 1 | 20.925 | N/A |
| NM_014184.4.3      | CNIH4    | chr1           | 224553580 | 224559125 | N/A | N/A | 1 | 20.925 | N/A |
| NM_014960.9.7      | ARSG     | chr17          | 66364688  | 66381313  | N/A | N/A | 1 | 20.925 | N/A |
| NM_014456.8.3      | PDCD4    | chr10          | 112640990 | 112650428 | N/A | N/A | 1 | 20.925 | N/A |
| NM_001271769.22.12 | AP3B1    | chr5           | 77385216  | 77461496  | N/A | N/A | 1 | 20.925 | N/A |
| NM_020234.5.3      | DTWD1    | chr15          | 49917309  | 49926991  | N/A | N/A | 1 | 20.925 | N/A |
| NM_003400.4.3      | XPO1     | chr2           | 61749745  | 61753656  | N/A | N/A | 1 | 20.925 | N/A |
| NM_032590.11.11    | KDM2B    | chr12          | 121947369 | 121947842 | N/A | N/A | 1 | 20.925 | N/A |
| NM_001277140.6.2   | ACTR3    | chr2           | 114670748 | 114691963 | N/A | N/A | 1 | 20.925 | N/A |
| NM_001109938.4.3   | C6orf136 | chr6_ssto_hap7 | 1951050   | 1951523   | N/A | N/A | 1 | 20.925 | N/A |
| NM_001161726.12.11 | PPP2R5C  | chr14          | 102368055 | 102372866 | N/A | N/A | 1 | 20.925 | N/A |
| NM_020210.8.5      | SEMA4B   | chr15          | 90763024  | 90764997  | N/A | N/A | 1 | 20.925 | N/A |
| NM_001080475.3.2   | PLEKHM3  | chr2           | 208841374 | 208866681 | N/A | N/A | 1 | 20.925 | N/A |
| NM_023072.9.7      | ZSWIM4   | chr19          | 13928029  | 13930306  | N/A | N/A | 1 | 20.925 | N/A |
| NM_001113512.5.4   | ARHGEF7  | chr13          | 111870025 | 111885640 | N/A | N/A | 1 | 20.925 | N/A |
| NM_014671.10.3     | UBE3C    | chr7           | 156961741 | 156979715 | N/A | N/A | 1 | 20.925 | N/A |

|                    |          |       |           |           |     |     |   |        |     |
|--------------------|----------|-------|-----------|-----------|-----|-----|---|--------|-----|
| NR_037659.10.4     | -        | chr12 | 89853414  | 89866052  | N/A | N/A | 1 | 20.925 | N/A |
| NM_015115.5.2      | DCUN1D4  | chr4  | 52729602  | 52744020  | N/A | N/A | 1 | 20.925 | N/A |
| NM_019004.9.2      | ANKIB1   | chr7  | 91924202  | 91981956  | N/A | N/A | 1 | 20.925 | N/A |
| NM_001145044.7.5   | SLCO3A1  | chr15 | 92663694  | 92671719  | N/A | N/A | 1 | 20.925 | N/A |
| NM_001042683.29.26 | SHPRH    | chr6  | 146209155 | 146216113 | N/A | N/A | 1 | 20.925 | N/A |
| NM_019004.9.6      | ANKIB1   | chr7  | 91972337  | 91981956  | N/A | N/A | 1 | 20.925 | N/A |
| NM_015482.9.5      | SLC22A23 | chr6  | 3284085   | 3298452   | N/A | N/A | 1 | 20.925 | N/A |
| NM_014247.7.4      | RAPGEF2  | chr4  | 160243498 | 160251650 | N/A | N/A | 1 | 20.925 | N/A |
| NM_014423.13.12    | AFF4     | chr5  | 132227855 | 132228810 | N/A | N/A | 1 | 20.925 | N/A |
| NM_030768.9.2      | ILKAP    | chr2  | 239090705 | 239103511 | N/A | N/A | 1 | 20.925 | N/A |
| NM_001280539.3.3   | RNF19A   | chr8  | 101299728 | 101300495 | N/A | N/A | 1 | 20.925 | N/A |
| NM_145726.9.2      | TRAF3    | chr14 | 103296670 | 103363738 | N/A | N/A | 1 | 20.925 | N/A |
| NM_021627.16.4     | SENP2    | chr3  | 185316745 | 185344181 | N/A | N/A | 1 | 20.925 | N/A |
| NM_001247996.13.9  | ASAP1    | chr8  | 131172109 | 131193126 | N/A | N/A | 1 | 20.925 | N/A |
| NM_001265612.12.9  | CNOT1    | chr16 | 58614536  | 58617086  | N/A | N/A | 1 | 20.925 | N/A |
| NM_018312.3.2      | PPP6R3   | chr11 | 68272612  | 68287119  | N/A | N/A | 1 | 20.925 | N/A |
| NM_001037283.6.2   | EIF3B    | chr7  | 2400344   | 2404164   | N/A | N/A | 1 | 20.925 | N/A |
| NM_021249.8.2      | SNX6     | chr14 | 35055435  | 35078948  | N/A | N/A | 1 | 20.925 | N/A |
| NM_024763.4.2      | WDR78    | chr1  | 67356836  | 67371058  | N/A | N/A | 1 | 20.925 | N/A |
| NM_001025160.12.11 | ADGRE5   | chr19 | 14513408  | 14515374  | N/A | N/A | 1 | 20.925 | N/A |
| NM_001040451.5.3   | RUFY1    | chr5  | 178994461 | 179004137 | N/A | N/A | 1 | 20.925 | N/A |
| NM_005637.9.4      | SS18     | chr18 | 23612362  | 23637706  | N/A | N/A | 1 | 20.925 | N/A |
| NM_006303.3.2      | AIMP2    | chr7  | 6054776   | 6057676   | N/A | N/A | 1 | 20.925 | N/A |
| NM_020410.24.15    | ATP13A1  | chr19 | 19756682  | 19764703  | N/A | N/A | 1 | 20.925 | N/A |
| NM_001172746.18.14 | SEC23B   | chr20 | 18523662  | 18535034  | N/A | N/A | 1 | 20.925 | N/A |
| NM_001007188.5.3   | DEPDC5   | chr22 | 32154531  | 32161046  | N/A | N/A | 1 | 20.925 | N/A |
| NM_001243689.8.2   | LETMD1   | chr12 | 51442816  | 51451911  | N/A | N/A | 1 | 20.925 | N/A |
| NM_001251922.6.3   | RAP1B    | chr12 | 69044179  | 69050997  | N/A | N/A | 1 | 20.925 | N/A |
| NM_003400.23.18    | XPO1     | chr2  | 61709514  | 61715906  | N/A | N/A | 1 | 20.925 | N/A |
| NM_015168.11.3     | ZC3H4    | chr19 | 47584769  | 47597865  | N/A | N/A | 1 | 20.925 | N/A |
| NM_003907.7.6      | EIF2B5   | chr3  | 183857867 | 183858518 | N/A | N/A | 1 | 20.925 | N/A |
| NM_001273.33.31    | CHD4     | chr12 | 6690209   | 6690980   | N/A | N/A | 1 | 20.925 | N/A |
| NM_002372.12.5     | MAN2A1   | chr5  | 109091029 | 109125228 | N/A | N/A | 1 | 20.925 | N/A |

|                    |          |       |           |           |     |     |   |        |     |
|--------------------|----------|-------|-----------|-----------|-----|-----|---|--------|-----|
| NM_020935.10.3     | USP37    | chr2  | 219394678 | 219425606 | N/A | N/A | 1 | 20.925 | N/A |
| NM_005188.11.10    | CBL      | chr11 | 119155678 | 119156276 | N/A | N/A | 1 | 20.925 | N/A |
| NM_018440.3.2      | PAG1     | chr8  | 81942230  | 81982405  | N/A | N/A | 1 | 20.925 | N/A |
| NM_138353.6.4      | DCAF15   | chr19 | 14066723  | 14067334  | N/A | N/A | 1 | 20.925 | N/A |
| NM_020820.29.17    | PREX1    | chr20 | 47258705  | 47274766  | N/A | N/A | 1 | 20.925 | N/A |
| NR_073598.8.4      | -        | chr15 | 50303041  | 50339661  | N/A | N/A | 1 | 20.925 | N/A |
| NM_001031847.14.9  | CPT1A    | chr11 | 68540732  | 68560870  | N/A | N/A | 1 | 20.925 | N/A |
| NM_020754.11.4     | ARHGAP31 | chr3  | 119099750 | 119128623 | N/A | N/A | 1 | 20.925 | N/A |
| NM_015040.7.2      | PIKFYVE  | chr2  | 209136234 | 209153542 | N/A | N/A | 1 | 20.925 | N/A |
| NM_052937.2.2      | PCMTD1   | chr8  | 52773404  | 52773806  | N/A | N/A | 1 | 20.925 | N/A |
| NM_020120.3.2      | UGGT1    | chr2  | 128855002 | 128861588 | N/A | N/A | 1 | 20.925 | N/A |
| NM_014716.10.6     | ACAP1    | chr17 | 7246697   | 7247967   | N/A | N/A | 1 | 20.925 | N/A |
| NM_006322.19.12    | TUBGCP3  | chr13 | 113158345 | 113181798 | N/A | N/A | 1 | 20.925 | N/A |
| NM_015288.4.2      | JADE2    | chr5  | 133871547 | 133887899 | N/A | N/A | 1 | 20.925 | N/A |
| NM_004996.7.5      | ABCC1    | chr16 | 16110352  | 16130460  | N/A | N/A | 1 | 20.925 | N/A |
| NM_014629.11.8     | ARHGEF10 | chr8  | 1824736   | 1833873   | N/A | N/A | 1 | 20.925 | N/A |
| NM_001287054.5.2   | ZKSCAN1  | chr7  | 99616853  | 99621930  | N/A | N/A | 1 | 20.925 | N/A |
| NR_036464.10.2     | -        | chr4  | 15626874  | 15646331  | N/A | N/A | 1 | 20.925 | N/A |
| NM_001286792.6.5   | SPATA13  | chr13 | 24823614  | 24826000  | N/A | N/A | 1 | 20.925 | N/A |
| NM_017774.9.8      | CDKAL1   | chr6  | 20781375  | 20846409  | N/A | N/A | 1 | 20.925 | N/A |
| NM_017774.9.6      | CDKAL1   | chr6  | 20739749  | 20846409  | N/A | N/A | 1 | 20.925 | N/A |
| NM_007368.22.19    | RASA3    | chr13 | 114757960 | 114766408 | N/A | N/A | 1 | 20.925 | N/A |
| NM_001286277.17.12 | TUBGCP3  | chr13 | 113170753 | 113181798 | N/A | N/A | 1 | 20.925 | N/A |
| NM_001287060.9.9   | RABGEF1  | chr7  | 66270126  | 66270383  | N/A | N/A | 1 | 20.925 | N/A |
| NM_001253697.4.2   | ERBIN    | chr5  | 65284462  | 65290692  | N/A | N/A | 1 | 20.925 | N/A |
| NM_033657.6.4      | DAP3     | chr1  | 155691307 | 155695810 | N/A | N/A | 1 | 20.925 | N/A |
| NM_033657.6.5      | DAP3     | chr1  | 155695172 | 155695810 | N/A | N/A | 1 | 20.925 | N/A |
| NM_001284226.13.7  | ELP3     | chr8  | 27987018  | 28019595  | N/A | N/A | 1 | 20.925 | N/A |
| NM_020830.10.7     | WDFY1    | chr2  | 224746658 | 224760347 | N/A | N/A | 1 | 20.925 | N/A |
| NM_003411.3.2      | ZFY      | chrY  | 2821949   | 2829687   | N/A | N/A | 1 | 20.925 | N/A |
| NM_001605.9.8      | AARS     | chr16 | 70301561  | 70302282  | N/A | N/A | 1 | 20.925 | N/A |
| NM_181701.4.2      | QSOX2    | chr9  | 139115852 | 139118720 | N/A | N/A | 1 | 20.925 | N/A |
| NR_024019.5.3      | -        | chr5  | 176963358 | 176966148 | N/A | N/A | 1 | 20.925 | N/A |

|                    |          |       |           |           |     |     |   |        |     |
|--------------------|----------|-------|-----------|-----------|-----|-----|---|--------|-----|
| NM_032213.6.5      | ELMOD3   | chr2  | 85595808  | 85596953  | N/A | N/A | 1 | 20.925 | N/A |
| NM_001243137.18.14 | PDE8A    | chr15 | 85657103  | 85664245  | N/A | N/A | 1 | 20.925 | N/A |
| NM_000918.4.3      | P4HB     | chr17 | 79813017  | 79813462  | N/A | N/A | 1 | 20.925 | N/A |
| NM_173630.39.35    | RTTN     | chr18 | 67718646  | 67733158  | N/A | N/A | 1 | 20.925 | N/A |
| NM_003184.22.19    | TAF2     | chr8  | 120768245 | 120774848 | N/A | N/A | 1 | 20.925 | N/A |
| NM_014801.15.13    | PCNX2    | chr1  | 233334684 | 233344435 | N/A | N/A | 1 | 20.925 | N/A |
| NM_152233.6.3      | SNX6     | chr14 | 35072553  | 35078948  | N/A | N/A | 1 | 20.925 | N/A |
| NM_015295.28.25    | SMCHD1   | chr18 | 2732262   | 2740819   | N/A | N/A | 1 | 20.925 | N/A |
| NM_001003652.6.3   | SMAD2    | chr18 | 45391429  | 45396935  | N/A | N/A | 1 | 20.925 | N/A |
| NM_012096.10.7     | APPL1    | chr3  | 57276883  | 57282379  | N/A | N/A | 1 | 20.925 | N/A |
| NM_001008938.16.14 | CKAP5    | chr11 | 46810230  | 46812133  | N/A | N/A | 1 | 20.925 | N/A |
| NM_014868.3.2      | RNF10    | chr12 | 120984207 | 120990501 | N/A | N/A | 1 | 20.925 | N/A |
| NM_017653.8.4      | DYM      | chr18 | 46858233  | 46906128  | N/A | N/A | 1 | 20.925 | N/A |
| NM_014810.17.16    | CEP350   | chr1  | 180002996 | 180006224 | N/A | N/A | 1 | 20.925 | N/A |
| NM_005601.3.2      | NKG7     | chr19 | 51875193  | 51875561  | N/A | N/A | 1 | 20.925 | N/A |
| NM_002631.6.5      | PGD      | chr1  | 10464217  | 10468197  | N/A | N/A | 1 | 20.925 | N/A |
| NM_032236.15.13    | USP48    | chr1  | 22041881  | 22048257  | N/A | N/A | 1 | 20.925 | N/A |
| NM_024541.23.16    | C10orf76 | chr10 | 103699619 | 103755112 | N/A | N/A | 1 | 20.925 | N/A |
| NM_007159.5.3      | SLMAP    | chr3  | 57827025  | 57835543  | N/A | N/A | 1 | 20.925 | N/A |
| NM_017679.19.17    | BCAS3    | chr17 | 59112026  | 59118253  | N/A | N/A | 1 | 20.925 | N/A |
| NM_001256182.3.2   | ANKRD11  | chr16 | 89484691  | 89497734  | N/A | N/A | 1 | 20.925 | N/A |
| NM_016287.9.5      | HP1BP3   | chr1  | 21083658  | 21100103  | N/A | N/A | 1 | 20.925 | N/A |
| NM_015015.5.2      | KDM4B    | chr19 | 5016267   | 5041262   | N/A | N/A | 1 | 20.925 | N/A |
| NM_020428.20.17    | SLC44A2  | chr19 | 10748319  | 10748991  | N/A | N/A | 1 | 20.925 | N/A |
| NM_145297.3.2      | ZNF626   | chr19 | 20828489  | 20829211  | N/A | N/A | 1 | 20.925 | N/A |
| NM_001257191.2.2   | DDX6     | chr11 | 118656760 | 118657227 | N/A | N/A | 1 | 20.925 | N/A |
| NM_138572.8.6      | TAF8     | chr6  | 42034049  | 42044977  | N/A | N/A | 1 | 20.925 | N/A |
| NM_021729.5.4      | VPS11    | chr11 | 118940943 | 118942553 | N/A | N/A | 1 | 20.925 | N/A |
| NR_103528.13.10    | -        | chr13 | 49742748  | 49749677  | N/A | N/A | 1 | 20.925 | N/A |
| NM_031915.2.2      | SETDB2   | chr13 | 50025688  | 50026045  | N/A | N/A | 1 | 20.925 | N/A |
| NM_001784.16.11    | ADGRE5   | chr19 | 14515194  | 14518041  | N/A | N/A | 1 | 20.925 | N/A |
| NM_001018039.7.5   | SFMBT2   | chr10 | 7318853   | 7327916   | N/A | N/A | 1 | 20.925 | N/A |
| NM_207113.7.4      | SLC37A3  | chr7  | 140055467 | 140069482 | N/A | N/A | 1 | 20.925 | N/A |

|                    |          |       |           |           |     |     |   |        |     |
|--------------------|----------|-------|-----------|-----------|-----|-----|---|--------|-----|
| NM_001005207.24.20 | TRIM37   | chr17 | 57076741  | 57094785  | N/A | N/A | 1 | 20.925 | N/A |
| NM_001270978.5.2   | IST1     | chr16 | 71954641  | 71957283  | N/A | N/A | 1 | 20.925 | N/A |
| NM_017925.10.4     | DENND4C  | chr9  | 19288593  | 19305525  | N/A | N/A | 1 | 20.925 | N/A |
| NM_002285.23.19    | AFF3     | chr2  | 100170772 | 100182085 | N/A | N/A | 1 | 20.925 | N/A |
| NM_001136473.3.2   | LITAF    | chr16 | 11647388  | 11650591  | N/A | N/A | 1 | 20.925 | N/A |
| NM_001893.8.3      | CSNK1D   | chr17 | 80206750  | 80213453  | N/A | N/A | 1 | 20.925 | N/A |
| NM_014949.10.7     | KIAA0907 | chr1  | 155891165 | 155895634 | N/A | N/A | 1 | 20.925 | N/A |
| NM_001278533.11.9  | ERMARD   | chr6  | 170162524 | 170168267 | N/A | N/A | 1 | 20.925 | N/A |
| NM_020193.14.9     | EMSY     | chr11 | 76207258  | 76239510  | N/A | N/A | 1 | 20.925 | N/A |
| NM_004446.16.14    | EPRS     | chr1  | 220178589 | 220180680 | N/A | N/A | 1 | 20.925 | N/A |
| NM_001243879.5.3   | TRA2B    | chr3  | 185638891 | 185641772 | N/A | N/A | 1 | 20.925 | N/A |
| NM_001199942.4.3   | DOPEY1   | chr6  | 83806643  | 83810605  | N/A | N/A | 1 | 20.925 | N/A |
| NM_175854.6.5      | PAN3     | chr13 | 28771321  | 28794515  | N/A | N/A | 1 | 20.925 | N/A |
| NM_006321.13.12    | ARIH2    | chr3  | 49016914  | 49017929  | N/A | N/A | 1 | 20.925 | N/A |
| NM_033116.10.9     | NEK9     | chr14 | 75576387  | 75577074  | N/A | N/A | 1 | 20.925 | N/A |
| NM_004380.20.17    | CREBBP   | chr16 | 3801726   | 3808973   | N/A | N/A | 1 | 20.925 | N/A |
| NM_020823.6.4      | TMEM181  | chr6  | 159004985 | 159010814 | N/A | N/A | 1 | 20.925 | N/A |
| NM_001286724.4.2   | FAM120A  | chr9  | 96233422  | 96259881  | N/A | N/A | 1 | 20.925 | N/A |
| NM_170606.15.12    | KMT2C    | chr7  | 151935791 | 151948051 | N/A | N/A | 1 | 20.925 | N/A |
| NM_199141.4.2      | CARM1    | chr19 | 11015626  | 11019883  | N/A | N/A | 1 | 20.925 | N/A |
| NM_000885.10.5     | ITGA4    | chr2  | 182343483 | 182350719 | N/A | N/A | 1 | 20.925 | N/A |
| NR_102436.3.2      | -        | chr1  | 235993525 | 235996967 | N/A | N/A | 1 | 20.925 | N/A |
| NM_000110.8.4      | DPYD     | chr1  | 98144650  | 98206035  | N/A | N/A | 1 | 20.925 | N/A |
| NM_001202449.5.4   | ADK      | chr10 | 76153898  | 76158337  | N/A | N/A | 1 | 20.925 | N/A |
| NM_003870.35.32    | IQGAP1   | chr15 | 91030185  | 91035943  | N/A | N/A | 1 | 20.925 | N/A |
| NM_001031801.4.2   | LIMK2    | chr22 | 31654276  | 31656063  | N/A | N/A | 1 | 20.925 | N/A |
| NM_153029.4.2      | N4BP1    | chr16 | 48585296  | 48596355  | N/A | N/A | 1 | 20.925 | N/A |
| NM_003901.9.6      | SGPL1    | chr10 | 72617370  | 72629654  | N/A | N/A | 1 | 20.925 | N/A |
| NM_013300.6.3      | FAM216A  | chr12 | 110922882 | 110925748 | N/A | N/A | 1 | 20.925 | N/A |
| NM_175854.15.6     | PAN3     | chr13 | 28794367  | 28851513  | N/A | N/A | 1 | 20.925 | N/A |
| NM_001207044.6.2   | CLASP2   | chr3  | 33661094  | 33686395  | N/A | N/A | 1 | 20.925 | N/A |
| NM_001114380.18.14 | ITGAL    | chr16 | 30510394  | 30516783  | N/A | N/A | 1 | 20.925 | N/A |
| NM_003036.5.2      | SKI      | chr1  | 2234416   | 2236024   | N/A | N/A | 1 | 20.925 | N/A |

|                    |           |       |           |           |     |     |   |        |     |
|--------------------|-----------|-------|-----------|-----------|-----|-----|---|--------|-----|
| NM_000610.14.6     | CD44      | chr11 | 35218292  | 35232996  | N/A | N/A | 1 | 20.925 | N/A |
| NR_073001.3.2      | -         | chr7  | 152480271 | 152498816 | N/A | N/A | 1 | 20.925 | N/A |
| NM_194442.8.7      | LBR       | chr1  | 225600155 | 225603034 | N/A | N/A | 1 | 20.925 | N/A |
| NM_020774.3.2      | MIB1      | chr18 | 19345732  | 19348713  | N/A | N/A | 1 | 20.925 | N/A |
| NM_001012614.4.2   | CTBP1     | chr4  | 1221986   | 1235307   | N/A | N/A | 1 | 20.925 | N/A |
| NM_001002814.5.2   | RAB11FIP1 | chr8  | 37727937  | 37735069  | N/A | N/A | 1 | 20.925 | N/A |
| NM_001142446.5.4   | ANK1      | chr8  | 41584767  | 41585524  | N/A | N/A | 1 | 20.925 | N/A |
| NM_145059.3.2      | FUK       | chr16 | 70497071  | 70497677  | N/A | N/A | 1 | 20.925 | N/A |
| NM_004668.44.22    | MGAM      | chr7  | 141747584 | 141799537 | N/A | N/A | 1 | 20.925 | N/A |
| NM_000528.14.11    | MAN2B1    | chr19 | 12766507  | 12768369  | N/A | N/A | 1 | 20.925 | N/A |
| NR_026580.10.2     | -         | chr13 | 114240088 | 114292199 | N/A | N/A | 1 | 20.925 | N/A |
| NM_024947.4.2      | PHC3      | chr3  | 169889160 | 169896726 | N/A | N/A | 1 | 20.925 | N/A |
| NM_001077207.25.24 | SEC31A    | chr4  | 83745707  | 83748785  | N/A | N/A | 1 | 20.925 | N/A |
| NM_199340.9.4      | LRR37A3   | chr17 | 62864579  | 62888718  | N/A | N/A | 1 | 20.925 | N/A |
| NM_005469.5.4      | ACOT8     | chr20 | 44472165  | 44473059  | N/A | N/A | 1 | 20.925 | N/A |
| NM_002973.14.12    | ATXN2     | chr12 | 111947352 | 111948386 | N/A | N/A | 1 | 20.925 | N/A |
| NM_032043.16.13    | BRIP1     | chr17 | 59820373  | 59857762  | N/A | N/A | 1 | 20.925 | N/A |
| NM_001286644.13.5  | RFWD2     | chr1  | 175996707 | 176105683 | N/A | N/A | 1 | 20.925 | N/A |
| NM_001256.10.3     | CDC27     | chr17 | 45221248  | 45249430  | N/A | N/A | 1 | 20.925 | N/A |
| NM_005534.6.5      | IFNGR2    | chr21 | 34804483  | 34805178  | N/A | N/A | 1 | 20.925 | N/A |
| NM_001114403.5.2   | UPK3BL    | chr7  | 102279160 | 102281220 | N/A | N/A | 1 | 20.925 | N/A |
| NM_033125.7.2      | SLC22A16  | chr6  | 110752373 | 110778220 | N/A | N/A | 1 | 20.925 | N/A |
| NR_024495.8.6      | -         | chr10 | 48194832  | 48197195  | N/A | N/A | 1 | 20.925 | N/A |
| NM_170606.23.15    | KMT2C     | chr7  | 151917607 | 151935911 | N/A | N/A | 1 | 20.925 | N/A |
| NM_001190242.7.3   | IFT80     | chr3  | 160073800 | 160095328 | N/A | N/A | 1 | 20.925 | N/A |
| NM_001172671.4.3   | ZNF430    | chr19 | 21216261  | 21216990  | N/A | N/A | 1 | 20.925 | N/A |
| NR_036680.9.7      | -         | chr7  | 32672154  | 32678977  | N/A | N/A | 1 | 20.925 | N/A |
| NM_199443.8.4      | USP4      | chr3  | 49343147  | 49363278  | N/A | N/A | 1 | 20.925 | N/A |
| NM_001242768.24.23 | MTHFD1L   | chr6  | 151336015 | 151336829 | N/A | N/A | 1 | 20.925 | N/A |
| NM_018989.11.10    | RBM27     | chr5  | 145634505 | 145638156 | N/A | N/A | 1 | 20.925 | N/A |
| NM_030816.7.4      | ANKRD13C  | chr1  | 70766446  | 70781249  | N/A | N/A | 1 | 20.925 | N/A |
| NM_004990.15.8     | MARS      | chr12 | 57891939  | 57906747  | N/A | N/A | 1 | 20.925 | N/A |
| NM_015189.6.2      | EXOC6B    | chr2  | 72945231  | 72968598  | N/A | N/A | 1 | 20.925 | N/A |



|                    |          |       |           |           |     |     |   |        |     |
|--------------------|----------|-------|-----------|-----------|-----|-----|---|--------|-----|
| NM_001178035.11.8  | CEP85L   | chr6  | 118801033 | 118805021 | N/A | N/A | 1 | 20.925 | N/A |
| NM_001014431.13.2  | AKT1     | chr14 | 105237081 | 105259059 | N/A | N/A | 1 | 20.925 | N/A |
| NM_006048.6.4      | UBE4B    | chr1  | 10161165  | 10165802  | N/A | N/A | 1 | 20.925 | N/A |
| NM_001012967.13.6  | DDX60L   | chr4  | 169351628 | 169379159 | N/A | N/A | 1 | 20.925 | N/A |
| NM_178566.8.3      | ZDHHC21  | chr9  | 14639893  | 14680160  | N/A | N/A | 1 | 20.925 | N/A |
| NM_001286577.7.6   | C2CD3    | chr11 | 73843888  | 73844602  | N/A | N/A | 1 | 20.925 | N/A |
| NR_104214.7.4      | -        | chr1  | 28354299  | 28369161  | N/A | N/A | 1 | 20.925 | N/A |
| NM_014933.4.2      | SEC31A   | chr4  | 83799882  | 83803090  | N/A | N/A | 1 | 20.925 | N/A |
| NM_016028.2.2      | KMT5B    | chr11 | 67957383  | 67957619  | N/A | N/A | 1 | 20.925 | N/A |
| NM_001114403.5.4   | UPK3BL   | chr7  | 102279160 | 102279646 | N/A | N/A | 1 | 20.925 | N/A |
| NM_020823.10.7     | TMEM181  | chr6  | 159026298 | 159029782 | N/A | N/A | 1 | 20.925 | N/A |
| NM_153607.4.4      | CREBRF   | chr5  | 172517317 | 172518404 | N/A | N/A | 1 | 20.925 | N/A |
| NM_015447.4.2      | CAMSAP1  | chr9  | 138758301 | 138774924 | N/A | N/A | 1 | 20.925 | N/A |
| NM_144604.16.14    | ZC3H18   | chr16 | 88694029  | 88695262  | N/A | N/A | 1 | 20.925 | N/A |
| NM_001282129.8.6   | SSH2     | chr17 | 28003837  | 28011702  | N/A | N/A | 1 | 20.925 | N/A |
| NM_002887.7.2      | RARS     | chr5  | 167915606 | 167924353 | N/A | N/A | 1 | 20.925 | N/A |
| NM_007124.45.43    | UTRN     | chr6  | 144858717 | 144864006 | N/A | N/A | 1 | 20.925 | N/A |
| NM_020245.6.3      | TULP4    | chr6  | 158850767 | 158882761 | N/A | N/A | 1 | 20.925 | N/A |
| NM_001190964.22.20 | ZMYM2    | chr13 | 20638590  | 20641530  | N/A | N/A | 1 | 20.925 | N/A |
| NM_004733.4.2      | SLC33A1  | chr3  | 155551256 | 155560408 | N/A | N/A | 1 | 20.925 | N/A |
| NR_003369.6.2      | -        | chr16 | 29087976  | 29096597  | N/A | N/A | 1 | 20.925 | N/A |
| NM_199141.8.6      | CARM1    | chr19 | 11024552  | 11027453  | N/A | N/A | 1 | 20.925 | N/A |
| NM_001127184.3.2   | CFLAR    | chr2  | 201994451 | 201997857 | N/A | N/A | 1 | 20.925 | N/A |
| NM_001271.17.13    | CHD2     | chr15 | 93492181  | 93510743  | N/A | N/A | 1 | 20.925 | N/A |
| NM_015276.10.8     | USP22    | chr17 | 20910208  | 20914622  | N/A | N/A | 1 | 20.925 | N/A |
| NM_016287.10.5     | HP1BP3   | chr1  | 21076215  | 21100103  | N/A | N/A | 1 | 20.925 | N/A |
| NM_001145819.13.5  | SOX6     | chr11 | 16036487  | 16208501  | N/A | N/A | 1 | 20.925 | N/A |
| NM_006750.3.2      | SNTB2    | chr16 | 69279504  | 69294163  | N/A | N/A | 1 | 20.925 | N/A |
| NR_034053.5.3      | -        | chr7  | 128655032 | 128658211 | N/A | N/A | 1 | 20.925 | N/A |
| NM_017918.4.2      | CCDC109B | chr4  | 110580166 | 110585550 | N/A | N/A | 1 | 20.925 | N/A |
| NM_003298.5.4      | NR2C2    | chr3  | 15055095  | 15057761  | N/A | N/A | 1 | 20.925 | N/A |
| NM_012486.8.6      | PSEN2    | chr1  | 227073238 | 227076750 | N/A | N/A | 1 | 20.925 | N/A |
| NR_036627.13.12    | -        | chr3  | 50145502  | 50145737  | N/A | N/A | 1 | 20.925 | N/A |

|                    |           |       |           |           |     |     |   |        |     |
|--------------------|-----------|-------|-----------|-----------|-----|-----|---|--------|-----|
| NR_028040.5.2      | -         | chr7  | 99820219  | 99831297  | N/A | N/A | 1 | 20.925 | N/A |
| NM_030938.5.2      | VMP1      | chr17 | 57808781  | 57816308  | N/A | N/A | 1 | 20.925 | N/A |
| NM_001199282.34.31 | LRBA      | chr4  | 151719232 | 151738409 | N/A | N/A | 1 | 20.925 | N/A |
| NM_001282539.6.4   | GNB1      | chr1  | 1735857   | 1747301   | N/A | N/A | 1 | 20.925 | N/A |
| NM_001098794.6.2   | FAM160A2  | chr11 | 6243671   | 6245937   | N/A | N/A | 1 | 20.925 | N/A |
| NM_032932.14.11    | RAB11FIP4 | chr17 | 29854859  | 29857487  | N/A | N/A | 1 | 20.925 | N/A |
| NM_000887.14.9     | ITGAX     | chr16 | 31372383  | 31374695  | N/A | N/A | 1 | 20.925 | N/A |
| NM_001284382.4.3   | UBE2Q2    | chr15 | 76161291  | 76165909  | N/A | N/A | 1 | 20.925 | N/A |
| NM_017554.5.4      | PARP14    | chr3  | 122411147 | 122414509 | N/A | N/A | 1 | 20.925 | N/A |
| NM_007373.3.2      | SHOC2     | chr10 | 112723882 | 112745523 | N/A | N/A | 1 | 20.925 | N/A |
| NM_014972.13.8     | TCF25     | chr16 | 89961445  | 89970613  | N/A | N/A | 1 | 20.925 | N/A |
| NM_014992.2.1      | DAAM1     | chr14 | 59730158  | 59758024  | N/A | N/A | 1 | 20.925 | N/A |
| NM_175710.10.6     | CR1L      | chr1  | 207870847 | 207881608 | N/A | N/A | 1 | 20.925 | N/A |
| NM_175710.10.5     | CR1L      | chr1  | 207867697 | 207881608 | N/A | N/A | 1 | 20.925 | N/A |
| NM_001277126.5.2   | NLRP12    | chr19 | 54308533  | 54318242  | N/A | N/A | 1 | 20.925 | N/A |
| NM_001130926.6.4   | MEF2A     | chr15 | 100211527 | 100215663 | N/A | N/A | 1 | 20.925 | N/A |
| NM_000560.3.2      | CD53      | chr1  | 111434013 | 111435155 | N/A | N/A | 1 | 20.925 | N/A |
| NM_133494.5.2      | NEK7      | chr1  | 198201682 | 198233365 | N/A | N/A | 1 | 20.925 | N/A |
| NM_173514.11.9     | SLC38A9   | chr5  | 54945034  | 54952602  | N/A | N/A | 1 | 20.925 | N/A |
| NM_005359.10.5     | SMAD4     | chr18 | 48581150  | 48593557  | N/A | N/A | 1 | 20.925 | N/A |
| NM_001111112.4.2   | UBE2K     | chr4  | 39739039  | 39757359  | N/A | N/A | 1 | 20.925 | N/A |
| NR_023361.4.2      | -         | chr15 | 90420537  | 90432372  | N/A | N/A | 1 | 20.925 | N/A |
| NM_152718.14.12    | VWCE      | chr11 | 61039146  | 61042056  | N/A | N/A | 1 | 20.925 | N/A |
| NM_005848.11.8     | DENND4A   | chr15 | 66021409  | 66025156  | N/A | N/A | 1 | 20.925 | N/A |
| NM_020458.5.4      | TTC7A     | chr2  | 47202111  | 47206046  | N/A | N/A | 1 | 20.925 | N/A |
| NM_015073.12.11    | SIPA1L3   | chr19 | 38631823  | 38633350  | N/A | N/A | 1 | 20.925 | N/A |
| NM_012241.3.2      | SIRT5     | chr6  | 13579682  | 13584457  | N/A | N/A | 1 | 20.925 | N/A |
| NR_002934.9.2      | -         | chr10 | 135269740 | 135280857 | N/A | N/A | 1 | 20.925 | N/A |
| NM_024313.4.2      | NOL12     | chr22 | 38083916  | 38084999  | N/A | N/A | 1 | 20.925 | N/A |
| NM_207116.15.14    | RNF216    | chr7  | 5680784   | 5692141   | N/A | N/A | 1 | 20.925 | N/A |
| NM_003922.64.47    | HERC1     | chr15 | 63929703  | 63952135  | N/A | N/A | 1 | 20.925 | N/A |
| NM_014606.10.4     | HERC3     | chr4  | 89570990  | 89579642  | N/A | N/A | 1 | 20.925 | N/A |
| NM_001128602.11.10 | RASGRP1   | chr15 | 38794512  | 38798121  | N/A | N/A | 1 | 20.925 | N/A |

|                    |          |       |           |           |     |     |   |        |     |
|--------------------|----------|-------|-----------|-----------|-----|-----|---|--------|-----|
| NM_001707.4.3      | BCL7B    | chr7  | 72954211  | 72957974  | N/A | N/A | 1 | 20.925 | N/A |
| NM_005626.4.4      | SRSF4    | chr1  | 29481207  | 29481422  | N/A | N/A | 1 | 20.925 | N/A |
| NM_152707.6.5      | SLC25A16 | chr10 | 70252888  | 70253327  | N/A | N/A | 1 | 20.925 | N/A |
| NM_016316.9.7      | REV1     | chr2  | 100046301 | 100052403 | N/A | N/A | 1 | 20.925 | N/A |
| NM_006662.4.4      | SRCAP    | chr16 | 30715384  | 30715636  | N/A | N/A | 1 | 20.925 | N/A |
| NM_001243737.3.2   | TRAPPC13 | chr5  | 64931127  | 64931870  | N/A | N/A | 1 | 20.925 | N/A |
| NM_015239.3.2      | AGTPBP1  | chr9  | 88307603  | 88327481  | N/A | N/A | 1 | 20.925 | N/A |
| NM_007055.17.15    | POLR3A   | chr10 | 79761954  | 79767624  | N/A | N/A | 1 | 20.925 | N/A |
| NM_153827.11.2     | MINK1    | chr17 | 4781611   | 4790474   | N/A | N/A | 1 | 20.925 | N/A |
| NM_024105.7.4      | ALG12    | chr22 | 50301368  | 50304255  | N/A | N/A | 1 | 20.925 | N/A |
| NM_018046.7.6      | AGGF1    | chr5  | 76342171  | 76344097  | N/A | N/A | 1 | 20.925 | N/A |
| NM_000946.9.5      | PRIM1    | chr12 | 57135218  | 57139965  | N/A | N/A | 1 | 20.925 | N/A |
| NM_001161454.6.5   | CYB561A3 | chr11 | 61120456  | 61121464  | N/A | N/A | 1 | 20.925 | N/A |
| NM_000946.9.7      | PRIM1    | chr12 | 57135218  | 57136880  | N/A | N/A | 1 | 20.925 | N/A |
| NM_001440.3.2      | EXTL3    | chr8  | 28570973  | 28575724  | N/A | N/A | 1 | 20.925 | N/A |
| NM_001160167.3.2   | PRR5L    | chr11 | 36422546  | 36424928  | N/A | N/A | 1 | 20.925 | N/A |
| NM_024857.15.12    | ATAD5    | chr17 | 29195350  | 29203568  | N/A | N/A | 1 | 20.925 | N/A |
| NM_001109662.7.5   | HECTD4   | chr12 | 112743867 | 112747473 | N/A | N/A | 1 | 20.925 | N/A |
| NM_001109662.7.4   | HECTD4   | chr12 | 112743867 | 112750951 | N/A | N/A | 1 | 20.925 | N/A |
| NM_017453.3.2      | STAU1    | chr20 | 47782533  | 47790806  | N/A | N/A | 1 | 20.925 | N/A |
| NM_001278210.11.6  | NUP153   | chr6  | 17661883  | 17669777  | N/A | N/A | 1 | 20.925 | N/A |
| NM_014611.64.54    | MDN1     | chr6  | 90400391  | 90411780  | N/A | N/A | 1 | 20.925 | N/A |
| NM_001145354.7.3   | MKLN1    | chr7  | 131060182 | 131084192 | N/A | N/A | 1 | 20.925 | N/A |
| NM_006468.5.3      | POLR3C   | chr1  | 145606274 | 145608659 | N/A | N/A | 1 | 20.925 | N/A |
| NM_012327.13.2     | PIGN     | chr18 | 59805475  | 59830889  | N/A | N/A | 1 | 20.925 | N/A |
| NM_016227.9.3      | SUCO     | chr1  | 172520651 | 172539870 | N/A | N/A | 1 | 20.925 | N/A |
| NM_001286531.4.2   | RAD9B    | chr12 | 110941610 | 110944498 | N/A | N/A | 1 | 20.925 | N/A |
| NM_002519.9.4      | NPAT     | chr11 | 108056129 | 108062917 | N/A | N/A | 1 | 20.925 | N/A |
| NM_003342.5.3      | UBE2G1   | chr17 | 4186092   | 4200109   | N/A | N/A | 1 | 20.925 | N/A |
| NM_001109662.54.42 | HECTD4   | chr12 | 112641439 | 112666615 | N/A | N/A | 1 | 20.925 | N/A |
| NM_003342.5.2      | UBE2G1   | chr17 | 4186092   | 4210418   | N/A | N/A | 1 | 20.925 | N/A |
| NR_027155.11.11    | -        | chr16 | 21478412  | 21478637  | N/A | N/A | 1 | 20.925 | N/A |
| NR_046386.4.2      | -        | chr9  | 6420911   | 6460791   | N/A | N/A | 1 | 20.925 | N/A |

|                    |          |       |           |           |     |     |   |        |     |
|--------------------|----------|-------|-----------|-----------|-----|-----|---|--------|-----|
| NM_015396.13.3     | ARMC8    | chr3  | 137928658 | 137964025 | N/A | N/A | 1 | 20.925 | N/A |
| NM_016016.5.2      | SLC25A39 | chr17 | 42399786  | 42400945  | N/A | N/A | 1 | 20.925 | N/A |
| NM_006386.8.2      | DDX17    | chr22 | 38890634  | 38897285  | N/A | N/A | 1 | 20.925 | N/A |
| NM_024820.10.2     | DENND1A  | chr9  | 126392654 | 126641300 | N/A | N/A | 1 | 20.925 | N/A |
| NM_004457.4.3      | ACSL3    | chr2  | 223765391 | 223773868 | N/A | N/A | 1 | 20.925 | N/A |
| NM_002691.3.2      | POLD1    | chr19 | 50902107  | 50902741  | N/A | N/A | 1 | 20.925 | N/A |
| NM_001128148.4.3   | TFRC     | chr3  | 195800800 | 195802231 | N/A | N/A | 1 | 20.925 | N/A |
| NM_001205247.17.15 | ACSL6    | chr5  | 131302108 | 131305893 | N/A | N/A | 1 | 20.925 | N/A |
| NM_054027.8.3      | ANKH     | chr5  | 14741935  | 14758707  | N/A | N/A | 1 | 20.925 | N/A |
| NM_001256126.8.5   | CERS6    | chr2  | 169547543 | 169574488 | N/A | N/A | 1 | 20.925 | N/A |
| NM_001039650.4.3   | ZMYM5    | chr13 | 20425494  | 20426330  | N/A | N/A | 1 | 20.925 | N/A |
| NM_001102.11.10    | ACTN1    | chr14 | 69356855  | 69359000  | N/A | N/A | 1 | 20.925 | N/A |
| NM_198450.8.6      | APOOL    | chrX  | 84322132  | 84329397  | N/A | N/A | 1 | 20.925 | N/A |
| NM_007331.5.4      | WHSC1    | chr4  | 1902352   | 1906105   | N/A | N/A | 1 | 20.925 | N/A |
| NR_024386.10.7     | -        | chr17 | 62782684  | 62793527  | N/A | N/A | 1 | 20.925 | N/A |
| NM_020536.6.4      | KAT14    | chr20 | 18139727  | 18143589  | N/A | N/A | 1 | 20.925 | N/A |
| NM_015132.9.2      | SNX13    | chr7  | 17908029  | 17937069  | N/A | N/A | 1 | 20.925 | N/A |
| NM_015185.6.3      | ARHGEF9  | chrX  | 62893917  | 62926329  | N/A | N/A | 1 | 20.925 | N/A |
| NM_005465.8.1      | AKT3     | chr1  | 243736227 | 244006584 | N/A | N/A | 1 | 20.925 | N/A |
| NM_005990.16.15    | STK10    | chr5  | 171482591 | 171484477 | N/A | N/A | 1 | 20.925 | N/A |
| NM_017880.9.3      | C2orf42  | chr2  | 70387756  | 70409129  | N/A | N/A | 1 | 20.925 | N/A |
| NM_001190214.3.2   | PIIP5K1  | chr15 | 43876555  | 43877090  | N/A | N/A | 1 | 20.925 | N/A |
| NM_014756.5.2      | CKAP5    | chr11 | 46832556  | 46842819  | N/A | N/A | 1 | 20.925 | N/A |
| NM_002647.21.14    | PIK3C3   | chr18 | 39607406  | 39629569  | N/A | N/A | 1 | 20.925 | N/A |
| NM_002830.16.13    | PTPN4    | chr2  | 120684173 | 120702816 | N/A | N/A | 1 | 20.925 | N/A |
| NM_001114380.11.10 | ITGAL    | chr16 | 30505532  | 30506171  | N/A | N/A | 1 | 20.925 | N/A |
| NM_001488.6.2      | TADA2A   | chr17 | 35771355  | 35800763  | N/A | N/A | 1 | 20.925 | N/A |
| NM_153050.5.3      | MTMR3    | chr22 | 30366964  | 30375041  | N/A | N/A | 1 | 20.925 | N/A |
| NM_002498.10.4     | NEK3     | chr13 | 52718050  | 52728127  | N/A | N/A | 1 | 20.925 | N/A |
| NM_001105214.9.4   | ASH2L    | chr8  | 37967896  | 37976881  | N/A | N/A | 1 | 20.925 | N/A |
| NM_005688.5.2      | ABCC5    | chr3  | 183705557 | 183732235 | N/A | N/A | 1 | 20.925 | N/A |
| NM_001009814.17.15 | VWA8     | chr13 | 42385360  | 42393522  | N/A | N/A | 1 | 20.925 | N/A |
| NM_001134937.12.11 | FIP1L1   | chr4  | 54292038  | 54294350  | N/A | N/A | 1 | 20.925 | N/A |

|                    |         |       |           |           |     |     |   |        |     |
|--------------------|---------|-------|-----------|-----------|-----|-----|---|--------|-----|
| NM_001127660.3.2   | MFN2    | chr1  | 12049221  | 12052747  | N/A | N/A | 1 | 20.925 | N/A |
| NM_014957.7.6      | DENND3  | chr8  | 142160932 | 142161936 | N/A | N/A | 1 | 20.925 | N/A |
| NM_022366.4.3      | TFB2M   | chr1  | 246719874 | 246720836 | N/A | N/A | 1 | 20.925 | N/A |
| NM_152279.4.2      | ZNF585B | chr19 | 37680562  | 37698156  | N/A | N/A | 1 | 20.925 | N/A |
| NM_018489.7.4      | ASH1L   | chr1  | 155365249 | 155429689 | N/A | N/A | 1 | 20.925 | N/A |
| NM_015060.12.2     | AVL9    | chr7  | 32582752  | 32613030  | N/A | N/A | 1 | 20.925 | N/A |
| NR_037193.7.2      | -       | chr11 | 62650379  | 62653080  | N/A | N/A | 1 | 20.925 | N/A |
| NM_001144912.11.7  | ATG7    | chr3  | 11372813  | 11389509  | N/A | N/A | 1 | 20.925 | N/A |
| NM_017437.9.2      | CPSF2   | chr14 | 92592465  | 92609638  | N/A | N/A | 1 | 20.925 | N/A |
| NM_018230.9.6      | NUP133  | chr1  | 229625701 | 229634053 | N/A | N/A | 1 | 20.925 | N/A |
| NM_001280539.4.3   | RNF19A  | chr8  | 101287180 | 101300495 | N/A | N/A | 1 | 20.925 | N/A |
| NR_048537.9.6      | -       | chr20 | 48466115  | 48481381  | N/A | N/A | 1 | 20.925 | N/A |
| NM_018126.4.3      | TMEM33  | chr4  | 41941212  | 41945831  | N/A | N/A | 1 | 20.925 | N/A |
| NM_003972.11.6     | BTA1    | chr10 | 93713493  | 93719911  | N/A | N/A | 1 | 20.925 | N/A |
| NM_032012.8.2      | TMEM245 | chr9  | 111843118 | 111870850 | N/A | N/A | 1 | 20.925 | N/A |
| NM_002372.20.18    | MAN2A1  | chr5  | 109181565 | 109191035 | N/A | N/A | 1 | 20.925 | N/A |
| NM_018318.7.3      | CCDC91  | chr12 | 28458581  | 28544344  | N/A | N/A | 1 | 20.925 | N/A |
| NM_003286.13.9     | TOP1    | chr20 | 39721111  | 39729993  | N/A | N/A | 1 | 20.925 | N/A |
| NM_015914.11.7     | TXNDC11 | chr16 | 11778020  | 11792181  | N/A | N/A | 1 | 20.925 | N/A |
| NM_024117.9.8      | MAPKAP1 | chr9  | 128230250 | 128246862 | N/A | N/A | 1 | 20.925 | N/A |
| NM_001288999.7.5   | GMIP    | chr19 | 19750893  | 19751380  | N/A | N/A | 1 | 20.925 | N/A |
| NM_006519.4.3      | DYNLT1  | chr6  | 159058159 | 159058926 | N/A | N/A | 1 | 20.925 | N/A |
| NM_006519.4.2      | DYNLT1  | chr6  | 159058159 | 159062392 | N/A | N/A | 1 | 20.925 | N/A |
| NM_016824.14.10    | ADD3    | chr10 | 111883774 | 111892158 | N/A | N/A | 1 | 20.925 | N/A |
| NM_032206.23.15    | NLRC5   | chr16 | 57073692  | 57085533  | N/A | N/A | 1 | 20.925 | N/A |
| NM_145206.5.2      | VTI1A   | chr10 | 114220282 | 114298089 | N/A | N/A | 1 | 20.925 | N/A |
| NM_194282.5.3      | LIN54   | chr4  | 83867410  | 83900159  | N/A | N/A | 1 | 20.925 | N/A |
| NM_001116.8.7      | ADCY9   | chr16 | 4029116   | 4033441   | N/A | N/A | 1 | 20.925 | N/A |
| NM_001252078.8.7   | USP15   | chr12 | 62743001  | 62749256  | N/A | N/A | 1 | 20.925 | N/A |
| NM_001114380.11.3  | ITGAL   | chr16 | 30486626  | 30506171  | N/A | N/A | 1 | 20.925 | N/A |
| NM_014709.44.33    | USP34   | chr2  | 61486845  | 61520685  | N/A | N/A | 1 | 20.925 | N/A |
| NM_130438.2.1      | DYRK1A  | chr21 | 38792600  | 38845182  | N/A | N/A | 2 | 41.85  | N/A |
| NM_001130065.26.23 | MYO9B   | chr19 | 17308600  | 17311638  | N/A | N/A | 2 | 41.85  | N/A |

|                    |          |       |           |           |     |     |   |       |     |
|--------------------|----------|-------|-----------|-----------|-----|-----|---|-------|-----|
| NM_017607.6.4      | PPP1R12C | chr19 | 55610151  | 55614936  | N/A | N/A | 2 | 41.85 | N/A |
| NM_001746.10.7     | CANX     | chr5  | 179136873 | 179147561 | N/A | N/A | 2 | 41.85 | N/A |
| NM_001031623.7.4   | ZNF451   | chr6  | 56989531  | 56999668  | N/A | N/A | 2 | 41.85 | N/A |
| NM_001198665.20.12 | ARHGEF12 | chr11 | 120310837 | 120319923 | N/A | N/A | 2 | 41.85 | N/A |
| NM_006421.19.15    | ARFGEF1  | chr8  | 68163533  | 68172161  | N/A | N/A | 2 | 41.85 | N/A |
| NM_003922.26.22    | HERC1    | chr15 | 63990926  | 64008672  | N/A | N/A | 2 | 41.85 | N/A |
| NM_182641.17.16    | BPTF     | chr17 | 65924470  | 65925603  | N/A | N/A | 2 | 41.85 | N/A |
| NM_002605.15.14    | PDE8A    | chr15 | 85657103  | 85658718  | N/A | N/A | 2 | 41.85 | N/A |
| NM_003576.5.2      | STK24    | chr13 | 99127074  | 99171727  | N/A | N/A | 2 | 41.85 | N/A |
| NM_001270660.21.20 | 38777    | chr5  | 10415599  | 10417516  | N/A | N/A | 2 | 41.85 | N/A |
| NM_018691.4.2      | FAM114A2 | chr5  | 153413350 | 153414527 | N/A | N/A | 2 | 41.85 | N/A |
| NM_032142.21.2     | CEP192   | chr18 | 12999419  | 13059311  | N/A | N/A | 2 | 41.85 | N/A |
| NM_138570.10.3     | SLC38A10 | chr17 | 79244717  | 79258695  | N/A | N/A | 2 | 41.85 | N/A |
| NM_018202.4.3      | TMEM57   | chr1  | 25775298  | 25780873  | N/A | N/A | 2 | 41.85 | N/A |
| NR_024448.10.8     | -        | chr22 | 24025911  | 24037704  | N/A | N/A | 2 | 41.85 | N/A |
| NM_173163.9.8      | NFATC3   | chr16 | 68217142  | 68225678  | N/A | N/A | 2 | 41.85 | N/A |
| NM_024947.11.9     | PHC3     | chr3  | 169831147 | 169840532 | N/A | N/A | 2 | 41.85 | N/A |
| NM_015172.32.27    | PRRC2C   | chr1  | 171548492 | 171556890 | N/A | N/A | 2 | 41.85 | N/A |
| NM_001242539.13.11 | NCOA6    | chr20 | 33315062  | 33324562  | N/A | N/A | 2 | 41.85 | N/A |
| NM_001146037.7.6   | SLC14A1  | chr18 | 43319127  | 43319627  | N/A | N/A | 2 | 41.85 | N/A |
| NM_017921.5.3      | NPLOC4   | chr17 | 79577235  | 79589304  | N/A | N/A | 2 | 41.85 | N/A |
| NM_001271.38.35    | CHD2     | chr15 | 93552374  | 93563488  | N/A | N/A | 2 | 41.85 | N/A |
| NM_001738.3.2      | CA1      | chr8  | 86253827  | 86264013  | N/A | N/A | 2 | 41.85 | N/A |
| NM_017491.5.3      | WDR1     | chr4  | 10099334  | 10105610  | N/A | N/A | 2 | 41.85 | N/A |
| NM_006586.3.2      | CNPY3    | chr6  | 42902212  | 42903408  | N/A | N/A | 2 | 41.85 | N/A |
| NM_053067.3.2      | UBQLN1   | chr9  | 86297865  | 86301070  | N/A | N/A | 2 | 41.85 | N/A |
| NM_145243.8.3      | OMA1     | chr1  | 58971731  | 59002413  | N/A | N/A | 2 | 41.85 | N/A |
| NM_016567.7.2      | BCCIP    | chr10 | 127515159 | 127529899 | N/A | N/A | 2 | 41.85 | N/A |
| NM_001042734.2.2   | SEC24B   | chr4  | 110384056 | 110384800 | N/A | N/A | 2 | 41.85 | N/A |
| NR_002212.3.2      | -        | chr12 | 93788384  | 93789309  | N/A | N/A | 2 | 41.85 | N/A |
| NM_003184.14.7     | TAF2     | chr8  | 120800577 | 120810086 | N/A | N/A | 2 | 41.85 | N/A |
| NM_006267.23.21    | RANBP2   | chr2  | 109388156 | 109389502 | N/A | N/A | 2 | 41.85 | N/A |
| NM_022743.8.6      | SMYD3    | chr1  | 246078831 | 246093239 | N/A | N/A | 2 | 41.85 | N/A |

|                    |          |       |           |           |     |     |   |       |     |
|--------------------|----------|-------|-----------|-----------|-----|-----|---|-------|-----|
| NM_014676.7.6      | PUM1     | chr1  | 31465236  | 31468067  | N/A | N/A | 2 | 41.85 | N/A |
| NM_025160.12.8     | WDR26    | chr1  | 224585798 | 224592272 | N/A | N/A | 2 | 41.85 | N/A |
| NM_012335.8.5      | MYO1F    | chr19 | 8616623   | 8618321   | N/A | N/A | 2 | 41.85 | N/A |
| NM_016551.7.6      | TM7SF3   | chr12 | 27135705  | 27143560  | N/A | N/A | 2 | 41.85 | N/A |
| NM_139126.9.8      | PPIL4    | chr6  | 149846278 | 149847912 | N/A | N/A | 2 | 41.85 | N/A |
| NM_005359.8.6      | SMAD4    | chr18 | 48584494  | 48586286  | N/A | N/A | 2 | 41.85 | N/A |
| NM_004819.3.2      | SYMPK    | chr19 | 46357432  | 46357765  | N/A | N/A | 2 | 41.85 | N/A |
| NM_001429.9.7      | EP300    | chr22 | 41531816  | 41536261  | N/A | N/A | 2 | 41.85 | N/A |
| NM_015024.9.8      | XPO7     | chr8  | 21835280  | 21837714  | N/A | N/A | 2 | 41.85 | N/A |
| NM_006642.9.6      | SDCCAG8  | chr1  | 243456392 | 243480195 | N/A | N/A | 2 | 41.85 | N/A |
| NM_019004.3.2      | ANKIB1   | chr7  | 91924202  | 91936970  | N/A | N/A | 2 | 41.85 | N/A |
| NM_001190879.5.2   | ORC4     | chr2  | 148730307 | 148739650 | N/A | N/A | 2 | 41.85 | N/A |
| NM_198081.3.2      | SCML4    | chr6  | 108070887 | 108093590 | N/A | N/A | 2 | 41.85 | N/A |
| NM_001130148.8.6   | CCDC77   | chr12 | 541031    | 547720    | N/A | N/A | 2 | 41.85 | N/A |
| NM_174917.4.2      | ACSF3    | chr16 | 89164998  | 89169167  | N/A | N/A | 2 | 41.85 | N/A |
| NM_017546.3.2      | CNOT11   | chr2  | 101874252 | 101879153 | N/A | N/A | 2 | 41.85 | N/A |
| NM_001009999.4.2   | KDM1A    | chr1  | 23356961  | 23377013  | N/A | N/A | 2 | 41.85 | N/A |
| NM_020784.6.2      | TXNDC16  | chr14 | 53003436  | 53011089  | N/A | N/A | 2 | 41.85 | N/A |
| NM_022773.4.2      | LMF1     | chr16 | 960930    | 1004666   | N/A | N/A | 2 | 41.85 | N/A |
| NM_198889.28.28    | ANKRD17  | chr4  | 73956383  | 73958017  | N/A | N/A | 2 | 41.85 | N/A |
| NM_016589.4.2      | TIMMDC1  | chr3  | 119219541 | 119222868 | N/A | N/A | 2 | 41.85 | N/A |
| NM_005085.32.31    | NUP214   | chr9  | 134090598 | 134098317 | N/A | N/A | 2 | 41.85 | N/A |
| NM_001131007.32.30 | KIAA0922 | chr4  | 154547298 | 154553990 | N/A | N/A | 2 | 41.85 | N/A |
| NR_110283.3.2      | -        | chr2  | 208102543 | 208105062 | N/A | N/A | 2 | 41.85 | N/A |
| NM_001083617.5.2   | RB1CC1   | chr8  | 53596108  | 53599527  | N/A | N/A | 2 | 41.85 | N/A |
| NM_133433.9.2      | NIPBL    | chr5  | 36953719  | 36976504  | N/A | N/A | 2 | 41.85 | N/A |
| NM_020476.31.30    | ANK1     | chr8  | 41550165  | 41550719  | N/A | N/A | 2 | 41.85 | N/A |
| NM_002149.3.3      | HPCAL1   | chr2  | 10559859  | 10560261  | N/A | N/A | 2 | 41.85 | N/A |
| NM_005339.6.2      | UBE2K    | chr4  | 39739039  | 39779430  | N/A | N/A | 2 | 41.85 | N/A |
| NM_001080432.7.5   | FTO      | chr16 | 53907697  | 53922863  | N/A | N/A | 2 | 41.85 | N/A |
| NM_025137.36.34    | SPG11    | chr15 | 44859621  | 44862856  | N/A | N/A | 2 | 41.85 | N/A |
| NM_139132.8.5      | NUP98    | chr11 | 3789810   | 3797251   | N/A | N/A | 2 | 41.85 | N/A |
| NM_007110.7.3      | TEP1     | chr14 | 20871535  | 20874559  | N/A | N/A | 2 | 41.85 | N/A |

|                    |          |       |           |           |     |     |   |       |     |
|--------------------|----------|-------|-----------|-----------|-----|-----|---|-------|-----|
| NM_014957.10.9     | DENND3   | chr8  | 142170730 | 142173528 | N/A | N/A | 2 | 41.85 | N/A |
| NM_003045.5.2      | SLC7A1   | chr13 | 30104674  | 30127997  | N/A | N/A | 2 | 41.85 | N/A |
| NM_145080.5.3      | NSMCE1   | chr16 | 27244321  | 27246620  | N/A | N/A | 2 | 41.85 | N/A |
| NM_001110303.23.19 | USP20    | chr9  | 132637107 | 132640719 | N/A | N/A | 2 | 41.85 | N/A |
| NM_001282681.6.2   | GAPVD1   | chr9  | 128064261 | 128074891 | N/A | N/A | 2 | 41.85 | N/A |
| NM_000126.9.2      | ETFA     | chr15 | 76566752  | 76588078  | N/A | N/A | 2 | 41.85 | N/A |
| NM_016293.10.9     | BIN2     | chr12 | 51685374  | 51689662  | N/A | N/A | 2 | 41.85 | N/A |
| NR_073070.5.3      | -        | chr4  | 56277780  | 56284152  | N/A | N/A | 2 | 41.85 | N/A |
| NM_001145666.22.19 | GLG1     | chr16 | 74493579  | 74497377  | N/A | N/A | 2 | 41.85 | N/A |
| NM_014869.3.2      | IQSEC1   | chr3  | 12976947  | 12983365  | N/A | N/A | 2 | 41.85 | N/A |
| NM_206921.3.3      | CEP85L   | chr6  | 118886691 | 118887479 | N/A | N/A | 2 | 41.85 | N/A |
| NM_017550.3.2      | MIER2    | chr19 | 334399    | 336173    | N/A | N/A | 2 | 41.85 | N/A |
| NM_001142640.12.11 | TNRC6C   | chr17 | 76075475  | 76079247  | N/A | N/A | 2 | 41.85 | N/A |
| NM_005197.2.2      | FOXN3    | chr14 | 89878277  | 89878834  | N/A | N/A | 2 | 41.85 | N/A |
| NM_012235.8.4      | SCAP     | chr3  | 47466974  | 47470160  | N/A | N/A | 2 | 41.85 | N/A |
| NR_003655.7.5      | -        | chr7  | 44026199  | 44027846  | N/A | N/A | 2 | 41.85 | N/A |
| NM_007011.9.6      | ABHD2    | chr15 | 89656955  | 89698765  | N/A | N/A | 2 | 41.85 | N/A |
| NM_013236.9.7      | ATXN10   | chr22 | 46125304  | 46136418  | N/A | N/A | 2 | 41.85 | N/A |
| NM_018441.7.4      | PECR     | chr2  | 216908626 | 216923699 | N/A | N/A | 2 | 41.85 | N/A |
| NM_001167608.7.4   | RHBDD1   | chr2  | 227729319 | 227773594 | N/A | N/A | 2 | 41.85 | N/A |
| NM_030650.5.2      | KIAA1715 | chr2  | 176844537 | 176860374 | N/A | N/A | 2 | 41.85 | N/A |
| NM_001242906.14.5  | ASCC2    | chr22 | 30196979  | 30212062  | N/A | N/A | 2 | 41.85 | N/A |
| NM_016396.7.6      | CTDSPL2  | chr15 | 44788577  | 44789336  | N/A | N/A | 2 | 41.85 | N/A |
| NM_182540.9.3      | INTS6L   | chrX  | 134679347 | 134690225 | N/A | N/A | 2 | 41.85 | N/A |
| NM_018230.21.19    | NUP133   | chr1  | 229593907 | 229599423 | N/A | N/A | 2 | 41.85 | N/A |
| NM_130807.4.3      | MOB3A    | chr19 | 2076809   | 2078678   | N/A | N/A | 2 | 41.85 | N/A |
| NM_001097615.8.5   | POLR2J3  | chr7  | 102180052 | 102182109 | N/A | N/A | 2 | 41.85 | N/A |
| NM_001278610.7.7   | MYBL2    | chr20 | 42331129  | 42331543  | N/A | N/A | 2 | 41.85 | N/A |
| NM_001127715.4.2   | STXBP5   | chr6  | 147527106 | 147560406 | N/A | N/A | 2 | 41.85 | N/A |
| NM_001042573.3.2   | ENGASE   | chr17 | 77073511  | 77073946  | N/A | N/A | 2 | 41.85 | N/A |
| NM_001105562.6.3   | UBE4B    | chr1  | 10155518  | 10165802  | N/A | N/A | 2 | 41.85 | N/A |
| NM_153341.3.2      | RNF19B   | chr1  | 33413822  | 33415375  | N/A | N/A | 2 | 41.85 | N/A |
| NM_014868.14.13    | RNF10    | chr12 | 121004627 | 121009094 | N/A | N/A | 2 | 41.85 | N/A |



|                   |          |       |           |           |     |     |   |       |     |
|-------------------|----------|-------|-----------|-----------|-----|-----|---|-------|-----|
| NM_018124.2.2     | RFWD3    | chr16 | 74694829  | 74695349  | N/A | N/A | 2 | 41.85 | N/A |
| NM_015355.8.4     | SUZ12    | chr17 | 30274635  | 30303633  | N/A | N/A | 2 | 41.85 | N/A |
| NM_020477.20.16   | ANK1     | chr8  | 41561558  | 41571772  | N/A | N/A | 2 | 41.85 | N/A |
| NM_001134338.5.2  | RNF24    | chr20 | 3925823   | 3955047   | N/A | N/A | 2 | 41.85 | N/A |
| NM_018023.20.20   | YEATS2   | chr3  | 183503912 | 183504089 | N/A | N/A | 2 | 41.85 | N/A |
| NM_001145819.6.4  | SOX6     | chr11 | 16205431  | 16256217  | N/A | N/A | 2 | 41.85 | N/A |
| NM_145648.5.2     | SLC15A4  | chr12 | 129293332 | 129299615 | N/A | N/A | 2 | 41.85 | N/A |
| NM_001278210.13.6 | NUP153   | chr6  | 17648037  | 17669777  | N/A | N/A | 2 | 41.85 | N/A |
| NM_020773.3.2     | TBC1D14  | chr4  | 6925099   | 6969151   | N/A | N/A | 2 | 41.85 | N/A |
| NM_001167971.5.4  | TRMT2B   | chrX  | 100296305 | 100297301 | N/A | N/A | 2 | 41.85 | N/A |
| NM_001114091.8.5  | CDC27    | chr17 | 45232037  | 45235669  | N/A | N/A | 2 | 41.85 | N/A |
| NM_153337.3.2     | SNX20    | chr16 | 50709680  | 50711446  | N/A | N/A | 2 | 41.85 | N/A |
| NM_144600.3.2     | FOPNL    | chr16 | 15973660  | 15978062  | N/A | N/A | 2 | 41.85 | N/A |
| NM_199340.7.5     | LRRC37A3 | chr17 | 62882203  | 62885870  | N/A | N/A | 2 | 41.85 | N/A |
| NM_005819.7.4     | STX6     | chr1  | 180953812 | 180962561 | N/A | N/A | 2 | 41.85 | N/A |
| NM_006838.7.4     | METAP2   | chr12 | 95879654  | 95889874  | N/A | N/A | 2 | 41.85 | N/A |
| NM_017552.7.2     | ATAD2B   | chr2  | 24103508  | 24118840  | N/A | N/A | 2 | 41.85 | N/A |
| NM_018489.5.5     | ASH1L    | chr1  | 155408117 | 155408859 | N/A | N/A | 2 | 41.85 | N/A |
| NM_001494.5.2     | GDI2     | chr10 | 5827814   | 5842668   | N/A | N/A | 2 | 41.85 | N/A |
| NM_014801.17.13   | PCNX2    | chr1  | 233313547 | 233344435 | N/A | N/A | 2 | 41.85 | N/A |
| NM_001256183.4.3  | ANKRD11  | chr16 | 89371613  | 89383483  | N/A | N/A | 2 | 41.85 | N/A |
| NM_206943.7.5     | LTBP1    | chr2  | 33359859  | 33413918  | N/A | N/A | 2 | 41.85 | N/A |
| NM_001080975.13.9 | REPS2    | chrX  | 17080560  | 17095530  | N/A | N/A | 2 | 41.85 | N/A |
| NM_003384.11.2    | VRK1     | chr14 | 97299803  | 97327072  | N/A | N/A | 2 | 41.85 | N/A |
| NM_012425.7.4     | RSU1     | chr10 | 16794537  | 16806509  | N/A | N/A | 2 | 41.85 | N/A |
| NM_012425.7.3     | RSU1     | chr10 | 16794537  | 16824083  | N/A | N/A | 2 | 41.85 | N/A |
| NM_033419.3.2     | PGAP3    | chr17 | 37840849  | 37842272  | N/A | N/A | 2 | 41.85 | N/A |
| NM_002874.9.2     | RAD23B   | chr9  | 110062421 | 110087285 | N/A | N/A | 2 | 41.85 | N/A |
| NM_018850.14.13   | ABCB4    | chr7  | 87068982  | 87069718  | N/A | N/A | 2 | 41.85 | N/A |
| NM_032156.8.2     | CAPRIN2  | chr12 | 30881581  | 30904067  | N/A | N/A | 2 | 41.85 | N/A |
| NM_024649.11.9    | BBS1     | chr11 | 66288740  | 66291353  | N/A | N/A | 2 | 41.85 | N/A |
| NM_206866.4.2     | BACH1    | chr21 | 30693541  | 30702014  | N/A | N/A | 2 | 41.85 | N/A |
| NM_152778.12.7    | MFSD8    | chr4  | 128842678 | 128861152 | N/A | N/A | 2 | 41.85 | N/A |

|                    |           |       |           |           |     |     |   |       |     |
|--------------------|-----------|-------|-----------|-----------|-----|-----|---|-------|-----|
| NM_032341.8.5      | DDI2      | chr1  | 15964801  | 15978390  | N/A | N/A | 2 | 41.85 | N/A |
| NM_025151.2.2      | RAB11FIP1 | chr8  | 37734626  | 37735069  | N/A | N/A | 2 | 41.85 | N/A |
| NM_004996.22.21    | ABCC1     | chr16 | 16200594  | 16205439  | N/A | N/A | 2 | 41.85 | N/A |
| NM_017645.9.2      | HAUS6     | chr9  | 19080476  | 19096767  | N/A | N/A | 2 | 41.85 | N/A |
| NM_015239.8.2      | AGTPBP1   | chr9  | 88284399  | 88327481  | N/A | N/A | 2 | 41.85 | N/A |
| NR_103492.20.16    | -         | chr2  | 233675953 | 233684695 | N/A | N/A | 2 | 41.85 | N/A |
| NM_001288756.8.7   | BABAM1    | chr19 | 17387303  | 17387718  | N/A | N/A | 2 | 41.85 | N/A |
| NM_152641.16.7     | ARID2     | chr12 | 46230371  | 46254732  | N/A | N/A | 2 | 41.85 | N/A |
| NM_015578.6.4      | LSM14A    | chr19 | 34699833  | 34706566  | N/A | N/A | 2 | 41.85 | N/A |
| NM_203343.10.9     | EPB41     | chr1  | 29362337  | 29365938  | N/A | N/A | 2 | 41.85 | N/A |
| NM_001145808.5.3   | ITGAM     | chr16 | 31276715  | 31277468  | N/A | N/A | 2 | 41.85 | N/A |
| NM_001257190.3.2   | POM121    | chr7  | 72361165  | 72361649  | N/A | N/A | 2 | 41.85 | N/A |
| NM_017880.4.3      | C2orf42   | chr2  | 70406663  | 70409129  | N/A | N/A | 2 | 41.85 | N/A |
| NM_198468.10.7     | MMS22L    | chr6  | 97702432  | 97717868  | N/A | N/A | 2 | 41.85 | N/A |
| NM_080840.5.3      | PTPRA     | chr20 | 2928627   | 2945848   | N/A | N/A | 2 | 41.85 | N/A |
| NM_018351.2.2      | FGD6      | chr12 | 95602618  | 95605043  | N/A | N/A | 2 | 41.85 | N/A |
| NM_001130020.17.14 | ATP6V0A1  | chr17 | 40647643  | 40653322  | N/A | N/A | 2 | 41.85 | N/A |
| NM_213655.25.23    | WNK1      | chr12 | 1003727   | 1006847   | N/A | N/A | 2 | 41.85 | N/A |
| NM_001193431.11.8  | PTPN22    | chr1  | 114391161 | 114397671 | N/A | N/A | 2 | 41.85 | N/A |
| NM_016166.9.3      | PIAS1     | chr15 | 68434283  | 68466230  | N/A | N/A | 2 | 41.85 | N/A |
| NR_002824.7.3      | -         | chr15 | 23333848  | 23356220  | N/A | N/A | 2 | 41.85 | N/A |
| NM_004481.3.2      | GALNT2    | chr1  | 230313963 | 230339036 | N/A | N/A | 2 | 41.85 | N/A |
| NM_053051.13.13    | CNTROB    | chr17 | 7849045   | 7849304   | N/A | N/A | 2 | 41.85 | N/A |
| NM_004459.9.6      | BPTF      | chr17 | 65882243  | 65890281  | N/A | N/A | 2 | 41.85 | N/A |
| NM_018184.6.5      | ARL8B     | chr3  | 5215701   | 5216099   | N/A | N/A | 2 | 41.85 | N/A |
| NM_001167671.5.4   | LPP       | chr3  | 188202379 | 188242575 | N/A | N/A | 2 | 41.85 | N/A |
| NM_000081.48.46    | LYST      | chr1  | 235850248 | 235860572 | N/A | N/A | 2 | 41.85 | N/A |
| NM_002664.8.5      | PLEK      | chr2  | 68613633  | 68621308  | N/A | N/A | 2 | 41.85 | N/A |
| NM_000455.6.2      | STK11     | chr19 | 1218415   | 1221339   | N/A | N/A | 2 | 41.85 | N/A |
| NM_016955.8.3      | SEPSECS   | chr4  | 25146395  | 25158596  | N/A | N/A | 2 | 41.85 | N/A |
| NM_002025.3.3      | AFF2      | chrX  | 147743428 | 147744289 | N/A | N/A | 2 | 41.85 | N/A |
| NM_175710.11.5     | CR1L      | chr1  | 207867697 | 207891036 | N/A | N/A | 2 | 41.85 | N/A |
| NM_001278604.5.2   | LARP1B    | chr4  | 128995614 | 129003460 | N/A | N/A | 2 | 41.85 | N/A |

|                    |          |                 |           |           |     |     |   |       |     |
|--------------------|----------|-----------------|-----------|-----------|-----|-----|---|-------|-----|
| NM_014155.2.2      | ZBTB44   | chr11           | 130130750 | 130131824 | N/A | N/A | 2 | 41.85 | N/A |
| NM_015285.16.15    | WDR7     | chr18           | 54423813  | 54426184  | N/A | N/A | 2 | 41.85 | N/A |
| NM_002692.10.4     | POLE2    | chr14           | 50130032  | 50141145  | N/A | N/A | 2 | 41.85 | N/A |
| NM_001282129.14.9  | SSH2     | chr17           | 27975161  | 27999147  | N/A | N/A | 2 | 41.85 | N/A |
| NM_005121.16.13    | MED13    | chr17           | 60059558  | 60062451  | N/A | N/A | 2 | 41.85 | N/A |
| NM_001031835.27.16 | PHKB     | chr16           | 47674945  | 47703328  | N/A | N/A | 2 | 41.85 | N/A |
| NM_002750.4.1      | MAPK8    | chr10           | 49609654  | 49618211  | N/A | N/A | 2 | 41.85 | N/A |
| NM_032482.7.4      | DOT1L    | chr19           | 2189730   | 2194576   | N/A | N/A | 2 | 41.85 | N/A |
| NM_001105515.8.5   | ABCC4    | chr13           | 95858785  | 95863035  | N/A | N/A | 2 | 41.85 | N/A |
| NM_001287811.10.9  | DNAJC16  | chr1            | 15890423  | 15890854  | N/A | N/A | 2 | 41.85 | N/A |
| NM_018179.2.2      | ATF7IP   | chr12           | 14576842  | 14578407  | N/A | N/A | 2 | 41.85 | N/A |
| NM_018056.5.4      | TMEM39B  | chr1            | 32542363  | 32542919  | N/A | N/A | 2 | 41.85 | N/A |
| NM_138364.10.4     | PRMT9    | chr4            | 148563937 | 148594277 | N/A | N/A | 2 | 41.85 | N/A |
| NM_001164163.14.10 | PPP6R3   | chr11           | 68334481  | 68343511  | N/A | N/A | 2 | 41.85 | N/A |
| NM_001184801.4.3   | UBR2     | chr6            | 42559888  | 42562042  | N/A | N/A | 2 | 41.85 | N/A |
| NM_018312.10.7     | PPP6R3   | chr11           | 68318588  | 68331900  | N/A | N/A | 2 | 41.85 | N/A |
| NM_031417.4.3      | MARK4    | chr19           | 45766370  | 45766625  | N/A | N/A | 2 | 41.85 | N/A |
| NM_001134649.7.3   | EIF4E3   | chr3            | 71739160  | 71759635  | N/A | N/A | 2 | 41.85 | N/A |
| NM_015155.5.4      | LARP4B   | chr10           | 909682    | 910210    | N/A | N/A | 2 | 41.85 | N/A |
| NM_001134937.15.10 | FIP1L1   | chr4            | 54280781  | 54310270  | N/A | N/A | 2 | 41.85 | N/A |
| NM_014671.17.15    | UBE3C    | chr7            | 157013382 | 157018233 | N/A | N/A | 2 | 41.85 | N/A |
| NM_003972.26.23    | BTAFL1   | chr10           | 93754291  | 93768032  | N/A | N/A | 2 | 41.85 | N/A |
| NM_005225.3.2      | E2F1     | chr20           | 32267560  | 32268222  | N/A | N/A | 2 | 41.85 | N/A |
| NM_014798.4.3      | PLEKHM1  | chr17_ctg5_hap1 | 167528    | 170575    | N/A | N/A | 2 | 41.85 | N/A |
| NM_004514.3.2      | FOXK2    | chr17           | 80521229  | 80526077  | N/A | N/A | 2 | 41.85 | N/A |
| NM_001287821.18.15 | ZWILCH   | chr15           | 66828270  | 66839043  | N/A | N/A | 2 | 41.85 | N/A |
| NM_017905.10.8     | TMCO3    | chr13           | 114174930 | 114193822 | N/A | N/A | 2 | 41.85 | N/A |
| NM_022166.3.3      | XYLT1    | chr16           | 17352844  | 17353355  | N/A | N/A | 2 | 41.85 | N/A |
| NM_018683.5.3      | RNF114   | chr20           | 48561918  | 48565892  | N/A | N/A | 2 | 41.85 | N/A |
| NM_001135147.6.3   | SLC39A8  | chr4            | 103225473 | 103236987 | N/A | N/A | 2 | 41.85 | N/A |
| NM_005121.5.4      | MED13    | chr17           | 60111147  | 60112969  | N/A | N/A | 2 | 41.85 | N/A |
| NM_001135608.19.15 | ARHGAP26 | chr5            | 142434003 | 142513670 | N/A | N/A | 2 | 41.85 | N/A |
| NM_014313.6.2      | TMEM50A  | chr1            | 25666964  | 25683344  | N/A | N/A | 2 | 41.85 | N/A |

|                    |          |       |           |           |     |     |   |       |     |
|--------------------|----------|-------|-----------|-----------|-----|-----|---|-------|-----|
| NR_045796.21.19    | -        | chr20 | 47708582  | 47711500  | N/A | N/A | 2 | 41.85 | N/A |
| NM_003185.14.2     | TAF4     | chr20 | 60572605  | 60589763  | N/A | N/A | 2 | 41.85 | N/A |
| NM_000031.2.2      | ALAD     | chr9  | 116155726 | 116155914 | N/A | N/A | 2 | 41.85 | N/A |
| NM_001170766.7.3   | LCOR     | chr10 | 98667021  | 98711953  | N/A | N/A | 2 | 41.85 | N/A |
| NM_001145811.8.5   | SOX6     | chr11 | 16119154  | 16208501  | N/A | N/A | 2 | 41.85 | N/A |
| NM_004788.10.9     | UBE4A    | chr11 | 118245610 | 118247409 | N/A | N/A | 2 | 41.85 | N/A |
| NM_001109662.55.42 | HECTD4   | chr12 | 112638441 | 112666615 | N/A | N/A | 2 | 41.85 | N/A |
| NM_003384.12.2     | VRK1     | chr14 | 97299803  | 97342457  | N/A | N/A | 2 | 41.85 | N/A |
| NM_021729.9.8      | VPS11    | chr11 | 118947606 | 118948357 | N/A | N/A | 2 | 41.85 | N/A |
| NM_001031711.9.8   | ERGIC1   | chr5  | 172359438 | 172362313 | N/A | N/A | 2 | 41.85 | N/A |
| NM_001042544.25.23 | LTBP4    | chr19 | 41122794  | 41125398  | N/A | N/A | 2 | 41.85 | N/A |
| NM_001242906.3.2   | ASCC2    | chr22 | 30221075  | 30228331  | N/A | N/A | 2 | 41.85 | N/A |
| NM_002267.9.7      | KPNA3    | chr13 | 50296090  | 50299637  | N/A | N/A | 2 | 41.85 | N/A |
| NM_001626.4.2      | AKT2     | chr19 | 40761064  | 40771258  | N/A | N/A | 2 | 41.85 | N/A |
| NM_015950.6.3      | MRPL2    | chr6  | 43023282  | 43024183  | N/A | N/A | 2 | 41.85 | N/A |
| NM_001136191.6.5   | KANK2    | chr19 | 11289020  | 11289396  | N/A | N/A | 2 | 41.85 | N/A |
| NM_018593.3.2      | SLC16A10 | chr6  | 111493897 | 111498868 | N/A | N/A | 2 | 41.85 | N/A |
| NM_007368.22.21    | RASA3    | chr13 | 114757960 | 114762215 | N/A | N/A | 2 | 41.85 | N/A |
| NM_012138.4.3      | AATF     | chr17 | 35310185  | 35311207  | N/A | N/A | 2 | 41.85 | N/A |
| NM_001193268.21.20 | EML2     | chr19 | 46116798  | 46117958  | N/A | N/A | 2 | 41.85 | N/A |
| NM_001067.33.30    | TOP2A    | chr17 | 38547757  | 38548989  | N/A | N/A | 2 | 41.85 | N/A |
| NM_015030.17.11    | FRYL     | chr4  | 48592675  | 48607850  | N/A | N/A | 2 | 41.85 | N/A |
| NM_016525.4.4      | UBAP1    | chr9  | 34241182  | 34242106  | N/A | N/A | 2 | 41.85 | N/A |
| NM_005151.13.6     | USP14    | chr18 | 192841    | 204692    | N/A | N/A | 2 | 41.85 | N/A |
| NM_014826.33.31    | CDC42BPA | chr1  | 227192694 | 227204751 | N/A | N/A | 2 | 41.85 | N/A |
| NM_007345.3.2      | ZNF236   | chr18 | 74561481  | 74563895  | N/A | N/A | 2 | 41.85 | N/A |
| NM_001261392.12.6  | NOL10    | chr2  | 10784445  | 10808849  | N/A | N/A | 2 | 41.85 | N/A |
| NM_001114394.12.5  | PAPD4    | chr5  | 78936673  | 78964851  | N/A | N/A | 2 | 41.85 | N/A |
| NM_001080491.13.10 | USP6NL   | chr10 | 11523768  | 11527910  | N/A | N/A | 2 | 41.85 | N/A |
| NM_014053.3.2      | FLVCR1   | chr1  | 213037066 | 213046160 | N/A | N/A | 2 | 41.85 | N/A |
| NM_020244.4.2      | CHPT1    | chr12 | 102107867 | 102110590 | N/A | N/A | 2 | 41.85 | N/A |
| NM_025126.3.2      | RNF34    | chr12 | 121853961 | 121855714 | N/A | N/A | 2 | 41.85 | N/A |
| NM_001198810.11.9  | SLC43A1  | chr11 | 57258696  | 57259335  | N/A | N/A | 2 | 41.85 | N/A |

|                    |          |       |           |           |     |     |   |       |     |
|--------------------|----------|-------|-----------|-----------|-----|-----|---|-------|-----|
| NM_003126.3.2      | SPTA1    | chr1  | 158653160 | 158655137 | N/A | N/A | 2 | 41.85 | N/A |
| NM_001127890.4.2   | SPG21    | chr15 | 65266939  | 65275931  | N/A | N/A | 2 | 41.85 | N/A |
| NM_014845.10.2     | FIG4     | chr6  | 110036280 | 110064975 | N/A | N/A | 2 | 41.85 | N/A |
| NM_003126.51.45    | SPTA1    | chr1  | 158582606 | 158589124 | N/A | N/A | 2 | 41.85 | N/A |
| NM_001876.8.6      | CPT1A    | chr11 | 68562271  | 68566823  | N/A | N/A | 2 | 41.85 | N/A |
| NM_017926.9.3      | GPATCH2L | chr14 | 76633005  | 76662315  | N/A | N/A | 2 | 41.85 | N/A |
| NM_001048183.8.7   | PHACTR4  | chr1  | 28800065  | 28802803  | N/A | N/A | 2 | 41.85 | N/A |
| NM_032582.9.6      | USP32    | chr17 | 58342772  | 58348842  | N/A | N/A | 2 | 41.85 | N/A |
| NM_001252049.6.2   | PCMT1    | chr6  | 150092297 | 150117636 | N/A | N/A | 2 | 41.85 | N/A |
| NM_015473.11.8     | HEATR5A  | chr14 | 31849672  | 31856581  | N/A | N/A | 2 | 41.85 | N/A |
| NM_021174.7.6      | CCAR2    | chr8  | 22464708  | 22465578  | N/A | N/A | 2 | 41.85 | N/A |
| NM_001162384.11.8  | ARHGEF2  | chr1  | 155931451 | 155932974 | N/A | N/A | 2 | 41.85 | N/A |
| NM_012406.11.6     | PRDM4    | chr12 | 108133159 | 108140201 | N/A | N/A | 2 | 41.85 | N/A |
| NM_001079559.4.2   | HNRNPUL2 | chr11 | 62491058  | 62491898  | N/A | N/A | 2 | 41.85 | N/A |
| NM_001286635.4.2   | C6orf89  | chr6  | 36862279  | 36870210  | N/A | N/A | 2 | 41.85 | N/A |
| NM_024755.19.18    | SLTM     | chr15 | 59179173  | 59179739  | N/A | N/A | 2 | 41.85 | N/A |
| NM_001282680.15.11 | GAPVD1   | chr9  | 128086076 | 128094908 | N/A | N/A | 2 | 41.85 | N/A |
| NR_024054.3.2      | -        | chr5  | 69515744  | 69517842  | N/A | N/A | 2 | 41.85 | N/A |
| NM_015197.4.2      | PACS2    | chr14 | 105814829 | 105821514 | N/A | N/A | 2 | 41.85 | N/A |
| NM_015017.18.12    | USP33    | chr1  | 78183551  | 78191447  | N/A | N/A | 2 | 41.85 | N/A |
| NM_145062.9.4      | ZUFSP    | chr6  | 116966876 | 116980087 | N/A | N/A | 2 | 41.85 | N/A |
| NR_036680.9.3      | -        | chr7  | 32672154  | 32718742  | N/A | N/A | 2 | 41.85 | N/A |
| NM_174905.6.4      | FAM98C   | chr19 | 38895547  | 38896275  | N/A | N/A | 2 | 41.85 | N/A |
| NM_139067.25.23    | SMARCC2  | chr12 | 56563312  | 56563992  | N/A | N/A | 2 | 41.85 | N/A |
| NM_014868.10.8     | RNF10    | chr12 | 121000747 | 121001746 | N/A | N/A | 2 | 41.85 | N/A |
| NM_001080824.2.2   | TRABD2A  | chr2  | 85097348  | 85097909  | N/A | N/A | 2 | 41.85 | N/A |
| NM_000333.5.2      | ATXN7    | chr3  | 63884074  | 63938159  | N/A | N/A | 2 | 41.85 | N/A |
| NM_032025.10.10    | EIF2A    | chr3  | 150289744 | 150290316 | N/A | N/A | 2 | 41.85 | N/A |
| NM_153211.6.2      | TTC39C   | chr18 | 21644103  | 21663045  | N/A | N/A | 2 | 41.85 | N/A |
| NM_006540.10.9     | NCOA2    | chr8  | 71071739  | 71075089  | N/A | N/A | 2 | 41.85 | N/A |
| NM_153211.6.5      | TTC39C   | chr18 | 21660548  | 21663045  | N/A | N/A | 2 | 41.85 | N/A |
| NR_028473.4.4      | -        | chr11 | 61133516  | 61133688  | N/A | N/A | 2 | 41.85 | N/A |
| NM_024773.4.3      | KDM8     | chr16 | 27224905  | 27226329  | N/A | N/A | 2 | 41.85 | N/A |

|                    |          |       |           |           |     |     |   |       |     |
|--------------------|----------|-------|-----------|-----------|-----|-----|---|-------|-----|
| NM_152699.2.2      | SENP5    | chr3  | 196612021 | 196613565 | N/A | N/A | 2 | 41.85 | N/A |
| NM_001256469.3.3   | KAT6B    | chr10 | 76602357  | 76603236  | N/A | N/A | 2 | 41.85 | N/A |
| NR_037774.10.8     | -        | chr10 | 17746429  | 17747740  | N/A | N/A | 2 | 41.85 | N/A |
| NM_001270764.6.2   | CHST15   | chr10 | 125780771 | 125806240 | N/A | N/A | 2 | 41.85 | N/A |
| NM_002569.8.2      | FURIN    | chr15 | 91418811  | 91421534  | N/A | N/A | 2 | 41.85 | N/A |
| NM_152896.8.6      | UHRF2    | chr9  | 6477621   | 6482099   | N/A | N/A | 2 | 41.85 | N/A |
| NM_001193431.14.8  | PTPN22   | chr1  | 114377531 | 114397671 | N/A | N/A | 2 | 41.85 | N/A |
| NM_001145819.8.7   | SOX6     | chr11 | 16119154  | 16133469  | N/A | N/A | 2 | 41.85 | N/A |
| NM_001206947.12.2  | PICALM   | chr11 | 85707868  | 85742653  | N/A | N/A | 2 | 41.85 | N/A |
| NM_198859.7.3      | PRICKLE2 | chr3  | 64132505  | 64148805  | N/A | N/A | 2 | 41.85 | N/A |
| NM_145061.7.3      | SKA3     | chr13 | 21732060  | 21746643  | N/A | N/A | 2 | 41.85 | N/A |
| NM_015601.15.9     | HERC4    | chr10 | 69748419  | 69773943  | N/A | N/A | 2 | 41.85 | N/A |
| NM_152468.9.6      | TMC8     | chr17 | 76129486  | 76131090  | N/A | N/A | 2 | 41.85 | N/A |
| NM_058246.8.6      | DNAJB6   | chr7  | 157174939 | 157178305 | N/A | N/A | 2 | 41.85 | N/A |
| NM_003268.5.4      | TLR5     | chr1  | 223305816 | 223308206 | N/A | N/A | 2 | 41.85 | N/A |
| NM_016940.4.2      | RWDD2B   | chr21 | 30380081  | 30380942  | N/A | N/A | 2 | 41.85 | N/A |
| NM_001281749.15.12 | SIK3     | chr11 | 116734383 | 116744352 | N/A | N/A | 2 | 41.85 | N/A |
| NM_001812.7.6      | CENPC    | chr4  | 68383873  | 68385220  | N/A | N/A | 2 | 41.85 | N/A |
| NM_001128848.32.29 | SMARCA4  | chr19 | 11168933  | 11170863  | N/A | N/A | 2 | 41.85 | N/A |
| NM_023034.17.15    | WHSC1L1  | chr8  | 38147992  | 38157108  | N/A | N/A | 2 | 41.85 | N/A |
| NM_014708.36.34    | KNTC1    | chr12 | 123067251 | 123069537 | N/A | N/A | 2 | 41.85 | N/A |
| NM_014801.19.13    | PCNX2    | chr1  | 233296028 | 233344435 | N/A | N/A | 2 | 41.85 | N/A |
| NM_153188.6.5      | TNPO1    | chr5  | 72157634  | 72161556  | N/A | N/A | 2 | 41.85 | N/A |
| NM_017673.16.14    | SWT1     | chr1  | 185183638 | 185200840 | N/A | N/A | 2 | 41.85 | N/A |
| NM_004843.6.5      | IL27RA   | chr19 | 14153264  | 14153601  | N/A | N/A | 2 | 41.85 | N/A |
| NM_152244.5.3      | SNX11    | chr17 | 46189392  | 46190763  | N/A | N/A | 2 | 41.85 | N/A |
| NM_015866.5.3      | PRDM2    | chr1  | 14057494  | 14068652  | N/A | N/A | 2 | 41.85 | N/A |
| NM_012411.16.13    | PTPN22   | chr1  | 114372213 | 114377061 | N/A | N/A | 2 | 41.85 | N/A |
| NM_001286717.16.13 | AGTPBP1  | chr9  | 88233897  | 88248289  | N/A | N/A | 2 | 41.85 | N/A |
| NM_013373.10.2     | ZDHHC8   | chr22 | 20126716  | 20131279  | N/A | N/A | 2 | 41.85 | N/A |
| NM_000637.6.5      | GSR      | chr8  | 30557597  | 30560757  | N/A | N/A | 2 | 41.85 | N/A |
| NM_144649.6.3      | TMEM71   | chr8  | 133740043 | 133769540 | N/A | N/A | 2 | 41.85 | N/A |
| NM_030767.11.7     | AKNA     | chr9  | 117121873 | 117126899 | N/A | N/A | 2 | 41.85 | N/A |

|                    |         |       |           |           |     |     |   |        |     |
|--------------------|---------|-------|-----------|-----------|-----|-----|---|--------|-----|
| NM_014063.4.2      | DBNL    | chr7  | 44089823  | 44092540  | N/A | N/A | 2 | 41.85  | N/A |
| NR_110254.11.5     | -       | chr4  | 83857133  | 83867627  | N/A | N/A | 2 | 41.85  | N/A |
| NM_001271052.14.13 | ADGRE2  | chr19 | 14862247  | 14863338  | N/A | N/A | 2 | 41.85  | N/A |
| NM_001201407.5.4   | ZNF778  | chr16 | 89289564  | 89291210  | N/A | N/A | 2 | 41.85  | N/A |
| NM_020784.9.2      | TXNDC16 | chr14 | 52977957  | 53011089  | N/A | N/A | 2 | 41.85  | N/A |
| NM_003400.22.17    | XPO1    | chr2  | 61710091  | 61717911  | N/A | N/A | 2 | 41.85  | N/A |
| NR_024386.4.3      | -       | chr17 | 62817884  | 62818511  | N/A | N/A | 2 | 41.85  | N/A |
| NM_001316.8.7      | CSE1L   | chr20 | 47685251  | 47686834  | N/A | N/A | 2 | 41.85  | N/A |
| NM_001128840.3.2   | CACNA1D | chr3  | 53531178  | 53535747  | N/A | N/A | 2 | 41.85  | N/A |
| NM_153645.6.6      | NUP50   | chr22 | 45574118  | 45574781  | N/A | N/A | 2 | 41.85  | N/A |
| NM_013411.6.5      | AK2     | chr1  | 33478807  | 33480195  | N/A | N/A | 2 | 41.85  | N/A |
| NM_001271010.6.2   | FLI1    | chr11 | 128628009 | 128651918 | N/A | N/A | 2 | 41.85  | N/A |
| NR_037619.4.2      | -       | chr16 | 66642211  | 66643906  | N/A | N/A | 2 | 41.85  | N/A |
| NM_005121.15.13    | MED13   | chr17 | 60061531  | 60062451  | N/A | N/A | 2 | 41.85  | N/A |
| NM_206943.9.5      | LTBP1   | chr2  | 33359859  | 33447218  | N/A | N/A | 2 | 41.85  | N/A |
| NM_014708.12.9     | KNTC1   | chr12 | 123030722 | 123032516 | N/A | N/A | 2 | 41.85  | N/A |
| NM_014109.21.20    | ATAD2   | chr8  | 124349864 | 124351686 | N/A | N/A | 2 | 41.85  | N/A |
| NM_001098823.2.2   | TMEM91  | chr19 | 41884185  | 41884424  | N/A | N/A | 2 | 41.85  | N/A |
| NM_152879.3.2      | DGKD    | chr2  | 234296902 | 234299129 | N/A | N/A | 3 | 62.775 | N/A |
| NM_015226.21.11    | CLEC16A | chr16 | 11114049  | 11220003  | N/A | N/A | 3 | 62.775 | N/A |
| NM_007124.32.28    | UTRN    | chr6  | 144808683 | 144814592 | N/A | N/A | 3 | 62.775 | N/A |
| NM_001013836.3.2   | MAD1L1  | chr7  | 2269618   | 2270362   | N/A | N/A | 3 | 62.775 | N/A |
| NM_003932.5.3      | ST13    | chr22 | 41236629  | 41244373  | N/A | N/A | 3 | 62.775 | N/A |
| NM_003550.3.2      | MAD1L1  | chr7  | 2269618   | 2270399   | N/A | N/A | 3 | 62.775 | N/A |
| NR_003655.3.2      | -       | chr7  | 44054204  | 44056122  | N/A | N/A | 3 | 62.775 | N/A |
| NM_005493.12.6     | RANBP9  | chr6  | 13632601  | 13644961  | N/A | N/A | 3 | 62.775 | N/A |
| NM_198531.8.2      | ATP9B   | chr18 | 76856475  | 76936907  | N/A | N/A | 3 | 62.775 | N/A |
| NM_139241.10.5     | FGD4    | chr12 | 32751430  | 32764217  | N/A | N/A | 3 | 62.775 | N/A |
| NM_001199381.3.2   | RNF145  | chr5  | 158621723 | 158630664 | N/A | N/A | 3 | 62.775 | N/A |
| NM_001121.9.4      | ADD3    | chr10 | 111876016 | 111882050 | N/A | N/A | 3 | 62.775 | N/A |
| NM_002372.8.5      | MAN2A1  | chr5  | 109091029 | 109110666 | N/A | N/A | 3 | 62.775 | N/A |
| NM_001247996.14.4  | ASAP1   | chr8  | 131164981 | 131370389 | N/A | N/A | 3 | 62.775 | N/A |
| NM_003120.4.3      | SPI1    | chr11 | 47380394  | 47381591  | N/A | N/A | 3 | 62.775 | N/A |

|                   |            |                 |           |           |     |     |   |        |     |
|-------------------|------------|-----------------|-----------|-----------|-----|-----|---|--------|-----|
| NM_002372.4.2     | MAN2A1     | chr5            | 109049220 | 109065214 | N/A | N/A | 3 | 62.775 | N/A |
| NM_002887.5.2     | RARS       | chr5            | 167915606 | 167921655 | N/A | N/A | 3 | 62.775 | N/A |
| NM_020119.3.2     | ZC3HAV1    | chr7            | 138768525 | 138774505 | N/A | N/A | 3 | 62.775 | N/A |
| NM_002558.7.2     | P2RX1      | chr17           | 3806495   | 3808661   | N/A | N/A | 3 | 62.775 | N/A |
| NM_020716.5.4     | GRAMD1B    | chr11           | 123464789 | 123465546 | N/A | N/A | 3 | 62.775 | N/A |
| NM_153369.3.2     | MFSD4B     | chr6            | 111583459 | 111585149 | N/A | N/A | 3 | 62.775 | N/A |
| NM_001270940.9.8  | XPO6       | chr16           | 28163979  | 28167848  | N/A | N/A | 3 | 62.775 | N/A |
| NM_006788.6.5     | RALBP1     | chr18           | 9524591   | 9525849   | N/A | N/A | 3 | 62.775 | N/A |
| NM_017988.4.2     | SCYL2      | chr12           | 100676720 | 100691953 | N/A | N/A | 3 | 62.775 | N/A |
| NM_003370.7.4     | VASP       | chr19           | 46024579  | 46026076  | N/A | N/A | 3 | 62.775 | N/A |
| NM_001033555.10.6 | SPECC1     | chr17           | 20149238  | 20163607  | N/A | N/A | 3 | 62.775 | N/A |
| NM_152493.8.7     | ZNF362     | chr1            | 33760537  | 33760906  | N/A | N/A | 3 | 62.775 | N/A |
| NM_018489.5.4     | ASH1L      | chr1            | 155408117 | 155429689 | N/A | N/A | 3 | 62.775 | N/A |
| NM_018590.3.2     | CSGALNACT2 | chr10           | 43650344  | 43654379  | N/A | N/A | 3 | 62.775 | N/A |
| NM_014643.3.3     | ZNF516     | chr18           | 74153200  | 74155167  | N/A | N/A | 3 | 62.775 | N/A |
| NM_005720.5.4     | ARPC1B     | chr7            | 98985661  | 98987635  | N/A | N/A | 3 | 62.775 | N/A |
| NM_015642.9.9     | ZBTB20     | chr3            | 114069120 | 114070725 | N/A | N/A | 3 | 62.775 | N/A |
| NM_001244713.4.2  | RAD23B     | chr9            | 110062421 | 110068928 | N/A | N/A | 3 | 62.775 | N/A |
| NM_015443.2.2     | KANSL1     | chr17_ctg5_hap1 | 616744    | 618122    | N/A | N/A | 3 | 62.775 | N/A |
| NM_017772.11.5    | TBC1D22B   | chr6            | 37250657  | 37284606  | N/A | N/A | 3 | 62.775 | N/A |
| NM_018442.4.2     | DCAF6      | chr1            | 167921037 | 167944253 | N/A | N/A | 3 | 62.775 | N/A |
| NM_003922.24.22   | HERC1      | chr15           | 64004973  | 64008672  | N/A | N/A | 3 | 62.775 | N/A |
| NM_001276471.8.7  | CORO1C     | chr12           | 109046047 | 109048186 | N/A | N/A | 3 | 62.775 | N/A |
| NR_027028.4.4     | -          | chr5            | 21491429  | 21491617  | N/A | N/A | 3 | 62.775 | N/A |
| NM_017742.5.2     | ZCCHC2     | chr18           | 60206913  | 60217693  | N/A | N/A | 3 | 62.775 | N/A |
| NM_032012.14.13   | TMEM245    | chr9            | 111812562 | 111812972 | N/A | N/A | 3 | 62.775 | N/A |
| NM_014494.5.3     | TNRC6A     | chr16           | 24762046  | 24788679  | N/A | N/A | 3 | 62.775 | N/A |
| NM_015020.13.7    | PHLPP2     | chr16           | 71697801  | 71713438  | N/A | N/A | 3 | 62.775 | N/A |
| NM_006699.4.2     | MAN1A2     | chr1            | 117944807 | 117957453 | N/A | N/A | 3 | 62.775 | N/A |
| NM_001284238.4.3  | GTDC1      | chr2            | 144966169 | 144969146 | N/A | N/A | 3 | 62.775 | N/A |
| NM_171982.3.3     | TRIM35     | chr8            | 27151596  | 27151827  | N/A | N/A | 3 | 62.775 | N/A |
| NM_001260.12.10   | CDK8       | chr13           | 26974589  | 26975761  | N/A | N/A | 3 | 62.775 | N/A |
| NM_173165.2.2     | NFATC3     | chr16           | 68155889  | 68157024  | N/A | N/A | 3 | 62.775 | N/A |



|                    |          |       |           |           |     |     |   |        |     |
|--------------------|----------|-------|-----------|-----------|-----|-----|---|--------|-----|
| NM_001286188.7.3   | SCAF8    | chr6  | 155095122 | 155116273 | N/A | N/A | 3 | 62.775 | N/A |
| NM_002582.5.4      | PARN     | chr16 | 14720962  | 14721193  | N/A | N/A | 3 | 62.775 | N/A |
| NM_003410.5.4      | ZFX      | chrX  | 24190831  | 24197887  | N/A | N/A | 3 | 62.775 | N/A |
| NM_007368.4.2      | RASA3    | chr13 | 114806475 | 114839312 | N/A | N/A | 3 | 62.775 | N/A |
| NM_021117.11.5     | CRY2     | chr11 | 45883610  | 45893784  | N/A | N/A | 3 | 62.775 | N/A |
| NM_032440.7.5      | LCOR     | chr10 | 98703869  | 98711953  | N/A | N/A | 3 | 62.775 | N/A |
| NM_001077351.5.2   | RBM23    | chr14 | 23375403  | 23380612  | N/A | N/A | 3 | 62.775 | N/A |
| NM_020823.6.3      | TMEM181  | chr6  | 159001971 | 159010814 | N/A | N/A | 3 | 62.775 | N/A |
| NM_006327.6.2      | TIMM23   | chr10 | 51606987  | 51620382  | N/A | N/A | 3 | 62.775 | N/A |
| NM_017844.4.3      | ANKMY1   | chr2  | 241492330 | 241494472 | N/A | N/A | 3 | 62.775 | N/A |
| NM_178566.8.4      | ZDHHC21  | chr9  | 14639893  | 14674383  | N/A | N/A | 3 | 62.775 | N/A |
| NM_001206703.7.2   | SP100    | chr2  | 231307651 | 231314970 | N/A | N/A | 3 | 62.775 | N/A |
| NM_001142289.10.9  | MGRN1    | chr16 | 4721391   | 4723658   | N/A | N/A | 3 | 62.775 | N/A |
| NM_013438.4.2      | UBQLN1   | chr9  | 86294689  | 86301070  | N/A | N/A | 3 | 62.775 | N/A |
| NM_018091.14.11    | ELP3     | chr8  | 28013458  | 28019595  | N/A | N/A | 3 | 62.775 | N/A |
| NM_182480.4.2      | COQ6     | chr14 | 74420137  | 74422631  | N/A | N/A | 3 | 62.775 | N/A |
| NM_001243439.4.4   | SPECC1   | chr17 | 20107645  | 20109225  | N/A | N/A | 3 | 62.775 | N/A |
| NM_001286612.7.5   | REPS1    | chr6  | 139264649 | 139265759 | N/A | N/A | 3 | 62.775 | N/A |
| NM_001282750.5.2   | SUCO     | chr1  | 172520651 | 172526934 | N/A | N/A | 3 | 62.775 | N/A |
| NM_001163735.12.8  | MYO19    | chr17 | 34869271  | 34871833  | N/A | N/A | 3 | 62.775 | N/A |
| NR_073135.13.12    | -        | chr22 | 26853824  | 26854543  | N/A | N/A | 3 | 62.775 | N/A |
| NM_005177.17.15    | ATP6V0A1 | chr17 | 40650941  | 40653322  | N/A | N/A | 3 | 62.775 | N/A |
| NM_005437.8.8      | NCOA4    | chr10 | 51584615  | 51585599  | N/A | N/A | 3 | 62.775 | N/A |
| NM_001080547.4.2   | SPI1     | chr11 | 47380394  | 47397283  | N/A | N/A | 3 | 62.775 | N/A |
| NM_007318.5.2      | PSEN1    | chr14 | 73614502  | 73640415  | N/A | N/A | 3 | 62.775 | N/A |
| NM_001286724.5.2   | FAM120A  | chr9  | 96233422  | 96261168  | N/A | N/A | 3 | 62.775 | N/A |
| NM_012215.8.5      | MGEA5    | chr10 | 103559998 | 103567658 | N/A | N/A | 3 | 62.775 | N/A |
| NM_001287815.14.13 | UBAP2L   | chr1  | 154223516 | 154224129 | N/A | N/A | 3 | 62.775 | N/A |
| NM_003591.18.13    | CUL2     | chr10 | 35305119  | 35320547  | N/A | N/A | 3 | 62.775 | N/A |
| NM_020475.29.29    | ANK1     | chr8  | 41551415  | 41551620  | N/A | N/A | 3 | 62.775 | N/A |
| NM_001130047.7.2   | TBCEL    | chr11 | 120916382 | 120930794 | N/A | N/A | 3 | 62.775 | N/A |
| NM_181050.5.3      | AXIN1    | chr16 | 354303    | 364683    | N/A | N/A | 3 | 62.775 | N/A |
| NM_198889.29.28    | ANKRD17  | chr4  | 73950965  | 73958017  | N/A | N/A | 3 | 62.775 | N/A |

|                    |          |       |           |           |     |     |   |        |     |
|--------------------|----------|-------|-----------|-----------|-----|-----|---|--------|-----|
| NM_018482.20.17    | ASAP1    | chr8  | 131130406 | 131138335 | N/A | N/A | 3 | 62.775 | N/A |
| NM_006909.17.16    | RASGRF2  | chr5  | 80419460  | 80422982  | N/A | N/A | 3 | 62.775 | N/A |
| NM_018638.6.3      | ETNK1    | chr12 | 22811947  | 22826594  | N/A | N/A | 4 | 83.7   | N/A |
| NM_004544.9.7      | NDUFA10  | chr2  | 240929490 | 240946787 | N/A | N/A | 4 | 83.7   | N/A |
| NM_015308.4.3      | FNBP4    | chr11 | 47774467  | 47776216  | N/A | N/A | 4 | 83.7   | N/A |
| NR_038272.7.3      | -        | chr2  | 179400458 | 179407088 | N/A | N/A | 4 | 83.7   | N/A |
| NM_000052.13.10    | ATP7A    | chrX  | 77268375  | 77275895  | N/A | N/A | 4 | 83.7   | N/A |
| NM_015093.5.5      | TAB2     | chr6  | 149699153 | 149700654 | N/A | N/A | 4 | 83.7   | N/A |
| NM_001164273.9.6   | MGA      | chr15 | 41999925  | 42005694  | N/A | N/A | 4 | 83.7   | N/A |
| NM_053043.5.2      | RBM33    | chr7  | 155457868 | 155473602 | N/A | N/A | 4 | 83.7   | N/A |
| NM_001130913.3.2   | ZNF720   | chr16 | 31733946  | 31734674  | N/A | N/A | 4 | 83.7   | N/A |
| NM_078483.10.2     | SLC36A1  | chr5  | 150838348 | 150859050 | N/A | N/A | 4 | 83.7   | N/A |
| NM_001243403.18.11 | CLEC16A  | chr16 | 11114049  | 11154879  | N/A | N/A | 4 | 83.7   | N/A |
| NM_033111.6.3      | N4BP2L2  | chr13 | 33091993  | 33101669  | N/A | N/A | 4 | 83.7   | N/A |
| NM_001112801.1.1   | SLC8A1   | chr2  | 40655612  | 40657444  | N/A | N/A | 4 | 83.7   | N/A |
| NM_006699.5.2      | MAN1A2   | chr1  | 117944807 | 117963271 | N/A | N/A | 4 | 83.7   | N/A |
| NM_032433.7.6      | ZNF333   | chr19 | 14815865  | 14817585  | N/A | N/A | 4 | 83.7   | N/A |
| NR_003187.7.6      | -        | chr7  | 74578130  | 74578824  | N/A | N/A | 4 | 83.7   | N/A |
| NM_001142464.4.3   | ECSIT    | chr19 | 11623870  | 11625036  | N/A | N/A | 4 | 83.7   | N/A |
| NM_012421.5.2      | RLF      | chr1  | 40654726  | 40668286  | N/A | N/A | 4 | 83.7   | N/A |
| NM_018062.7.2      | FANCL    | chr2  | 58425728  | 58459247  | N/A | N/A | 4 | 83.7   | N/A |
| NM_138782.21.20    | FCHO2    | chr5  | 72370568  | 72373320  | N/A | N/A | 4 | 83.7   | N/A |
| NM_005493.9.6      | RANBP9   | chr6  | 13639794  | 13644961  | N/A | N/A | 4 | 83.7   | N/A |
| NM_015071.17.13    | ARHGAP26 | chr5  | 142416760 | 142437312 | N/A | N/A | 4 | 83.7   | N/A |
| NM_001166006.2.2   | EPB41    | chr1  | 29313942  | 29314417  | N/A | N/A | 4 | 83.7   | N/A |
| NM_207292.4.3      | MBNL1    | chr3  | 152132729 | 152150709 | N/A | N/A | 4 | 83.7   | N/A |
| NM_015106.8.5      | RAD54L2  | chr3  | 51664287  | 51668051  | N/A | N/A | 4 | 83.7   | N/A |
| NM_001080541.2.2   | MGA      | chr15 | 41961025  | 41962156  | N/A | N/A | 4 | 83.7   | N/A |
| NM_001282858.21.21 | GON4L    | chr1  | 155734790 | 155736500 | N/A | N/A | 4 | 83.7   | N/A |
| NM_000876.18.15    | IGF2R    | chr6  | 160467529 | 160469575 | N/A | N/A | 4 | 83.7   | N/A |
| NM_182838.5.2      | SLC35E2  | chr1  | 1666128   | 1671143   | N/A | N/A | 4 | 83.7   | N/A |
| NM_001282529.8.6   | UBAP2    | chr9  | 33953282  | 33963789  | N/A | N/A | 5 | 104.62 | N/A |
| NM_005128.21.20    | DOPEY2   | chr21 | 37619814  | 37620866  | N/A | N/A | 5 | 104.62 | N/A |

|                    |          |       |           |           |     |     |   |        |     |
|--------------------|----------|-------|-----------|-----------|-----|-----|---|--------|-----|
| NM_001042572.5.3   | CHD2     | chr15 | 93467550  | 93472321  | N/A | N/A | 5 | 104.62 | N/A |
| NM_005990.18.14    | STK10    | chr5  | 171479932 | 171488272 | N/A | N/A | 5 | 104.62 | N/A |
| NM_001135022.10.7  | ELMOD3   | chr2  | 85595808  | 85598685  | N/A | N/A | 5 | 104.62 | N/A |
| NM_001243248.8.7   | NPRL3    | chr16 | 148142    | 150507    | N/A | N/A | 5 | 104.62 | N/A |
| NM_144649.7.3      | TMEM71   | chr8  | 133734285 | 133769540 | N/A | N/A | 5 | 104.62 | N/A |
| NM_021231.2.2      | CACTIN   | chr19 | 3623685   | 3624160   | N/A | N/A | 5 | 104.62 | N/A |
| NM_012398.5.4      | PIP5K1C  | chr19 | 3660963   | 3661999   | N/A | N/A | 5 | 104.62 | N/A |
| NM_018454.10.5     | NUSAP1   | chr15 | 41648236  | 41669502  | N/A | N/A | 5 | 104.62 | N/A |
| NM_001146055.4.2   | SNCA     | chr4  | 90743396  | 90756843  | N/A | N/A | 5 | 104.62 | N/A |
| NM_017626.5.4      | DNAJB12  | chr10 | 74100546  | 74100928  | N/A | N/A | 5 | 104.62 | N/A |
| NM_001001548.14.6  | CD36     | chr7  | 80292305  | 80303463  | N/A | N/A | 5 | 104.62 | N/A |
| NM_021937.4.3      | EEFSEC   | chr3  | 127980970 | 127983624 | N/A | N/A | 6 | 125.55 | N/A |
| NM_001114403.3.2   | UPK3BL   | chr7  | 102280650 | 102281220 | N/A | N/A | 6 | 125.55 | N/A |
| NM_018248.9.8      | NEIL3    | chr4  | 178274461 | 178281831 | N/A | N/A | 6 | 125.55 | N/A |
| NM_001289003.8.6   | PHLPP2   | chr16 | 71712657  | 71715808  | N/A | N/A | 6 | 125.55 | N/A |
| NM_001278162.2.2   | HIPK3    | chr11 | 33307958  | 33309057  | N/A | N/A | 6 | 125.55 | N/A |
| NM_001172221.9.8   | SCMH1    | chr1  | 41536266  | 41541123  | N/A | N/A | 6 | 125.55 | N/A |
| NM_032341.6.5      | DDI2     | chr1  | 15964801  | 15970145  | N/A | N/A | 6 | 125.55 | N/A |
| NM_001100400.9.5   | PDS5A    | chr4  | 39915230  | 39927553  | N/A | N/A | 6 | 125.55 | N/A |
| NM_015358.14.13    | MORC3    | chr21 | 37734480  | 37736557  | N/A | N/A | 7 | 146.47 | N/A |
| NM_001177387.3.2   | ATXN7    | chr3  | 63898263  | 63898901  | N/A | N/A | 7 | 146.47 | N/A |
| NM_018248.8.8      | NEIL3    | chr4  | 178274461 | 178274882 | N/A | N/A | 7 | 146.47 | N/A |
| NM_005177.17.16    | ATP6V0A1 | chr17 | 40652724  | 40653322  | N/A | N/A | 7 | 146.47 | N/A |
| NM_017508.12.8     | SOX6     | chr11 | 16036487  | 16119234  | N/A | N/A | 7 | 146.47 | N/A |
| NM_003922.27.22    | HERC1    | chr15 | 63988322  | 64008672  | N/A | N/A | 7 | 146.47 | N/A |
| NM_173163.3.2      | NFATC3   | chr16 | 68155889  | 68160513  | N/A | N/A | 7 | 146.47 | N/A |
| NM_032233.6.2      | SETD3    | chr14 | 99924615  | 99932150  | N/A | N/A | 8 | 167.4  | N/A |
| NM_020728.13.9     | ESYT2    | chr7  | 158552176 | 158557544 | N/A | N/A | 8 | 167.4  | N/A |
| NM_001286375.12.10 | ITGAX    | chr16 | 31373156  | 31374074  | N/A | N/A | 8 | 167.4  | N/A |
| NM_001242925.3.3   | TMCC2    | chr1  | 205238077 | 205239012 | N/A | N/A | 8 | 167.4  | N/A |
| NM_001114380.13.12 | ITGAL    | chr16 | 30507417  | 30507887  | N/A | N/A | 9 | 188.32 | N/A |
| NM_138782.21.17    | FCHO2    | chr5  | 72354259  | 72373320  | N/A | N/A | 9 | 188.32 | N/A |
| NM_001282681.14.13 | GAPVD1   | chr9  | 128099296 | 128099870 | N/A | N/A | 9 | 188.32 | N/A |

|                      |              |                 |                 |                 |            |            |           |               |            |
|----------------------|--------------|-----------------|-----------------|-----------------|------------|------------|-----------|---------------|------------|
| NM_014787.4.2        | DNAJC6       | chr1            | 65830317        | 65831879        | N/A        | N/A        | 10        | 209.25        | N/A        |
| NM_004448.12.5       | ERBB2        | chr17           | 37866065        | 37872192        | N/A        | N/A        | 10        | 209.25        | N/A        |
| NM_001206947.12.9    | PICALM       | chr11           | 85707868        | 85714494        | N/A        | N/A        | 10        | 209.25        | N/A        |
| NM_001167608.8.4     | RHBDD1       | chr2            | 227729319       | 227779067       | N/A        | N/A        | 12        | 251.1         | N/A        |
| <b>NM_015024.9.6</b> | <b>XPO7</b>  | <b>chr8</b>     | <b>21832180</b> | <b>21837714</b> | <b>N/A</b> | <b>N/A</b> | <b>13</b> | <b>272.02</b> | <b>N/A</b> |
| NM_001199691.6.2     | TMEM56-RWDD3 | chr1            | 95609446        | 95639445        | N/A        | N/A        | 13        | 272.02        | N/A        |
| NR_027774.3.3        | -            | chr17_ctg5_hap1 | 167528          | 168155          | N/A        | N/A        | 14        | 292.95        | N/A        |
| NM_001166693.4.3     | AFF1         | chr4            | 87967317        | 87968746        | N/A        | N/A        | 15        | 313.87        | N/A        |
| NM_001143971.2.2     | CDYL         | chr6            | 4891946         | 4892613         | N/A        | N/A        | 15        | 313.87        | N/A        |
| NM_022763.6.5        | FNDC3B       | chr3            | 171965322       | 171969331       | N/A        | N/A        | 16        | 334.8         | N/A        |
| NM_201559.3.3        | FOXO3        | chr6            | 108984657       | 108986092       | N/A        | N/A        | 17        | 355.72        | N/A        |
